# Supplementary material for: Profiling the m 6 A regulated RNA expression patterns and alternative splicing features in esophageal carcinoma
Source: Research Square preprint supplement (doi:10.21203/rs.3.rs-1556752/v1), 2022-04-22
Supplement: Supplementary file 1 [file 34e26875a41b1cdf758ed12a.xlsx]

## Sheet: Table. S1
Table. S1: Basic information of datasets included in this study for identifying distinct m6A methylation modification patterns
Accession number /Source	Platform	Number of patients	Survival data
TCGA: ESCA	Illumina RNAseq	161	OS

## Sheet: Table. S2
Table. S2: Spearman correlation analysis of the 22 m6A modification regulators
Tag	METTL3	METTL14	METTL16	WTAP	ZC3H13	RBM15	RBM15B	YTHDC1	YTHDC2	YTHDF1	YTHDF2	YTHDF3	HNRNPC	FMR1	LRPPRC	HNRNPA2B1	IGF2BP1	RBMX	FTO	ALKBH5	IGF2BP2	IGF2BP3
METTL3	1	0.276009	0.259508	0.0300877	0.287419	0.185872	-0.000623963	0.237051	-0.0377714	0.183583	0.168783	0.285269	0.42689	0.327967	0.160153	0.337674	0.11414	0.381344	0.214887	0.205009	-0.0689866	0.0741613
METTL14	0.276009	1	0.267373	0.145942	0.373528	0.427257	0.00541437	0.571339	0.273382	0.197548	0.429892	0.285812	0.0580134	0.226958	0.0108555	0.320453	0.194536	0.358295	0.204143	0.0463099	0.0549358	0.0392636
METTL16	0.259508	0.267373	1	0.123392	-0.029444	0.0809291	-0.0602667	0.162611	-0.0129303	0.111287	0.0656553	0.107734	0.260297	0.124536	0.213144	0.178084	0.143909	0.273262	0.478909	0.510959	0.267505	-0.00382024
WTAP	0.0300877	0.145942	0.123392	1	-0.028288	0.184223	-0.271492	0.225982	0.0141338	0.0742055	0.240848	0.055629	0.359065	0.222563	-0.0238487	0.207007	0.109602	0.276617	0.0785149	0.0778821	0.00735403	-0.0224998
ZC3H13	0.287419	0.373528	-0.029444	-0.028288	1	0.060013	-0.232196	0.353645	-0.0415398	0.108961	0.141645	0.20762	-0.023686	0.196997	-0.0558018	0.338989	0.0054656	0.208617	0.111159	-0.15439	-0.09648	-0.0134904
RBM15	0.185872	0.427257	0.0809291	0.184223	0.060013	1	0.123713	0.201806	0.207828	0.335518	0.371603	0.404316	0.0687543	0.346964	0.361807	0.335306	0.254509	0.404823	0.042433	0.0340936	0.200949	0.161932
RBM15B	-0.000623963	0.00541437	-0.0602667	-0.271492	-0.232196	0.123713	1	-0.173737	0.043472	0.196648	0.16977	-0.0280484	0.115334	-0.0991882	0.246469	-0.0470692	0.122174	0.149981	-0.11216	0.0835096	-0.0138377	0.0150302
YTHDC1	0.237051	0.571339	0.162611	0.225982	0.353645	0.201806	-0.173737	1	0.153378	0.119724	0.384241	0.165602	0.0753712	0.287482	-0.0567801	0.223831	0.0446974	0.266151	0.258737	-0.00971251	-0.043385	-0.0376182
YTHDC2	-0.0377714	0.273382	-0.0129303	0.0141338	-0.0415398	0.207828	0.043472	0.153378	1	-0.0326563	0.10895	0.333611	-0.217466	0.128689	0.0331571	-0.0439131	0.155215	-0.0528621	-0.13765	-0.176679	-0.0445459	0.0429303
YTHDF1	0.183583	0.197548	0.111287	0.0742055	0.108961	0.335518	0.196648	0.119724	-0.0326563	1	0.144931	0.168211	0.0459709	0.173965	0.229392	0.177229	0.282806	0.310988	0.00843595	0.104402	-0.0254066	0.0937969
YTHDF2	0.168783	0.429892	0.0656553	0.240848	0.141645	0.371603	0.16977	0.384241	0.10895	0.144931	1	0.119574	0.276365	0.320162	0.10151	0.292463	0.101109	0.381016	0.0587465	0.054578	-0.0899458	-0.0544537
YTHDF3	0.285269	0.285812	0.107734	0.055629	0.20762	0.404316	-0.0280484	0.165602	0.333611	0.168211	0.119574	1	-0.0659188	0.368688	0.354171	0.111297	0.177034	0.13967	-0.0326613	-0.113603	0.0722788	0.0766143
HNRNPC	0.42689	0.0580134	0.260297	0.359065	-0.023686	0.0687543	0.115334	0.0753712	-0.217466	0.0459709	0.276365	-0.0659188	1	0.192007	0.3136	0.412886	0.23829	0.586645	0.214883	0.290917	0.18367	0.196729
FMR1	0.327967	0.226958	0.124536	0.222563	0.196997	0.346964	-0.0991882	0.287482	0.128689	0.173965	0.320162	0.368688	0.192007	1	0.226044	0.176505	0.0818499	0.346973	0.181291	-0.0684266	-0.0757379	-0.00982584
LRPPRC	0.160153	0.0108555	0.213144	-0.0238487	-0.0558018	0.361807	0.246469	-0.0567801	0.0331571	0.229392	0.10151	0.354171	0.3136	0.226044	1	0.28151	0.297055	0.422078	-0.0115893	0.107993	0.204758	0.162834
HNRNPA2B1	0.337674	0.320453	0.178084	0.207007	0.338989	0.335306	-0.0470692	0.223831	-0.0439131	0.177229	0.292463	0.111297	0.412886	0.176505	0.28151	1	0.253807	0.625136	-0.00554643	-0.057383	0.160764	0.365667
IGF2BP1	0.11414	0.194536	0.143909	0.109602	0.0054656	0.254509	0.122174	0.0446974	0.155215	0.282806	0.101109	0.177034	0.23829	0.0818499	0.297055	0.253807	1	0.400852	0.0176252	0.00151274	0.399593	0.214405
RBMX	0.381344	0.358295	0.273262	0.276617	0.208617	0.404823	0.149981	0.266151	-0.0528621	0.310988	0.381016	0.13967	0.586645	0.346973	0.422078	0.625136	0.400852	1	0.170774	0.114012	0.170479	0.144403
FTO	0.214887	0.204143	0.478909	0.0785149	0.111159	0.042433	-0.11216	0.258737	-0.13765	0.00843595	0.0587465	-0.0326613	0.214883	0.181291	-0.0115893	-0.00554643	0.0176252	0.170774	1	0.291161	0.192956	0.07421
ALKBH5	0.205009	0.0463099	0.510959	0.0778821	-0.15439	0.0340936	0.0835096	-0.00971251	-0.176679	0.104402	0.054578	-0.113603	0.290917	-0.0684266	0.107993	-0.057383	0.00151274	0.114012	0.291161	1	0.14866	-0.11326
IGF2BP2	-0.0689866	0.0549358	0.267505	0.00735403	-0.09648	0.200949	-0.0138377	-0.043385	-0.0445459	-0.0254066	-0.0899458	0.0722788	0.18367	-0.0757379	0.204758	0.160764	0.399593	0.170479	0.192956	0.14866	1	0.220033
IGF2BP3	0.0741613	0.0392636	-0.00382024	-0.0224998	-0.0134904	0.161932	0.0150302	-0.0376182	0.0429303	0.0937969	-0.0544537	0.0766143	0.196729	-0.00982584	0.162834	0.365667	0.214405	0.144403	0.07421	-0.11326	0.220033	1

## Sheet: Table. S3
Table. S3: Estimating relative abundance of tumor microenvironment cells in 161 esophageal carcinoma patients by the Single-Sample Gene-Set Enrichment Analysis (ssGSEA)
id	m6Acluster	Activated.B.cellna	Activated.CD4.T.cellna	Activated.CD8.T.cellna	Activated.dendritic.cellna	CD56bright.natural.killer.cellna	CD56dim.natural.killer.cellna	Eosinophilna	Gamma.delta.T.cellna	Immature..B.cellna	Immature.dendritic.cellna	MDSCna	Macrophagena	Mast.cellna	Monocytena	Natural.killer.T.cellna	Natural.killer.cellna	Neutrophilna	Plasmacytoid.dendritic.cellna	Regulatory.T.cellna	T.follicular.helper.cellna	Type.1.T.helper.cellna	Type.17.T.helper.cellna	Type.2.T.helper.cellna
TCGA-2H-A9GF	B	0.176597	0.696056	0.649066	0.533914	0.747919	0.878189	0.282765	0.709665	0.306696	0.805213	0.769909	0.538556	0.466369	0.838743	0.500473	0.735516	0.208711	0.802946	0.719269	0.651612	0.633434	0.58193	0.658639
TCGA-2H-A9GG	B	0.456928	0.716962	0.739191	0.543192	0.718101	0.800473	0.418393	0.695751	0.509697	0.735512	0.796858	0.398666	0.415596	0.805896	0.428598	0.73828	0.303762	0.745698	0.625806	0.613989	0.629062	0.605405	0.660335
TCGA-2H-A9GH	A	0.318081	0.795574	0.688065	0.620842	0.728677	0.803623	0.370819	0.757476	0.408521	0.798649	0.806903	0.525724	0.437737	0.781106	0.515727	0.725902	0.469129	0.766934	0.68835	0.641736	0.621676	0.582575	0.688095
TCGA-2H-A9GI	B	0.435216	0.771143	0.735517	0.596503	0.748247	0.824988	0.373211	0.706593	0.468474	0.743516	0.755288	0.436284	0.349501	0.81736	0.490233	0.704625	0.536234	0.782077	0.594189	0.575434	0.613638	0.602778	0.694589
TCGA-2H-A9GJ	B	0.262025	0.721614	0.60575	0.531996	0.748824	0.8176	0.358109	0.734159	0.338164	0.792619	0.628743	0.438939	0.380431	0.74072	0.456607	0.635197	0.331206	0.700534	0.471055	0.547619	0.577023	0.57719	0.667083
TCGA-2H-A9GK	B	0.553407	0.81725	0.804969	0.687558	0.758879	0.881108	0.519105	0.741448	0.625246	0.784414	0.897139	0.56228	0.558482	0.797367	0.5844	0.763062	0.483468	0.838387	0.787043	0.694407	0.700357	0.672992	0.762667
TCGA-2H-A9GL	A	0.559495	0.851968	0.740447	0.592416	0.733153	0.834671	0.461412	0.6868	0.585949	0.710448	0.807663	0.460886	0.465494	0.784019	0.485564	0.762919	0.231462	0.794767	0.719745	0.630712	0.64185	0.515258	0.73339
TCGA-2H-A9GM	B	0.281591	0.747082	0.653526	0.575093	0.772643	0.858089	0.344899	0.733567	0.377671	0.768079	0.737754	0.453509	0.433927	0.791922	0.487322	0.715295	0.520724	0.741821	0.649797	0.618341	0.611679	0.586863	0.706927
TCGA-2H-A9GN	A	0.152201	0.824874	0.620271	0.637065	0.699515	0.836704	0.401916	0.737369	0.311284	0.747818	0.776717	0.499434	0.502476	0.764745	0.561882	0.695605	0.570678	0.797078	0.730607	0.598918	0.615095	0.599436	0.711437
TCGA-2H-A9GO	A	0.165795	0.735479	0.5168	0.464261	0.686434	0.805246	0.232505	0.679145	0.223957	0.708623	0.604104	0.383612	0.317917	0.7224	0.413812	0.593862	0.28609	0.740013	0.493306	0.485515	0.510555	0.550592	0.66412
TCGA-2H-A9GQ	B	0.101111	0.641794	0.479104	0.455916	0.682727	0.767889	0.317567	0.725109	0.166045	0.719421	0.574384	0.333416	0.370493	0.728519	0.450598	0.652081	0.0766715	0.709137	0.536923	0.487612	0.540646	0.445146	0.680187
TCGA-2H-A9GR	B	0.572686	0.750479	0.699847	0.551062	0.713162	0.847349	0.34435	0.719254	0.568994	0.725247	0.787783	0.462542	0.4463	0.77427	0.469753	0.724189	0.336394	0.736047	0.633931	0.621895	0.628332	0.577415	0.707762
TCGA-IC-A6RE	B	0.603711	0.801755	0.77029	0.632962	0.760001	0.807207	0.409772	0.790186	0.582338	0.772132	0.816915	0.589898	0.581858	0.81961	0.545033	0.73549	0.490357	0.841925	0.726557	0.677789	0.66643	0.586385	0.712951
TCGA-IC-A6RF	B	0.696771	0.746194	0.726147	0.640107	0.801241	0.818922	0.400562	0.694961	0.675473	0.813735	0.816846	0.495118	0.493144	0.782932	0.498124	0.720023	0.533912	0.776581	0.643866	0.62533	0.644844	0.565807	0.637422
TCGA-IG-A3I8	A	0.145493	0.673025	0.60274	0.534116	0.780952	0.751716	0.35674	0.636052	0.305251	0.74769	0.6727	0.378906	0.377113	0.730622	0.523495	0.680306	0.260684	0.77365	0.516628	0.528926	0.524211	0.403704	0.678843
TCGA-IG-A3QL	A	0.266134	0.685125	0.579548	0.564171	0.775147	0.735839	0.279899	0.701036	0.234653	0.775652	0.629064	0.421396	0.448923	0.701588	0.486931	0.678695	0.200675	0.738532	0.55449	0.547832	0.551242	0.427485	0.669548
TCGA-IG-A3YA	B	0.681188	0.881826	0.758114	0.699907	0.800065	0.737267	0.440817	0.764106	0.719208	0.84081	0.911683	0.629557	0.604548	0.810574	0.591552	0.810946	0.420845	0.811787	0.849383	0.719926	0.7089	0.515102	0.725865
TCGA-IG-A3YB	B	0.370054	0.654955	0.76749	0.561928	0.747806	0.782999	0.353251	0.689394	0.480058	0.834908	0.860104	0.481248	0.495785	0.779906	0.508012	0.762108	0.156606	0.779002	0.659934	0.659708	0.653941	0.447194	0.615782
TCGA-IG-A3YC	B	0.551438	0.789301	0.891219	0.681022	0.803861	0.800949	0.408947	0.780523	0.591947	0.81954	0.94607	0.609946	0.587789	0.815825	0.608297	0.782509	0.464537	0.789536	0.844445	0.732071	0.713485	0.493572	0.725079
TCGA-IG-A4P3	B	0.668226	0.874172	0.864365	0.636165	0.797583	0.758518	0.384929	0.707144	0.669602	0.802267	0.875946	0.463561	0.476065	0.743681	0.528624	0.750314	0.338221	0.759364	0.677693	0.64309	0.693441	0.472624	0.726578
TCGA-IG-A4QS	B	0.160624	0.758219	0.745844	0.573355	0.712589	0.799284	0.461409	0.681247	0.366674	0.758703	0.788169	0.450526	0.407571	0.761053	0.493544	0.707489	0.403284	0.808238	0.58816	0.558661	0.546273	0.576432	0.647126
TCGA-IG-A50L	A	0.237431	0.737778	0.659181	0.59351	0.762708	0.777336	0.331264	0.743362	0.409316	0.794212	0.840722	0.470588	0.501276	0.704237	0.502745	0.681654	0.228165	0.757555	0.763604	0.640294	0.624595	0.460724	0.685306
TCGA-IG-A51D	A	0.511312	0.797139	0.783275	0.618784	0.798619	0.754661	0.359847	0.800201	0.579022	0.805314	0.855775	0.558231	0.506312	0.75878	0.619859	0.750176	0.450745	0.793543	0.751884	0.68322	0.682873	0.506413	0.691451
TCGA-IG-A5B8	A	0.250589	0.685862	0.696359	0.610589	0.799108	0.796807	0.27384	0.769354	0.422592	0.793389	0.769387	0.4546	0.302624	0.756327	0.53918	0.671153	0.553372	0.776301	0.671306	0.60696	0.567449	0.438809	0.642522
TCGA-IG-A5S3	A	0.485999	0.759657	0.7092	0.563196	0.783602	0.686992	0.348316	0.686173	0.434998	0.742371	0.735288	0.440124	0.460029	0.715258	0.502051	0.723859	0.266986	0.790919	0.566623	0.604273	0.614251	0.393688	0.693922
TCGA-IG-A625	B	0.448258	0.76107	0.724186	0.604641	0.782945	0.737044	0.406876	0.720654	0.48733	0.807154	0.763157	0.507821	0.523064	0.75691	0.494184	0.722949	0.286594	0.779319	0.647533	0.678048	0.631554	0.443116	0.661682
TCGA-IG-A6QS	B	0.364062	0.801142	0.828205	0.627242	0.821099	0.798728	0.328574	0.732223	0.428463	0.782135	0.84499	0.52492	0.455704	0.719362	0.630869	0.720349	0.453379	0.765043	0.725964	0.686964	0.643331	0.475903	0.705436
TCGA-IG-A7DP	B	0.81918	0.88998	0.968612	0.678417	0.775629	0.797248	0.461308	0.788214	0.823163	0.783911	1	0.699267	0.666954	0.871863	0.643491	0.850752	0.405507	0.798873	0.837617	0.757201	0.783503	0.537054	0.727359
TCGA-IG-A8O2	A	0.356496	0.730987	0.814069	0.585942	0.807689	0.809577	0.358528	0.691043	0.46758	0.799552	0.786535	0.453641	0.401841	0.785312	0.581692	0.743372	0.16483	0.756177	0.589986	0.621112	0.632842	0.471877	0.649964
TCGA-IG-A97H	A	0.241015	0.733501	0.671354	0.657934	0.764919	0.768192	0.29475	0.779217	0.400577	0.785522	0.857597	0.512143	0.413091	0.713505	0.522955	0.672468	0.412422	0.782821	0.791533	0.658258	0.609642	0.451109	0.687471
TCGA-IG-A97I	B	0.162121	0.685631	0.686305	0.600441	0.784414	0.767716	0.243186	0.727819	0.335505	0.813445	0.778029	0.456129	0.425259	0.729114	0.499798	0.735083	0.303878	0.790699	0.686207	0.629748	0.600176	0.519173	0.628848
TCGA-JY-A6FA	B	0.295743	0.701088	0.608537	0.575298	0.76821	0.777776	0.247424	0.702573	0.361645	0.79514	0.67806	0.446573	0.395767	0.722945	0.497921	0.651787	0.36772	0.769857	0.55327	0.568164	0.577523	0.461781	0.613206
TCGA-JY-A6FB	B	0.121088	0.742409	0.581096	0.587045	0.737543	0.849402	0.40126	0.722183	0.338993	0.763856	0.755696	0.433298	0.423262	0.770449	0.503342	0.722794	0.34863	0.743431	0.673402	0.602137	0.594326	0.585343	0.737071
TCGA-JY-A6FD	B	0.401432	0.806473	0.766432	0.603069	0.831507	0.780044	0.350622	0.777667	0.485187	0.79552	0.792023	0.465992	0.425257	0.746398	0.605811	0.712868	0.493835	0.79107	0.708453	0.678003	0.622045	0.565185	0.732795
TCGA-JY-A6FE	B	0.388124	0.754497	0.763319	0.631596	0.778499	0.752856	0.329493	0.77504	0.477916	0.794999	0.906619	0.600556	0.47031	0.799397	0.550646	0.718418	0.364986	0.78913	0.797796	0.683106	0.646494	0.407751	0.702435
TCGA-JY-A6FG	B	0.1401	0.599981	0.681512	0.638302	0.751766	0.814235	0.273343	0.729752	0.268614	0.788011	0.715962	0.357647	0.392198	0.691071	0.483262	0.665903	0.569654	0.75351	0.551726	0.564493	0.556338	0.492119	0.613374
TCGA-JY-A6FH	B	0.193794	0.654609	0.562286	0.46853	0.72605	0.826072	0.213293	0.658843	0.283846	0.729299	0.633108	0.399312	0.228366	0.771968	0.451343	0.632506	0.441381	0.79855	0.416765	0.494952	0.567111	0.588276	0.631411
TCGA-JY-A938	A	0.642728	0.859884	0.838578	0.678855	0.744521	0.837725	0.388454	0.790889	0.63849	0.803638	0.88145	0.571826	0.529064	0.815798	0.559598	0.781202	0.565365	0.796577	0.763337	0.700569	0.699315	0.58612	0.757282
TCGA-JY-A939	B	0.70727	0.824845	0.865543	0.661065	0.74003	0.845915	0.44633	0.769346	0.700668	0.793708	0.897608	0.603184	0.595208	0.832103	0.606347	0.797297	0.503766	0.792684	0.736766	0.716968	0.723494	0.572186	0.731136
TCGA-JY-A93C	B	0.414835	0.751561	0.710467	0.576831	0.711151	0.840156	0.372972	0.745912	0.491251	0.773446	0.793048	0.532837	0.446595	0.800115	0.481482	0.69648	0.49293	0.76141	0.67576	0.614292	0.622186	0.553478	0.656104
TCGA-JY-A93D	B	0.718868	0.839811	0.791167	0.659959	0.744882	0.820868	0.485804	0.784408	0.744518	0.81506	0.929251	0.68538	0.660502	0.849662	0.579607	0.811963	0.469887	0.827643	0.830845	0.731446	0.746499	0.546488	0.751554
TCGA-JY-A93E	B	0.661624	0.803071	0.806854	0.652506	0.72679	0.825078	0.386517	0.759135	0.710421	0.790504	0.90268	0.586271	0.576581	0.822029	0.533629	0.808911	0.442723	0.799557	0.782387	0.691204	0.698008	0.593102	0.705912
TCGA-JY-A93F	B	0.0770438	0.729805	0.641317	0.586057	0.70406	0.801868	0.334489	0.65198	0.305857	0.719439	0.648337	0.312912	0.341989	0.691996	0.449736	0.61565	0.474035	0.735497	0.559216	0.54174	0.503888	0.403892	0.626196
TCGA-KH-A6WC	B	0.405488	0.65728	0.684519	0.55059	0.781739	0.812467	0.304054	0.725341	0.426049	0.7932	0.717095	0.476414	0.506038	0.735999	0.457732	0.68694	0.459694	0.754272	0.61417	0.66899	0.594216	0.492771	0.627368
TCGA-L5-A43C	B	0.615337	0.839766	0.782793	0.735436	0.757591	0.88457	0.505122	0.800924	0.641422	0.820036	0.985263	0.72282	0.657532	0.846507	0.597032	0.778122	0.699398	0.837544	0.902984	0.73412	0.743813	0.634995	0.742381
TCGA-L5-A43E	B	0.415606	0.748532	0.724257	0.571274	0.713028	0.819318	0.347421	0.650292	0.507156	0.730242	0.723938	0.40558	0.365573	0.766418	0.462685	0.687639	0.423833	0.72543	0.543064	0.562267	0.57427	0.579539	0.645483
TCGA-L5-A43J	B	0.121795	0.735839	0.709895	0.562819	0.79358	0.815178	0.267108	0.724084	0.403543	0.786665	0.836428	0.480397	0.470626	0.76719	0.555539	0.720951	0.244784	0.759106	0.680685	0.627339	0.632578	0.543916	0.686655
TCGA-L5-A4OE	B	0.414644	0.844102	0.82396	0.668975	0.771671	0.849301	0.422494	0.734814	0.59218	0.771929	0.857851	0.503264	0.496829	0.760038	0.547801	0.761087	0.569077	0.792489	0.695827	0.684526	0.663495	0.622359	0.700352
TCGA-L5-A4OG	B	0.500424	0.854345	0.804076	0.648209	0.773977	0.881293	0.472932	0.738293	0.587571	0.787342	0.854287	0.521824	0.473905	0.816367	0.582814	0.719022	0.58018	0.787787	0.746791	0.680297	0.667394	0.599053	0.753597
TCGA-L5-A4OH	A	0.259595	0.74264	0.599389	0.512085	0.68247	0.819361	0.303897	0.732199	0.314765	0.706352	0.647331	0.387157	0.315478	0.760849	0.452143	0.640157	0.464288	0.732831	0.580575	0.569449	0.565456	0.504021	0.625566
TCGA-L5-A4OI	B	0.335281	0.714761	0.636092	0.567245	0.696623	0.853706	0.284082	0.711971	0.361572	0.676825	0.702672	0.454126	0.363764	0.76851	0.503383	0.6995	0.32339	0.721513	0.52377	0.573198	0.572906	0.515428	0.612908
TCGA-L5-A4OJ	B	0.460833	0.772031	0.685055	0.571552	0.715522	0.834395	0.282915	0.698244	0.474663	0.696082	0.729217	0.428979	0.381597	0.761878	0.496528	0.641533	0.353234	0.741655	0.559554	0.552002	0.604288	0.639328	0.729765
TCGA-L5-A4OM	B	0.286215	0.743456	0.610142	0.549006	0.79439	0.743782	0.333029	0.656637	0.315203	0.775294	0.716571	0.435305	0.464687	0.700812	0.441678	0.659424	0.413986	0.798991	0.535071	0.554797	0.567558	0.45777	0.704424
TCGA-L5-A4ON	B	0.110625	0.74069	0.613761	0.599514	0.746132	0.791297	0.380172	0.731421	0.336707	0.768631	0.74527	0.467628	0.48005	0.768902	0.503646	0.707682	0.541966	0.756488	0.579741	0.605566	0.601541	0.65482	0.68596
TCGA-L5-A4OO	B	0.654737	0.791321	0.833458	0.632473	0.727908	0.828303	0.427707	0.728133	0.68724	0.754493	0.894668	0.595825	0.594418	0.786477	0.601399	0.798786	0.334823	0.797775	0.728373	0.677973	0.715448	0.571094	0.698893
TCGA-L5-A4OP	B	0.32154	0.757053	0.758004	0.523192	0.736019	0.820791	0.358062	0.675473	0.429528	0.734668	0.787491	0.407727	0.425009	0.79415	0.528792	0.728276	0.571545	0.773711	0.613251	0.586558	0.65018	0.542355	0.61371
TCGA-L5-A4OS	B	0.606883	0.883369	0.812958	0.686067	0.723836	0.847552	0.457262	0.84193	0.636717	0.845205	0.941183	0.637158	0.458691	0.86255	0.615487	0.769652	0.597967	0.838631	0.890976	0.681217	0.680635	0.586478	0.700495
TCGA-L5-A4OT	B	0.449865	0.858811	0.73501	0.64006	0.771564	0.84944	0.466477	0.689851	0.54534	0.799544	0.860016	0.579674	0.65282	0.795304	0.556791	0.77237	0.412715	0.801427	0.695976	0.702552	0.685477	0.615553	0.760485
TCGA-L5-A4OU	B	0.613027	0.86795	0.883013	0.670342	0.792213	0.833853	0.401976	0.775014	0.672255	0.788399	0.923193	0.643472	0.686712	0.819882	0.669179	0.79559	0.426525	0.816987	0.782869	0.698405	0.711645	0.552114	0.765409
TCGA-L5-A4OW	A	0.371848	0.828621	0.728321	0.633525	0.733223	0.85211	0.352785	0.723283	0.455832	0.751796	0.802819	0.466296	0.387582	0.802884	0.500818	0.719961	0.527098	0.794829	0.655835	0.609962	0.616992	0.620868	0.716612
TCGA-L5-A4OX	A	0.261602	0.849863	0.742475	0.528804	0.726254	0.83787	0.443559	0.672425	0.384629	0.740123	0.747032	0.429659	0.509315	0.783311	0.51468	0.690022	0.304637	0.746662	0.605135	0.598606	0.622078	0.552464	0.71371
TCGA-L5-A88S	B	0.314269	0.673234	0.63401	0.638137	0.795786	0.752624	0.416804	0.831547	0.414709	0.829896	0.856379	0.664933	0.686025	0.812818	0.593276	0.771183	0.438429	0.833272	0.783907	0.700757	0.66633	0.474992	0.671239
TCGA-L5-A88T	B	0.544563	0.704793	0.740605	0.595123	0.788717	0.822317	0.397004	0.794775	0.568776	0.834287	0.799121	0.579225	0.620521	0.805303	0.518876	0.747283	0.563189	0.806001	0.721395	0.723175	0.660456	0.526306	0.672969
TCGA-L5-A88V	B	0.206239	0.724252	0.607137	0.571742	0.783617	0.859105	0.307974	0.726593	0.338565	0.83103	0.759078	0.46161	0.380928	0.802365	0.51975	0.687462	0.446067	0.74805	0.599233	0.609426	0.58119	0.60483	0.735782
TCGA-L5-A88W	B	0.262356	0.707418	0.61463	0.643176	0.780554	0.76225	0.350197	0.757289	0.374494	0.797472	0.757237	0.469824	0.437817	0.722097	0.531316	0.672619	0.615502	0.79416	0.688933	0.625076	0.588697	0.534835	0.676168
TCGA-L5-A88Y	B	0.31746	0.747261	0.770851	0.687098	0.787938	0.853892	0.432394	0.810161	0.515024	0.836569	0.902143	0.623429	0.637972	0.843158	0.60148	0.768697	0.78326	0.860549	0.791288	0.751533	0.690258	0.664828	0.725993
TCGA-L5-A88Z	B	0.328372	0.675506	0.668789	0.599808	0.775279	0.738102	0.38308	0.757645	0.351842	0.772035	0.752591	0.512396	0.585555	0.722805	0.476278	0.68203	0.443626	0.788238	0.670755	0.648359	0.608637	0.522951	0.640122
TCGA-L5-A891	B	0.130177	0.742057	0.598039	0.521858	0.739086	0.849291	0.327157	0.706054	0.306619	0.760123	0.730001	0.432306	0.351932	0.773304	0.512156	0.692445	0.486301	0.790193	0.650784	0.605027	0.579854	0.572864	0.649215
TCGA-L5-A893	B	0.733103	0.844261	0.800081	0.646117	0.771214	0.875821	0.496855	0.768375	0.724034	0.797704	0.855608	0.523114	0.55612	0.825075	0.541249	0.734203	0.550352	0.781758	0.686294	0.701355	0.691411	0.569857	0.728433
TCGA-L5-A8NE	B	0.295022	0.754642	0.718333	0.544678	0.701433	0.837922	0.312629	0.732379	0.404291	0.716481	0.781745	0.442165	0.39458	0.793046	0.464027	0.694628	0.464446	0.748289	0.561932	0.609578	0.611339	0.58156	0.669258
TCGA-L5-A8NF	B	0.102192	0.682442	0.538736	0.512779	0.685057	0.798549	0.314444	0.707116	0.238058	0.702928	0.705006	0.423948	0.377222	0.702256	0.444921	0.666114	0.386631	0.727301	0.552976	0.532414	0.563721	0.563021	0.651951
TCGA-L5-A8NG	B	0.607456	0.80182	0.733068	0.613488	0.731343	0.825757	0.469461	0.74106	0.623757	0.781934	0.803189	0.549149	0.55482	0.825287	0.535284	0.75671	0.456937	0.818134	0.738348	0.657263	0.664894	0.5818	0.733685
TCGA-L5-A8NH	A	0.468476	0.840598	0.767844	0.615779	0.711556	0.858924	0.441202	0.753265	0.51958	0.726368	0.796943	0.50286	0.471364	0.781625	0.509178	0.724487	0.492696	0.770606	0.661035	0.623413	0.630193	0.601036	0.738718
TCGA-L5-A8NI	A	0.236292	0.794774	0.763091	0.551317	0.744035	0.861891	0.340293	0.709943	0.319724	0.786469	0.768034	0.455593	0.458389	0.777596	0.551753	0.760126	0.303147	0.776347	0.661326	0.623525	0.662397	0.570125	0.724424
TCGA-L5-A8NJ	B	0.345216	0.728551	0.627204	0.504228	0.730394	0.819068	0.283411	0.658283	0.379426	0.685352	0.69929	0.366053	0.347768	0.76122	0.423575	0.649263	0.262309	0.730255	0.481883	0.498576	0.555861	0.500297	0.683298
TCGA-L5-A8NK	B	0.336883	0.740806	0.75985	0.586157	0.805118	0.778203	0.341896	0.712445	0.394965	0.804356	0.754424	0.477205	0.575123	0.760511	0.489143	0.723597	0.40126	0.774031	0.629191	0.679389	0.624587	0.481296	0.700203
TCGA-L5-A8NL	B	0.298315	0.794467	0.701725	0.600442	0.769639	0.815902	0.455982	0.729856	0.468761	0.812208	0.897957	0.631112	0.719641	0.798705	0.583596	0.783044	0.423227	0.8156	0.774397	0.699992	0.723421	0.588422	0.735877
TCGA-L5-A8NM	A	0.459023	0.861907	0.818194	0.681654	0.713112	0.853636	0.467781	0.742365	0.573238	0.765882	0.906836	0.540144	0.461514	0.823357	0.584727	0.785571	0.552694	0.806546	0.710198	0.674999	0.666253	0.618397	0.737272
TCGA-L5-A8NN	A	0.370517	0.806383	0.715311	0.588609	0.702654	0.832684	0.358357	0.786169	0.390963	0.779027	0.791189	0.540035	0.407963	0.817992	0.541019	0.726899	0.417382	0.779879	0.682793	0.623821	0.631077	0.523822	0.669751
TCGA-L5-A8NQ	B	0.561282	0.727429	0.794742	0.614719	0.816151	0.802532	0.390028	0.758105	0.553727	0.818201	0.846412	0.596055	0.623867	0.781104	0.577158	0.759512	0.55133	0.795479	0.723735	0.731343	0.671553	0.570103	0.671986
TCGA-L5-A8NR	B	0.169225	0.708162	0.604963	0.589715	0.714401	0.837142	0.233807	0.758538	0.405169	0.776468	0.79864	0.473669	0.448262	0.739138	0.49458	0.721872	0.43698	0.794774	0.718392	0.621615	0.59523	0.577686	0.647327
TCGA-L5-A8NS	B	0.355809	0.797864	0.772554	0.633457	0.72552	0.818546	0.376902	0.726954	0.549778	0.779988	0.890239	0.512059	0.581167	0.781252	0.563939	0.787806	0.379815	0.770933	0.760198	0.668697	0.676209	0.605254	0.72707
TCGA-L5-A8NT	B	0.562547	0.789936	0.755291	0.638361	0.749339	0.88096	0.496842	0.76632	0.619904	0.788635	0.85618	0.614036	0.627681	0.810883	0.556875	0.806789	0.37204	0.853083	0.826621	0.677422	0.691095	0.582543	0.749099
TCGA-L5-A8NU	B	0.778905	0.812583	0.875015	0.667655	0.756149	0.838269	0.502364	0.725608	0.764526	0.799716	0.965077	0.640494	0.640516	0.857163	0.576601	0.808241	0.51076	0.828402	0.774131	0.722655	0.769879	0.624843	0.757335
TCGA-L5-A8NV	B	0.631149	0.799441	0.760351	0.606273	0.759294	0.829815	0.463072	0.727381	0.679422	0.794875	0.883664	0.556684	0.561187	0.795166	0.520669	0.755586	0.533611	0.816473	0.724487	0.676206	0.676271	0.591011	0.743061
TCGA-L5-A8NW	B	0.385632	0.782204	0.744269	0.578352	0.794743	0.826797	0.432711	0.75417	0.507209	0.793195	0.843465	0.536233	0.616793	0.769078	0.537262	0.751967	0.564064	0.838079	0.723507	0.714475	0.650304	0.558136	0.733285
TCGA-L7-A56G	B	0.32715	0.753609	0.734424	0.585228	0.795112	0.777224	0.356341	0.726893	0.42148	0.768823	0.748135	0.444738	0.452657	0.727224	0.524884	0.702387	0.478149	0.782702	0.648319	0.662579	0.608373	0.492824	0.703267
TCGA-L7-A6VZ	B	0.208258	0.772338	0.702614	0.587941	0.74939	0.832985	0.399139	0.775676	0.35699	0.767503	0.75764	0.463686	0.530163	0.746746	0.511021	0.708999	0.403992	0.758716	0.649587	0.602731	0.595415	0.615268	0.697335
TCGA-LN-A49M	B	0.170147	0.671686	0.537448	0.557044	0.773542	0.811103	0.298596	0.704695	0.364489	0.744192	0.726388	0.442743	0.421236	0.713376	0.497721	0.660791	0.415676	0.740578	0.691313	0.628776	0.557041	0.508769	0.665401
TCGA-LN-A49O	B	0.3881	0.853228	0.832334	0.636461	0.794397	0.818754	0.370548	0.800963	0.573887	0.808656	0.877457	0.507922	0.512573	0.72772	0.634208	0.74126	0.393285	0.803024	0.809689	0.705345	0.694926	0.475777	0.757959
TCGA-LN-A49P	B	0.467469	0.858797	0.871591	0.642156	0.780933	0.775419	0.379724	0.755071	0.559084	0.858953	0.939017	0.591083	0.601747	0.769814	0.614609	0.799381	0.320667	0.817593	0.801546	0.740446	0.717665	0.498918	0.696819
TCGA-LN-A49S	A	0.374283	0.762311	0.751965	0.612799	0.7842	0.773147	0.292082	0.712063	0.421965	0.817619	0.768654	0.454367	0.398605	0.744263	0.490939	0.690903	0.559839	0.767958	0.601177	0.629587	0.603038	0.469723	0.691278
TCGA-LN-A49U	A	0.171947	0.651635	0.518755	0.561177	0.76637	0.751585	0.216792	0.745167	0.20765	0.756939	0.670505	0.373076	0.386115	0.711539	0.491374	0.649593	0.242298	0.753494	0.637381	0.584951	0.538337	0.437017	0.676679
TCGA-LN-A49W	B	0.612411	0.846948	0.845189	0.666886	0.800525	0.773964	0.423461	0.763987	0.666291	0.867855	0.951409	0.582083	0.552642	0.785544	0.601429	0.790456	0.354502	0.836518	0.85102	0.729698	0.709638	0.498788	0.739648
TCGA-LN-A49X	B	0.568638	0.799813	0.746241	0.629772	0.802415	0.805656	0.399301	0.741189	0.614908	0.801996	0.836975	0.537788	0.509669	0.752459	0.602012	0.781148	0.358756	0.785646	0.777465	0.689466	0.673241	0.46664	0.730007
TCGA-LN-A49Y	A	0.2523	0.670556	0.661004	0.521402	0.77147	0.775672	0.226907	0.681335	0.292153	0.752554	0.67115	0.355227	0.356822	0.699659	0.475801	0.682296	0.230507	0.757823	0.500943	0.563899	0.538966	0.407321	0.598608
TCGA-LN-A4A1	B	0.229362	0.630851	0.57069	0.620333	0.790508	0.808453	0.267367	0.762354	0.360467	0.775205	0.805277	0.484188	0.440755	0.721564	0.538744	0.706236	0.387055	0.772388	0.772991	0.642049	0.579513	0.463306	0.631884
TCGA-LN-A4A3	A	0.497582	0.737803	0.656692	0.633304	0.800282	0.756507	0.261924	0.733856	0.541778	0.790566	0.742635	0.475308	0.407836	0.727893	0.52165	0.672224	0.538989	0.792621	0.650134	0.601427	0.609737	0.542186	0.645046
TCGA-LN-A4A4	B	0.158603	0.628118	0.583067	0.524747	0.7793	0.754987	0.242804	0.70945	0.288799	0.795447	0.726194	0.415226	0.46383	0.685116	0.471927	0.700211	0.0368969	0.732218	0.676797	0.596548	0.575084	0.485046	0.618909
TCGA-LN-A4A5	B	0.392865	0.774245	0.696074	0.603861	0.747921	0.776631	0.416848	0.763582	0.52391	0.822041	0.821335	0.532336	0.533434	0.805658	0.549173	0.766307	0.191389	0.800584	0.791922	0.672151	0.689066	0.494404	0.707531
TCGA-LN-A4A8	B	0.462522	0.832883	0.737725	0.629077	0.785385	0.796605	0.377269	0.717048	0.479979	0.754629	0.826658	0.494778	0.480502	0.755884	0.591306	0.729091	0.241964	0.749472	0.685219	0.633638	0.683328	0.500266	0.721365
TCGA-LN-A4A9	B	0.239584	0.729931	0.791262	0.629443	0.793004	0.821534	0.372369	0.744381	0.474761	0.754594	0.896163	0.495588	0.496096	0.706405	0.594843	0.749778	0.428209	0.789902	0.782535	0.689511	0.666096	0.452929	0.687252
TCGA-LN-A4MQ	B	0.104303	0.644521	0.431227	0.492114	0.785139	0.729822	0.307835	0.691234	0.181369	0.770668	0.543879	0.387828	0.359405	0.684242	0.41625	0.677811	0.229989	0.742004	0.514124	0.580496	0.512485	0.406693	0.642576
TCGA-LN-A5U5	A	0.465736	0.802977	0.742645	0.6378	0.823383	0.765376	0.376757	0.76584	0.516487	0.824207	0.794015	0.559744	0.52287	0.760041	0.567007	0.732438	0.405349	0.760205	0.683346	0.634679	0.655987	0.46921	0.747994
TCGA-LN-A5U6	B	0.233917	0.731568	0.703632	0.595849	0.800274	0.818565	0.280112	0.733832	0.383292	0.76755	0.805563	0.462148	0.435356	0.712684	0.605666	0.735494	0.282558	0.772603	0.726354	0.639298	0.646122	0.465514	0.727541
TCGA-LN-A5U7	B	0.290127	0.764221	0.682961	0.58673	0.793823	0.75198	0.245942	0.759762	0.39438	0.755682	0.745594	0.452197	0.439446	0.692189	0.534082	0.670527	0.28804	0.736166	0.704962	0.568383	0.617283	0.429852	0.712645
TCGA-LN-A7HV	B	0.261859	0.713858	0.704685	0.597379	0.779926	0.783375	0.307433	0.767147	0.367857	0.771557	0.750068	0.459368	0.529377	0.783849	0.542883	0.70085	0.403689	0.769003	0.640244	0.612754	0.608888	0.455698	0.681873
TCGA-LN-A7HW	B	0.161082	0.646483	0.563071	0.575745	0.792573	0.759989	0.298308	0.737346	0.261813	0.785469	0.72468	0.483282	0.441614	0.690705	0.491534	0.691249	0.231517	0.758723	0.680958	0.618315	0.604684	0.465972	0.671846
TCGA-LN-A7HX	B	0.225398	0.680526	0.686957	0.626825	0.784532	0.780241	0.310936	0.736575	0.451726	0.783755	0.816296	0.488008	0.455502	0.715448	0.562819	0.707097	0.41962	0.773358	0.734555	0.670343	0.618839	0.47721	0.68379
TCGA-LN-A7HY	B	0.386418	0.690041	0.77046	0.559436	0.786883	0.776441	0.284943	0.73164	0.439087	0.799393	0.8113	0.536515	0.457098	0.782758	0.591528	0.759546	0.299873	0.766426	0.729973	0.661039	0.664894	0.500219	0.664012
TCGA-LN-A7HZ	A	0.409162	0.820707	0.889592	0.634107	0.830056	0.784025	0.31022	0.748773	0.486259	0.810642	0.897643	0.58126	0.579934	0.76599	0.582112	0.755519	0.218646	0.770741	0.767073	0.692026	0.672987	0.401505	0.701629
TCGA-LN-A8HZ	A	0.349807	0.737561	0.625498	0.600558	0.813742	0.786109	0.320153	0.687624	0.35382	0.78961	0.659274	0.469142	0.400057	0.715975	0.458976	0.653097	0.413273	0.768832	0.575329	0.587945	0.563264	0.49268	0.661207
TCGA-LN-A8I0	B	0.137264	0.68108	0.678439	0.598826	0.783219	0.826827	0.258111	0.690658	0.308153	0.779038	0.728083	0.453556	0.40568	0.70138	0.486546	0.673633	0.349961	0.74381	0.602868	0.591116	0.566855	0.439954	0.639799
TCGA-LN-A8I1	B	0.360985	0.779801	0.847487	0.658873	0.787628	0.784955	0.352769	0.733775	0.438673	0.791926	0.840408	0.518197	0.4772	0.740891	0.563006	0.699338	0.458891	0.777369	0.677425	0.621437	0.633989	0.543549	0.684314
TCGA-LN-A9FO	A	0.300323	0.86126	0.864692	0.591414	0.730563	0.737584	0.325481	0.627433	0.40009	0.731431	0.771696	0.361944	0.365902	0.704011	0.47319	0.646	0.095564	0.729365	0.564684	0.548632	0.527312	0.503727	0.68737
TCGA-LN-A9FP	B	0.50322	0.716349	0.695619	0.61263	0.786927	0.718422	0.414337	0.770995	0.546306	0.869815	0.842068	0.614272	0.719123	0.769683	0.586022	0.813422	0.293716	0.80154	0.7616	0.705522	0.71163	0.489554	0.688644
TCGA-LN-A9FQ	B	0.204571	0.712727	0.63653	0.602	0.794615	0.769351	0.288368	0.746533	0.348058	0.816527	0.798272	0.537047	0.519041	0.720089	0.497951	0.721652	0.29626	0.75632	0.708698	0.647821	0.624643	0.456391	0.653897
TCGA-LN-A9FR	B	0.300845	0.756015	0.680162	0.612721	0.811123	0.846612	0.318343	0.784871	0.460363	0.816442	0.835868	0.575312	0.471781	0.785755	0.56082	0.743065	0.209381	0.790511	0.811905	0.697912	0.666786	0.462593	0.694997
TCGA-M9-A5M8	B	0.484412	0.804048	0.71854	0.641656	0.769002	0.808631	0.384841	0.738546	0.524803	0.824721	0.834514	0.496812	0.502385	0.778144	0.510698	0.714359	0.553726	0.805004	0.678967	0.657884	0.648538	0.596721	0.75886
TCGA-Q9-A6FW	B	0.563762	0.766522	0.764724	0.637646	0.800887	0.829347	0.441445	0.765073	0.609173	0.84849	0.824235	0.572633	0.591849	0.798056	0.542994	0.746009	0.685622	0.823471	0.672799	0.70089	0.683039	0.639755	0.759061
TCGA-R6-A6DN	A	0.264821	0.823512	0.752956	0.583702	0.713768	0.80495	0.294373	0.777644	0.439194	0.754665	0.814722	0.487782	0.421383	0.781969	0.582888	0.745215	0.314671	0.779347	0.760829	0.640089	0.650175	0.60318	0.694842
TCGA-R6-A6DQ	A	0.482861	0.870222	0.78567	0.649525	0.765222	0.841312	0.43324	0.748427	0.566751	0.790089	0.860448	0.561139	0.580006	0.804437	0.550695	0.74411	0.594874	0.823959	0.720355	0.666958	0.696149	0.650126	0.785886
TCGA-R6-A6KZ	A	0.454493	0.7781	0.739395	0.596507	0.73515	0.805783	0.252349	0.734639	0.405238	0.738549	0.809705	0.473903	0.45981	0.823703	0.516118	0.724048	0.344948	0.77732	0.683058	0.638969	0.654732	0.511124	0.688948
TCGA-R6-A6L4	A	0.128098	0.662876	0.583101	0.520609	0.779761	0.859165	0.269205	0.682925	0.228465	0.769093	0.631531	0.387379	0.358107	0.758609	0.467119	0.669113	0.604944	0.75253	0.475666	0.566464	0.538203	0.576921	0.683056
TCGA-R6-A6XG	A	0.152372	0.686362	0.575374	0.451883	0.699373	0.813719	0.218263	0.683349	0.172013	0.732174	0.570745	0.295661	0.266238	0.706776	0.426596	0.631791	0.151548	0.684605	0.484821	0.499606	0.525142	0.54813	0.651445
TCGA-R6-A6XQ	B	0.125286	0.64357	0.462711	0.428499	0.761153	0.791535	0.260509	0.591127	0.211267	0.687915	0.533042	0.260529	0.20289	0.761749	0.406322	0.621823	0.488526	0.692988	0.378332	0.418128	0.478935	0.563686	0.671314
TCGA-R6-A6Y0	B	0.294342	0.721578	0.709209	0.609288	0.788478	0.862896	0.394706	0.751734	0.432239	0.840476	0.78195	0.515627	0.516405	0.769142	0.525607	0.714255	0.678226	0.827851	0.651747	0.699985	0.613746	0.623734	0.676822
TCGA-R6-A8W5	A	0.486498	0.814508	0.727739	0.6841	0.746965	0.830864	0.415971	0.780515	0.580126	0.809914	0.873527	0.575656	0.556731	0.831394	0.573313	0.738359	0.659563	0.81832	0.808111	0.662358	0.681994	0.62278	0.737579
TCGA-R6-A8W8	B	0.326174	0.757175	0.755729	0.588169	0.719554	0.846216	0.311536	0.742984	0.473975	0.724469	0.745203	0.417374	0.323289	0.767223	0.532384	0.687953	0.520024	0.741521	0.610503	0.615659	0.595015	0.608342	0.707993
TCGA-R6-A8WC	A	0	0.678851	0.541352	0.500992	0.674134	0.846299	0.181315	0.67974	0.155524	0.713948	0.555246	0.348782	0.192086	0.725027	0.427182	0.617789	0.254487	0.736056	0.533346	0.494947	0.476056	0.516524	0.643694
TCGA-R6-A8WG	A	0.367677	0.790238	0.728145	0.574807	0.731079	0.783806	0.333002	0.719261	0.42597	0.755036	0.796228	0.475658	0.506353	0.819649	0.517781	0.741537	0.260021	0.801907	0.74138	0.637681	0.630918	0.446538	0.702522
TCGA-RE-A7BO	A	0.267839	0.765557	0.692684	0.660128	0.723854	0.851565	0.407589	0.757073	0.420715	0.772736	0.826854	0.560293	0.489647	0.811091	0.51265	0.723909	0.622897	0.810072	0.727838	0.628793	0.600666	0.577729	0.665525
TCGA-S8-A6BV	B	0.281397	0.691382	0.618888	0.597172	0.775805	0.857726	0.425123	0.762693	0.33103	0.797883	0.827183	0.541735	0.501287	0.841632	0.515602	0.71917	0.420435	0.830051	0.719584	0.670342	0.61947	0.58794	0.643635
TCGA-S8-A6BW	B	0.217278	0.690344	0.542776	0.562432	0.793383	0.779764	0.277971	0.694641	0.312629	0.810286	0.733082	0.522222	0.461974	0.734177	0.513722	0.72021	0.259205	0.77805	0.675655	0.614946	0.594352	0.505976	0.667623
TCGA-V5-A7RB	A	0.243731	0.741136	0.670465	0.592169	0.748826	0.87354	0.329263	0.741075	0.349	0.804755	0.722806	0.410926	0.403364	0.781292	0.484026	0.704814	0.54934	0.822607	0.638386	0.657083	0.600415	0.573151	0.692496
TCGA-V5-A7RC	B	0.130399	0.660299	0.653164	0.609821	0.790646	0.772847	0.230337	0.700835	0.267938	0.748931	0.655312	0.394193	0.452178	0.682622	0.485218	0.680175	0.40175	0.802489	0.609358	0.542266	0.587647	0.432469	0.600904
TCGA-V5-A7RE	B	0.142027	0.760063	0.696334	0.530161	0.740798	0.851064	0.226964	0.688011	0.271028	0.706004	0.699454	0.442935	0.383911	0.754725	0.496688	0.641216	0.29541	0.737474	0.524358	0.533343	0.545906	0.563935	0.701206
TCGA-V5-AASV	A	0.362361	0.737472	0.835093	0.547338	0.741658	0.780286	0.211163	0.615103	0.4644	0.745984	0.798178	0.388003	0.376012	0.732391	0.489639	0.674799	0.326121	0.754124	0.592915	0.632718	0.590754	0.418928	0.668925
TCGA-V5-AASW	A	0.153747	0.756663	0.64319	0.546429	0.713224	0.830292	0.293935	0.69093	0.359516	0.728947	0.646026	0.420643	0.229633	0.766319	0.453043	0.66277	0.468433	0.765662	0.543087	0.552736	0.56667	0.553196	0.663879
TCGA-V5-AASX	B	0.384486	0.795572	0.819791	0.613795	0.73577	0.829095	0.351562	0.768811	0.492687	0.712803	0.815965	0.477117	0.433093	0.7958	0.551738	0.74419	0.425557	0.786932	0.680758	0.681686	0.655124	0.606331	0.721486
TCGA-VR-A8EO	A	0.27555	0.761106	0.632403	0.510513	0.740114	0.66525	0.345616	0.651625	0.315324	0.702878	0.741763	0.458029	0.439364	0.704584	0.468062	0.653247	0.0933354	0.758509	0.595095	0.552744	0.55171	0.376413	0.710171
TCGA-VR-A8EP	B	0.263273	0.758284	0.598149	0.546575	0.808542	0.742501	0.321031	0.646408	0.335158	0.777149	0.6621	0.415546	0.313847	0.700524	0.428582	0.63561	0.430136	0.770053	0.555903	0.642801	0.534785	0.548155	0.655319
TCGA-VR-A8EQ	B	0.273347	0.796101	0.805992	0.697659	0.764139	0.869021	0.360916	0.7575	0.482116	0.762627	0.889493	0.491774	0.428571	0.806124	0.555184	0.719593	0.517223	0.772755	0.718389	0.633168	0.655848	0.685363	0.713518
TCGA-VR-A8ER	B	0.425291	0.778231	0.698775	0.616266	0.772003	0.746385	0.357528	0.747676	0.5197	0.814766	0.813894	0.517987	0.495548	0.695299	0.520127	0.72417	0.31714	0.774285	0.731206	0.671426	0.638974	0.567269	0.6676
TCGA-VR-A8ET	B	0.123167	0.665445	0.585715	0.58027	0.756424	0.754383	0.267228	0.687234	0.289385	0.795375	0.683492	0.447499	0.335404	0.691467	0.404373	0.677072	0.573023	0.778066	0.543767	0.564254	0.500201	0.48247	0.673801
TCGA-VR-A8EU	B	0.30507	0.758227	0.71624	0.638428	0.794199	0.779073	0.286428	0.793132	0.448811	0.808752	0.845641	0.52227	0.415042	0.744256	0.602028	0.707858	0.467755	0.779787	0.764928	0.663248	0.633988	0.432881	0.694792
TCGA-VR-A8EW	B	0.454703	0.723876	0.602087	0.560776	0.804065	0.780839	0.317294	0.693081	0.443927	0.814413	0.722589	0.472417	0.494162	0.738577	0.467873	0.667954	0.419259	0.770679	0.625176	0.61642	0.579727	0.512898	0.630192
TCGA-VR-A8EX	B	0.702069	0.754994	0.759172	0.605288	0.775652	0.813526	0.269987	0.684944	0.647286	0.759344	0.750947	0.439978	0.394124	0.772141	0.477866	0.666532	0.484677	0.730106	0.541208	0.621442	0.611719	0.512196	0.643379
TCGA-VR-A8EY	B	0.313106	0.724785	0.665454	0.575451	0.814931	0.841097	0.315929	0.752538	0.353818	0.773282	0.708471	0.472507	0.468423	0.720116	0.537654	0.67192	0.29274	0.78581	0.649323	0.586321	0.572206	0.468269	0.702987
TCGA-VR-A8EZ	B	0.319177	0.761462	0.753721	0.580515	0.793648	0.79468	0.238372	0.718509	0.335268	0.772976	0.780379	0.521266	0.37806	0.731157	0.589166	0.738403	0.187527	0.734955	0.698185	0.630103	0.637314	0.401709	0.66886
TCGA-VR-A8Q7	A	0.218821	0.749726	0.713736	0.55356	0.746888	0.741436	0.206637	0.701267	0.339998	0.740561	0.798928	0.461165	0.259889	0.693457	0.466101	0.67516	0.312949	0.700285	0.676263	0.600223	0.544079	0.368159	0.690261
TCGA-VR-AA4D	A	0.195674	0.737459	0.607196	0.462339	0.695865	0.803166	0.3579	0.685051	0.286677	0.777718	0.617546	0.329867	0.292235	0.708505	0.425618	0.60895	0.249811	0.718655	0.470197	0.454727	0.504088	0.446256	0.655657
TCGA-VR-AA4G	A	0.317739	0.79449	0.804441	0.611218	0.795893	0.788084	0.324348	0.716801	0.453313	0.778569	0.775686	0.489078	0.463242	0.744823	0.563298	0.733825	0.315872	0.794846	0.671919	0.647177	0.658501	0.543469	0.713499
TCGA-VR-AA7I	B	0.352716	0.809038	0.878563	0.591506	0.813113	0.807529	0.377247	0.767934	0.502175	0.785487	0.874995	0.518625	0.531296	0.766155	0.619874	0.799296	0.34978	0.772116	0.738876	0.732103	0.709393	0.530344	0.730709
TCGA-XP-A8T6	B	0.442464	0.713162	0.641663	0.601653	0.833582	0.758658	0.380744	0.748542	0.420224	0.827707	0.750463	0.518515	0.590409	0.769013	0.532107	0.74083	0.453499	0.786358	0.637156	0.648772	0.620016	0.490042	0.684668
TCGA-XP-A8T8	A	0.214408	0.750257	0.712507	0.56165	0.809622	0.74759	0.246142	0.674096	0.312888	0.794522	0.708824	0.406861	0.422373	0.703402	0.49319	0.680901	0.344824	0.755346	0.551678	0.593165	0.58363	0.497558	0.664165
TCGA-Z6-A8JD	B	0.759146	0.826001	0.735194	0.588608	0.803486	0.791794	0.363944	0.69354	0.71791	0.79989	0.805012	0.501232	0.487637	0.779468	0.577644	0.7096	0.359132	0.787235	0.712515	0.639864	0.66005	0.4991	0.702412
TCGA-Z6-A8JE	A	0.268843	0.710199	0.611569	0.572842	0.760474	0.766537	0.256942	0.682903	0.322285	0.76742	0.79161	0.440429	0.384962	0.660553	0.47783	0.674156	0.18622	0.751387	0.643021	0.597324	0.561986	0.475293	0.671334
TCGA-Z6-A9VB	A	0.52704	0.736134	0.660401	0.534428	0.799721	0.770301	0.268246	0.673844	0.503723	0.782363	0.719366	0.472966	0.448584	0.72281	0.446241	0.656721	0.349902	0.767824	0.556461	0.60987	0.572551	0.459257	0.640467
TCGA-Z6-AAPN	A	0.406326	0.820423	0.814695	0.688527	0.812504	0.786762	0.30446	0.790787	0.504567	0.789256	0.900388	0.54461	0.428184	0.77001	0.585772	0.739253	0.559251	0.796609	0.731096	0.69653	0.63898	0.525075	0.705583
TCGA-ZR-A9CJ	A	0.204354	0.81398	0.667657	0.596476	0.74894	0.806103	0.446806	0.752912	0.367978	0.780972	0.805146	0.561465	0.623135	0.780957	0.597152	0.738916	0.479884	0.832078	0.728041	0.637488	0.66425	0.583907	0.702052

## Sheet: Table. S4
Table. S4: Functional annotation for m6A phenotype -related genes (Gene Ontology-Biological process)
ONTOLOGY	ID	Description	GeneRatio	BgRatio	pvalue	p.adjust	qvalue	geneID	Count
BP	GO:0006260	DNA replication	63/443	273/18866	2.2526e-44	6.31178e-41	4.83004e-41	DNA2/NASP/CHEK1/EME1/ORC6/CDK1/CACYBP/RPA3/PRIM1/FBXO5/MCM10/GEN1/MCM6/POLD1/SMC3/MCM8/GMNN/CDC7/GINS1/POLE2/MMS22L/PIF1/MGME1/LIG1/ORC1/FEN1/RRM2/PRIM2/CLSPN/FAM111B/RMI2/RECQL4/CHEK2/CHTF18/PCNA/TIPIN/CHAF1B/BARD1/CDK2/DHX9/CCNA2/RFWD3/DTL/GTPBP4/MCM4/TONSL/RAD51/THOC1/CDT1/DNAJC2/SSRP1/RFC5/EXO1/MCIDAS/RFC3/ORC3/BRCA1/RPA2/DONSON/ZGRF1/GINS4/ZNF830/DBF4	63
BP	GO:0140014	mitotic nuclear division	55/443	286/18866	2.65033e-34	3.71312e-31	2.84144e-31	HNRNPU/NDC80/CHEK1/KIF20B/TTK/NUF2/CENPK/NEK2/CDK1/KNSTRN/UBE2C/FBXO5/NUP62/TPX2/CENPE/KIF18A/GEN1/KIF22/BUB3/AURKA/RCC1/NCAPG/SMC3/NSL1/KPNB1/BUB1B/KIF11/BCCIP/NCAPG2/MAD2L1/SPDL1/KIF2C/DSN1/NCAPH/CDC25C/KIF14/CCNB1/KNTC1/CHEK2/CDCA5/BUB1/ZWINT/KIF4A/PLK1/CDCA8/BORA/CDT1/KIFC1/AURKB/MZT1/RAN/KIF23/KIF4B/CDC23/AAAS	55
BP	GO:0000280	nuclear division	65/443	428/18866	5.25586e-34	4.90898e-31	3.75656e-31	HNRNPU/FIGNL1/NDC80/CHEK1/KIF20B/EME1/TTK/NUF2/FANCA/CENPK/NEK2/CDK1/KNSTRN/UBE2C/FBXO5/NUP62/TPX2/CENPE/KIF18A/GEN1/KIF22/BUB3/AURKA/RCC1/NCAPG/SMC3/NSL1/KPNB1/BUB1B/KIF11/BCCIP/NCAPG2/MAD2L1/NDC1/SPDL1/KIF2C/DSN1/NCAPH/CDC25C/KIF14/CCNB1/KNTC1/CHEK2/CDCA5/PSMD13/BUB1/ZWINT/KIF4A/PLK1/CDCA8/RAD51/BORA/CDT1/KIFC1/AURKB/RAD54B/MASTL/MZT1/RAN/KIF23/KIF4B/CDC23/ASPM/AAAS/RAD54L	65
BP	GO:0048285	organelle fission	67/443	476/18866	5.66567e-33	3.9688e-30	3.0371e-30	HNRNPU/FIGNL1/NDC80/CHEK1/KIF20B/EME1/TTK/NUF2/FANCA/CENPK/NEK2/CDK1/KNSTRN/UBE2C/FBXO5/NUP62/TPX2/CENPE/KIF18A/GEN1/KIF22/BUB3/AURKA/RCC1/NCAPG/SMC3/NSL1/KPNB1/BUB1B/KIF11/BCCIP/NCAPG2/MAD2L1/NDC1/SPDL1/KIF2C/DSN1/NCAPH/CDC25C/KIF14/CCNB1/KNTC1/CHEK2/CDCA5/PSMD13/BUB1/ZWINT/KIF4A/PLK1/MTFR2/CDCA8/RAD51/BORA/CDT1/KIFC1/AURKB/RAD54B/MASTL/MZT1/RAN/KIF23/KIF4B/CDC23/TMEM135/ASPM/AAAS/RAD54L	67
BP	GO:0007059	chromosome segregation	57/443	334/18866	1.28242e-32	7.18666e-30	5.49954e-30	HNRNPU/MIS18A/SPC25/NDC80/EME1/TTK/NUF2/CENPK/NEK2/HJURP/KNSTRN/UBE2C/FBXO5/NUP62/CENPE/SFPQ/KIF18A/NUP43/GEN1/KIF22/BUB3/RCC1/NCAPG/SMC3/NSL1/KPNB1/BUB1B/SKA3/NCAPG2/MAD2L1/NDC1/SPDL1/KIF2C/DSN1/NUP37/NCAPH/FEN1/KIF14/CCNB1/CDCA2/RMI2/CENPH/CDCA5/BUB1/ZWINT/KIF4A/PLK1/CDCA8/CDT1/KIFC1/AURKB/SKA1/BRCA1/RAN/KIF23/KIF4B/CDC23	57
BP	GO:0006261	DNA-dependent DNA replication	41/443	151/18866	3.89891e-32	1.82079e-29	1.39335e-29	DNA2/EME1/ORC6/RPA3/PRIM1/FBXO5/MCM10/GEN1/MCM6/POLD1/GMNN/CDC7/GINS1/POLE2/MMS22L/MGME1/LIG1/ORC1/FEN1/PRIM2/RECQL4/CHEK2/CHTF18/PCNA/TIPIN/CDK2/RFWD3/MCM4/TONSL/RAD51/THOC1/CDT1/RFC5/RFC3/ORC3/RPA2/DONSON/ZGRF1/GINS4/ZNF830/DBF4	41
BP	GO:0022613	ribonucleoprotein complex biogenesis	65/443	482/18866	7.22074e-31	2.89036e-28	2.21183e-28	SRSF1/RBMX/XPO1/DDX1/DKC1/DDX56/LYAR/WDR75/EIF3B/DDX10/GEMIN6/UTP6/CEBPZ/MRTO4/NOL10/WDR43/MPHOSPH10/RUVBL2/GAR1/SRSF10/NOP56/EXOSC9/PTGES3/GCFC2/BRIX1/RRP15/XRCC5/SNRPG/RPP30/MRPL1/PRPF31/MALSU1/ESF1/NOP58/SNRPE/DHX9/RSL1D1/DDX27/NPM1/COIL/GTPBP4/RRP1B/UTP14A/EXOSC2/NUP88/NLE1/FDXACB1/NOL11/ZNHIT6/PA2G4/CLNS1A/TFB2M/SNRPB/EMG1/FBL/RAN/EIF3J/NUDT21/NVL/PELP1/TGS1/PIH1D1/PAK1IP1/WDR74/LSM6	65
BP	GO:0000819	sister chromatid segregation	44/443	196/18866	1.41534e-30	4.95721e-28	3.79347e-28	HNRNPU/NDC80/TTK/NUF2/CENPK/NEK2/KNSTRN/UBE2C/FBXO5/NUP62/CENPE/SFPQ/KIF18A/GEN1/KIF22/BUB3/NCAPG/SMC3/NSL1/KPNB1/BUB1B/NCAPG2/MAD2L1/SPDL1/KIF2C/DSN1/NCAPH/FEN1/KIF14/CCNB1/RMI2/CDCA5/BUB1/ZWINT/KIF4A/PLK1/CDCA8/CDT1/KIFC1/AURKB/RAN/KIF23/KIF4B/CDC23	44
BP	GO:0000070	mitotic sister chromatid segregation	40/443	161/18866	1.01676e-29	3.16551e-27	2.42239e-27	HNRNPU/NDC80/TTK/NUF2/CENPK/NEK2/KNSTRN/UBE2C/FBXO5/NUP62/CENPE/KIF18A/GEN1/KIF22/BUB3/NCAPG/NSL1/KPNB1/BUB1B/NCAPG2/MAD2L1/SPDL1/KIF2C/DSN1/NCAPH/KIF14/CCNB1/CDCA5/BUB1/ZWINT/KIF4A/PLK1/CDCA8/CDT1/KIFC1/AURKB/RAN/KIF23/KIF4B/CDC23	40
BP	GO:0098813	nuclear chromosome segregation	46/443	272/18866	2.91602e-26	8.17068e-24	6.25256e-24	HNRNPU/NDC80/EME1/TTK/NUF2/CENPK/NEK2/KNSTRN/UBE2C/FBXO5/NUP62/CENPE/SFPQ/KIF18A/GEN1/KIF22/BUB3/NCAPG/SMC3/NSL1/KPNB1/BUB1B/NCAPG2/MAD2L1/NDC1/SPDL1/KIF2C/DSN1/NCAPH/FEN1/KIF14/CCNB1/RMI2/CDCA5/BUB1/ZWINT/KIF4A/PLK1/CDCA8/CDT1/KIFC1/AURKB/RAN/KIF23/KIF4B/CDC23	46
BP	GO:0044786	cell cycle DNA replication	26/443	65/18866	9.06715e-26	2.30965e-23	1.76744e-23	DNA2/RPA3/PRIM1/FBXO5/MCM6/POLD1/GMNN/CDC7/GINS1/POLE2/LIG1/FEN1/PRIM2/CHEK2/PCNA/TIPIN/MCM4/RAD51/CDT1/RFC5/RFC3/ORC3/RPA2/DONSON/ZNF830/DBF4	26
BP	GO:0033260	nuclear DNA replication	25/443	60/18866	2.30543e-25	5.38318e-23	4.11944e-23	DNA2/RPA3/PRIM1/MCM6/POLD1/GMNN/CDC7/GINS1/POLE2/LIG1/FEN1/PRIM2/CHEK2/PCNA/TIPIN/MCM4/RAD51/CDT1/RFC5/RFC3/ORC3/RPA2/DONSON/ZNF830/DBF4	25
BP	GO:1901987	regulation of cell cycle phase transition	58/443	486/18866	8.76758e-25	1.88975e-22	1.44612e-22	NDC80/CHEK1/TTK/NEK2/CDK1/UBE2C/HMMR/FBXO5/CDC25A/TPX2/CENPE/CEP152/PRMT1/GEN1/BUB3/AURKA/TFAP4/CDC7/BUB1B/MAD2L1/SPDL1/PLK4/ORC1/CDC25C/KIF14/CCNB1/CLSPN/NAE1/KNTC1/CHEK2/CDCA5/PSMD13/BUB1/PCNA/CDK2/CEP57/PLK1/RFWD3/HAUS8/DTL/NPM1/RBL1/PSMD14/CDT1/AURKB/PSMA1/CEP78/PSMD1/EZH2/BRCA1/RPA2/DONSON/CDC23/ZNF830/CEP131/PSMA2/DBF4/TRIAP1	58
BP	GO:1901990	regulation of mitotic cell cycle phase transition	55/443	448/18866	3.93488e-24	7.87538e-22	6.02658e-22	NDC80/TTK/NEK2/CDK1/UBE2C/HMMR/FBXO5/CDC25A/TPX2/CENPE/CEP152/PRMT1/GEN1/BUB3/AURKA/TFAP4/CDC7/BUB1B/MAD2L1/SPDL1/PLK4/ORC1/CDC25C/KIF14/CCNB1/CLSPN/NAE1/KNTC1/CHEK2/CDCA5/PSMD13/BUB1/PCNA/CDK2/CEP57/PLK1/RFWD3/HAUS8/DTL/RBL1/PSMD14/CDT1/AURKB/PSMA1/CEP78/PSMD1/EZH2/BRCA1/RPA2/DONSON/CDC23/ZNF830/CEP131/PSMA2/TRIAP1	55
BP	GO:0006403	RNA localization	41/443	236/18866	5.74759e-24	1.07365e-21	8.21603e-22	HNRNPA2B1/SRSF1/HNRNPU/SSB/PNPT1/SRSF3/XPO1/CPSF3/SRSF7/DKC1/MAGOHB/NUP62/SFPQ/NUP43/SRSF2/RUVBL2/CCT8/NDC1/CETN3/CCT4/NUP37/KHDRBS1/NOP58/DHX9/HNRNPA1/NPM1/NUP160/EXOSC2/NUP88/THOC1/ZNHIT6/RAE1/SLBP/NUP35/RBM27/FBL/MAGOH/RAN/LRPPRC/PIH1D1/AAAS	41
BP	GO:0042254	ribosome biogenesis	46/443	310/18866	9.03799e-24	1.58278e-21	1.21121e-21	XPO1/DKC1/DDX56/LYAR/WDR75/DDX10/UTP6/CEBPZ/MRTO4/NOL10/WDR43/MPHOSPH10/GAR1/NOP56/EXOSC9/BRIX1/RRP15/XRCC5/RPP30/MRPL1/MALSU1/ESF1/NOP58/RSL1D1/DDX27/NPM1/GTPBP4/RRP1B/UTP14A/EXOSC2/NUP88/NLE1/FDXACB1/NOL11/ZNHIT6/PA2G4/TFB2M/EMG1/FBL/RAN/NVL/PELP1/PIH1D1/PAK1IP1/WDR74/LSM6	46
BP	GO:0010948	negative regulation of cell cycle process	48/443	359/18866	9.32532e-23	1.53703e-20	1.1762e-20	CBX3/NDC80/CHEK1/E2F6/TTK/NEK2/CDK1/FBXO5/PRMT1/GEN1/BUB3/AURKA/TFAP4/PCGF6/CDC7/BUB1B/MAD2L1/SPDL1/ORC1/RRM2/CDC25C/CCNB1/CLSPN/NAE1/EED/CHEK2/PSMD13/BUB1/PCNA/CDK2/PLK1/RFWD3/DTL/NPM1/RAD51/RBL1/PSMD14/CDT1/AURKB/PSMA1/PSMD1/EZH2/BRCA1/RPA2/DONSON/ZNF830/PSMA2/TRIAP1	48
BP	GO:0008380	RNA splicing	55/443	487/18866	2.29461e-22	3.57194e-20	2.7334e-20	HNRNPA2B1/SRSF1/RBMX/NCL/LSM5/HNRNPU/HNRNPH3/SRSF3/CPSF3/DDX1/FUS/CCAR1/SRSF7/RP9/MAGOHB/SNRPA/HNRNPM/FAM98B/PPIH/GEMIN6/SFPQ/SRSF2/MPHOSPH10/HNRNPC/HNRNPR/SRSF10/HNRNPK/TCERG1/GCFC2/HNRNPD/KHDRBS1/SNRPG/TARDBP/PRPF31/SMNDC1/HNRNPUL1/DDX46/SNRPE/DHX9/HNRNPA1/PRPF40A/COIL/TRA2A/RRP1B/THOC1/CLNS1A/HNRNPL/SNRPB/MAGOH/NUDT21/ZNF830/TGS1/SNRNP70/PSPC1/LSM6	55
BP	GO:0000075	cell cycle checkpoint	38/443	219/18866	2.88847e-22	4.25974e-20	3.25973e-20	DNA2/MSH2/NDC80/CHEK1/EME1/TTK/CDK1/PRMT1/GEN1/BUB3/AURKA/BUB1B/MAD2L1/SPDL1/ORC1/CDC25C/CCNB1/CLSPN/NAE1/KNTC1/CHEK2/BUB1/PCNA/TIPIN/ZWINT/CDK2/PLK1/RFWD3/DTL/THOC1/CDT1/AURKB/BRCA1/RPA2/DONSON/ZNF830/USP28/TRIAP1	38
BP	GO:0007052	mitotic spindle organization	29/443	118/18866	1.0689e-21	1.49753e-19	1.14597e-19	HNRNPU/SPC25/NDC80/TTK/NUF2/NEK2/NUP62/TPX2/CENPE/AURKA/RCC1/SMC3/KPNB1/KIF11/BCCIP/CCNB1/CENPH/CHEK2/KIF4A/PLK1/BORA/KIFC1/RAE1/AURKB/MZT1/RAN/KIF23/KIF4B/AAAS	29
BP	GO:0007093	mitotic cell cycle checkpoint	33/443	166/18866	2.10105e-21	2.8034e-19	2.14528e-19	MSH2/NDC80/EME1/TTK/CDK1/PRMT1/GEN1/BUB3/AURKA/BUB1B/MAD2L1/SPDL1/ORC1/CDC25C/CCNB1/CLSPN/NAE1/KNTC1/CHEK2/BUB1/PCNA/TIPIN/ZWINT/CDK2/PLK1/RFWD3/CDT1/AURKB/BRCA1/RPA2/DONSON/ZNF830/TRIAP1	33
BP	GO:1902850	microtubule cytoskeleton organization involved in mitosis	31/443	144/18866	2.91312e-21	3.71026e-19	2.83925e-19	HNRNPU/SPC25/NDC80/TTK/NUF2/NEK2/NUP62/TPX2/CENPE/AURKA/RCC1/SMC3/KPNB1/KIF11/BCCIP/MAD2L1/SPDL1/CCNB1/CENPH/CHEK2/KIF4A/PLK1/BORA/KIFC1/RAE1/AURKB/MZT1/RAN/KIF23/KIF4B/AAAS	31
BP	GO:0000375	RNA splicing, via transesterification reactions	48/443	393/18866	4.72019e-21	5.75042e-19	4.40047e-19	HNRNPA2B1/SRSF1/RBMX/NCL/LSM5/HNRNPU/HNRNPH3/SRSF3/CPSF3/DDX1/FUS/CCAR1/SRSF7/MAGOHB/SNRPA/HNRNPM/PPIH/GEMIN6/SFPQ/SRSF2/MPHOSPH10/HNRNPC/HNRNPR/SRSF10/HNRNPK/GCFC2/HNRNPD/KHDRBS1/SNRPG/PRPF31/SMNDC1/HNRNPUL1/DDX46/SNRPE/DHX9/HNRNPA1/PRPF40A/COIL/TRA2A/CLNS1A/HNRNPL/SNRPB/MAGOH/NUDT21/TGS1/SNRNP70/PSPC1/LSM6	48
BP	GO:0044839	cell cycle G2/M phase transition	40/443	273/18866	1.38878e-20	1.6214e-18	1.24076e-18	CHEK1/NEK2/CDK1/HMMR/FBXO5/CDC25A/TPX2/CEP152/AURKA/CDC7/PLK4/ORC1/KHDRBS1/CDC25C/KIF14/CCNB1/CLSPN/NAE1/CHEK2/PSMD13/CDK2/CCNA2/CEP57/PLK1/SKP2/HAUS8/DTL/NPM1/PSMD14/BORA/AURKB/PSMA1/CEP78/PSMD1/MASTL/BRCA1/DONSON/ZNF830/CEP131/PSMA2	40
BP	GO:0000377	RNA splicing, via transesterification reactions with bulged adenosine as nucleophile	47/443	390/18866	2.18153e-20	2.35102e-18	1.7991e-18	HNRNPA2B1/SRSF1/RBMX/NCL/LSM5/HNRNPU/HNRNPH3/SRSF3/CPSF3/DDX1/FUS/CCAR1/SRSF7/MAGOHB/SNRPA/HNRNPM/PPIH/GEMIN6/SFPQ/SRSF2/HNRNPC/HNRNPR/SRSF10/HNRNPK/GCFC2/HNRNPD/KHDRBS1/SNRPG/PRPF31/SMNDC1/HNRNPUL1/DDX46/SNRPE/DHX9/HNRNPA1/PRPF40A/COIL/TRA2A/CLNS1A/HNRNPL/SNRPB/MAGOH/NUDT21/TGS1/SNRNP70/PSPC1/LSM6	47
BP	GO:0000398	mRNA splicing, via spliceosome	47/443	390/18866	2.18153e-20	2.35102e-18	1.7991e-18	HNRNPA2B1/SRSF1/RBMX/NCL/LSM5/HNRNPU/HNRNPH3/SRSF3/CPSF3/DDX1/FUS/CCAR1/SRSF7/MAGOHB/SNRPA/HNRNPM/PPIH/GEMIN6/SFPQ/SRSF2/HNRNPC/HNRNPR/SRSF10/HNRNPK/GCFC2/HNRNPD/KHDRBS1/SNRPG/PRPF31/SMNDC1/HNRNPUL1/DDX46/SNRPE/DHX9/HNRNPA1/PRPF40A/COIL/TRA2A/CLNS1A/HNRNPL/SNRPB/MAGOH/NUDT21/TGS1/SNRNP70/PSPC1/LSM6	47
BP	GO:0045930	negative regulation of mitotic cell cycle	44/443	341/18866	2.58955e-20	2.68737e-18	2.05649e-18	MSH2/PNPT1/NDC80/CHEK1/EME1/TTK/CDK1/FBXO5/PRMT1/GEN1/BUB3/AURKA/BUB1B/MAD2L1/SPDL1/ORC1/CDC25C/CCNB1/CLSPN/NAE1/KNTC1/CHEK2/PSMD13/BUB1/PCNA/TIPIN/ZWINT/CDK2/PLK1/RFWD3/RBL1/PSMD14/NLE1/CDT1/AURKB/PSMA1/PSMD1/EZH2/BRCA1/RPA2/DONSON/ZNF830/PSMA2/TRIAP1	44
BP	GO:0007051	spindle organization	33/443	183/18866	5.1087e-20	5.11235e-18	3.91219e-18	HNRNPU/SPC25/NDC80/TTK/NUF2/NEK2/KNSTRN/FBXO5/NUP62/TPX2/CENPE/AURKA/RCC1/SMC3/KPNB1/KIF11/BCCIP/CCNB1/CENPH/CHEK2/KIF4A/PLK1/HAUS8/BORA/KIFC1/RAE1/AURKB/MZT1/RAN/KIF23/KIF4B/ASPM/AAAS	33
BP	GO:0000086	G2/M transition of mitotic cell cycle	38/443	254/18866	6.28785e-20	6.07536e-18	4.64913e-18	NEK2/CDK1/HMMR/FBXO5/CDC25A/TPX2/CEP152/AURKA/CDC7/PLK4/ORC1/KHDRBS1/CDC25C/KIF14/CCNB1/CLSPN/NAE1/CHEK2/PSMD13/CDK2/CCNA2/CEP57/PLK1/SKP2/HAUS8/DTL/PSMD14/BORA/AURKB/PSMA1/CEP78/PSMD1/MASTL/BRCA1/DONSON/ZNF830/CEP131/PSMA2	38
BP	GO:0006364	rRNA processing	36/443	227/18866	8.5039e-20	7.94264e-18	6.07805e-18	DKC1/DDX56/LYAR/WDR75/DDX10/UTP6/MRTO4/NOL10/WDR43/MPHOSPH10/GAR1/NOP56/EXOSC9/RRP15/RPP30/MRPL1/ESF1/NOP58/RSL1D1/DDX27/GTPBP4/RRP1B/UTP14A/EXOSC2/FDXACB1/NOL11/ZNHIT6/PA2G4/TFB2M/EMG1/FBL/NVL/PELP1/PIH1D1/WDR74/LSM6	36
BP	GO:0000082	G1/S transition of mitotic cell cycle	40/443	287/18866	8.88825e-20	8.03383e-18	6.14783e-18	NASP/E2F6/ORC6/CDK1/RPA3/PRIM1/FBXO5/CDC25A/MCM10/PRMT1/MCM6/AURKA/RCC1/MCM8/GMNN/CDC7/POLE2/ORC1/KHDRBS1/RRM2/CDC25C/PRIM2/KIF14/CCNB1/CHEK2/PCNA/CDK2/RFWD3/SKP2/MCM4/RBL1/CDT1/E2F3/DHFR/EZH2/ORC3/RPA2/DBF4/TRIAP1/TYMS	40
BP	GO:0044843	cell cycle G1/S phase transition	41/443	310/18866	2.15788e-19	1.8895e-17	1.44592e-17	NASP/E2F6/ORC6/CDK1/RPA3/PRIM1/FBXO5/CDC25A/MCM10/PRMT1/MCM6/AURKA/RCC1/MCM8/GMNN/CDC7/POLE2/ORC1/KHDRBS1/RRM2/CDC25C/PRIM2/KIF14/CCNB1/CHEK2/PCNA/CDK2/CCNA2/RFWD3/SKP2/MCM4/RBL1/CDT1/E2F3/DHFR/EZH2/ORC3/RPA2/DBF4/TRIAP1/TYMS	41
BP	GO:0034660	ncRNA metabolic process	51/443	493/18866	4.12219e-19	3.50011e-17	2.67844e-17	HNRNPA2B1/NARS2/SSB/PNPT1/DDX1/DKC1/DDX56/LYAR/FAM98B/WDR75/DDX10/UTP6/MRTO4/NOL10/WDR43/MPHOSPH10/DARS2/GAR1/NOP56/EXOSC9/TPRKB/FARSB/RRP15/RPP30/MRPL1/TRMT6/AIMP1/ESF1/WDR4/NOP58/RSL1D1/DDX27/GTPBP4/RRP1B/UTP14A/EXOSC2/FDXACB1/NOL11/ZNHIT6/PA2G4/TFB2M/EMG1/IARS2/TRUB1/FBL/RAN/NVL/PELP1/PIH1D1/WDR74/LSM6	51
BP	GO:0016072	rRNA metabolic process	36/443	238/18866	4.25947e-19	3.5103e-17	2.68623e-17	DKC1/DDX56/LYAR/WDR75/DDX10/UTP6/MRTO4/NOL10/WDR43/MPHOSPH10/GAR1/NOP56/EXOSC9/RRP15/RPP30/MRPL1/ESF1/NOP58/RSL1D1/DDX27/GTPBP4/RRP1B/UTP14A/EXOSC2/FDXACB1/NOL11/ZNHIT6/PA2G4/TFB2M/EMG1/FBL/NVL/PELP1/PIH1D1/WDR74/LSM6	36
BP	GO:1901988	negative regulation of cell cycle phase transition	38/443	270/18866	5.45912e-19	4.37042e-17	3.34443e-17	NDC80/CHEK1/TTK/CDK1/FBXO5/PRMT1/GEN1/BUB3/AURKA/BUB1B/MAD2L1/SPDL1/ORC1/CDC25C/CCNB1/CLSPN/NAE1/CHEK2/PSMD13/BUB1/PCNA/CDK2/PLK1/RFWD3/DTL/RBL1/PSMD14/CDT1/AURKB/PSMA1/PSMD1/EZH2/BRCA1/RPA2/DONSON/ZNF830/PSMA2/TRIAP1	38
BP	GO:1902749	regulation of cell cycle G2/M phase transition	34/443	217/18866	1.37201e-18	1.06788e-16	8.17186e-17	CHEK1/NEK2/CDK1/HMMR/FBXO5/CDC25A/TPX2/CEP152/AURKA/CDC7/PLK4/ORC1/CDC25C/KIF14/CCNB1/CLSPN/NAE1/PSMD13/CDK2/CEP57/PLK1/HAUS8/DTL/NPM1/PSMD14/AURKB/PSMA1/CEP78/PSMD1/BRCA1/DONSON/ZNF830/CEP131/PSMA2	34
BP	GO:1901991	negative regulation of mitotic cell cycle phase transition	36/443	251/18866	2.54684e-18	1.92872e-16	1.47594e-16	NDC80/TTK/CDK1/FBXO5/PRMT1/GEN1/BUB3/AURKA/BUB1B/MAD2L1/SPDL1/ORC1/CDC25C/CCNB1/CLSPN/NAE1/CHEK2/PSMD13/BUB1/PCNA/CDK2/PLK1/RFWD3/RBL1/PSMD14/CDT1/AURKB/PSMA1/PSMD1/EZH2/BRCA1/RPA2/DONSON/ZNF830/PSMA2/TRIAP1	36
BP	GO:0010389	regulation of G2/M transition of mitotic cell cycle	32/443	200/18866	7.69448e-18	5.38998e-16	4.12465e-16	NEK2/CDK1/HMMR/FBXO5/CDC25A/TPX2/CEP152/AURKA/CDC7/PLK4/ORC1/CDC25C/KIF14/CCNB1/CLSPN/NAE1/PSMD13/CDK2/CEP57/PLK1/HAUS8/DTL/PSMD14/AURKB/PSMA1/CEP78/PSMD1/BRCA1/DONSON/ZNF830/CEP131/PSMA2	32
BP	GO:0050657	nucleic acid transport	32/443	200/18866	7.69448e-18	5.38998e-16	4.12465e-16	HNRNPA2B1/SRSF1/HNRNPU/SSB/PNPT1/SRSF3/XPO1/CPSF3/SRSF7/MAGOHB/NUP62/SFPQ/NUP43/SRSF2/NDC1/CETN3/NUP37/KHDRBS1/DHX9/HNRNPA1/NPM1/NUP160/NUP88/THOC1/RAE1/SLBP/NUP35/RBM27/MAGOH/RAN/LRPPRC/AAAS	32
BP	GO:0050658	RNA transport	32/443	200/18866	7.69448e-18	5.38998e-16	4.12465e-16	HNRNPA2B1/SRSF1/HNRNPU/SSB/PNPT1/SRSF3/XPO1/CPSF3/SRSF7/MAGOHB/NUP62/SFPQ/NUP43/SRSF2/NDC1/CETN3/NUP37/KHDRBS1/DHX9/HNRNPA1/NPM1/NUP160/NUP88/THOC1/RAE1/SLBP/NUP35/RBM27/MAGOH/RAN/LRPPRC/AAAS	32
BP	GO:0007080	mitotic metaphase plate congression	18/443	47/18866	8.17366e-18	5.586e-16	4.27465e-16	HNRNPU/NDC80/NUF2/NUP62/CENPE/KIF18A/KIF22/KPNB1/SPDL1/KIF2C/KIF14/CCNB1/CDCA5/CDCA8/CDT1/KIFC1/AURKB/CDC23	18
BP	GO:1903311	regulation of mRNA metabolic process	41/443	344/18866	9.92036e-18	6.6183e-16	5.06461e-16	HNRNPA2B1/SRSF1/RBMX/NCL/HNRNPU/PNPT1/SRSF3/XPO1/FUS/SRSF7/SNRPA/HNRNPM/SRSF2/HNRNPC/HNRNPR/SRSF10/HNRNPK/EXOSC9/HNRNPD/KHDRBS1/CCNB1/TARDBP/TBRG4/PSMD13/BARD1/DHX9/HNRNPA1/NPM1/TRA2A/EXOSC2/PSMD14/HNRNPL/PSMA1/PSMD1/MAGOH/NUDT21/ANP32A/PSMA2/CTR9/SNRNP70/DHX34	41
BP	GO:0051236	establishment of RNA localization	32/443	203/18866	1.21028e-17	7.88652e-16	6.0351e-16	HNRNPA2B1/SRSF1/HNRNPU/SSB/PNPT1/SRSF3/XPO1/CPSF3/SRSF7/MAGOHB/NUP62/SFPQ/NUP43/SRSF2/NDC1/CETN3/NUP37/KHDRBS1/DHX9/HNRNPA1/NPM1/NUP160/NUP88/THOC1/RAE1/SLBP/NUP35/RBM27/MAGOH/RAN/LRPPRC/AAAS	32
BP	GO:0034470	ncRNA processing	44/443	400/18866	1.29417e-17	8.24153e-16	6.30678e-16	HNRNPA2B1/SSB/DDX1/DKC1/DDX56/LYAR/FAM98B/WDR75/DDX10/UTP6/MRTO4/NOL10/WDR43/MPHOSPH10/GAR1/NOP56/EXOSC9/TPRKB/RRP15/RPP30/MRPL1/TRMT6/ESF1/WDR4/NOP58/RSL1D1/DDX27/GTPBP4/RRP1B/UTP14A/EXOSC2/FDXACB1/NOL11/ZNHIT6/PA2G4/TFB2M/EMG1/TRUB1/FBL/NVL/PELP1/PIH1D1/WDR74/LSM6	44
BP	GO:0051983	regulation of chromosome segregation	24/443	107/18866	3.54638e-17	2.20822e-15	1.68982e-15	HNRNPU/NDC80/TTK/NEK2/KNSTRN/UBE2C/FBXO5/CENPE/SFPQ/GEN1/BUB3/BUB1B/MAD2L1/SPDL1/KIF2C/FEN1/CCNB1/RMI2/CDCA5/BUB1/PLK1/CDT1/AURKB/CDC23	24
BP	GO:0006405	RNA export from nucleus	27/443	144/18866	4.78591e-17	2.91524e-15	2.23087e-15	HNRNPA2B1/SRSF1/SSB/SRSF3/XPO1/CPSF3/SRSF7/MAGOHB/NUP62/NUP43/SRSF2/NDC1/NUP37/KHDRBS1/DHX9/HNRNPA1/NPM1/NUP160/NUP88/THOC1/RAE1/SLBP/NUP35/RBM27/MAGOH/RAN/AAAS	27
BP	GO:0006302	double-strand break repair	35/443	262/18866	7.52942e-17	4.48882e-15	3.43504e-15	DNA2/MSH2/FIGNL1/CHEK1/XRCC2/EME1/DDX1/FUS/RPA3/SFPQ/GEN1/MCM6/PARPBP/MCM8/CDC7/MMS22L/XRCC5/FEN1/RMI2/RECQL4/CHEK2/CDCA5/BARD1/RFWD3/MCM4/TONSL/RAD51/PSMD14/FANCB/RAD54B/BRCA1/RPA2/GINS4/DEK/RAD54L	35
BP	GO:0000723	telomere maintenance	28/443	161/18866	9.78205e-17	5.71027e-15	4.36975e-15	HNRNPA2B1/DNA2/HNRNPU/NEK2/DKC1/RPA3/PRIM1/HNRNPC/POLD1/GAR1/POLE2/CCT8/PTGES3/PIF1/CCT4/HNRNPD/XRCC5/FEN1/PRIM2/RECQL4/PCNA/HNRNPA1/RAD51/AURKB/RFC5/EXO1/RFC3/RPA2	28
BP	GO:0006310	DNA recombination	37/443	299/18866	1.22084e-16	6.98124e-15	5.34234e-15	MSH2/FIGNL1/HMGB2/CHEK1/XRCC2/EME1/FUS/RPA3/SFPQ/GEN1/MCM6/RUVBL2/HMGB1/PARPBP/MCM8/CDC7/UCHL5/MMS22L/PIF1/XRCC5/FEN1/HSPD1/RMI2/RECQL4/RFWD3/MCM4/TONSL/RAD51/PSMD14/THOC1/FANCB/RAD54B/EXO1/BRCA1/RPA2/GINS4/RAD54L	37
BP	GO:0007088	regulation of mitotic nuclear division	28/443	163/18866	1.36761e-16	7.66409e-15	5.86489e-15	HNRNPU/NDC80/CHEK1/KIF20B/TTK/NEK2/UBE2C/FBXO5/NUP62/CENPE/GEN1/BUB3/AURKA/RCC1/BUB1B/KIF11/MAD2L1/SPDL1/CDC25C/CCNB1/KNTC1/CDCA5/BUB1/PLK1/BORA/CDT1/AURKB/CDC23	28
BP	GO:0000724	double-strand break repair via homologous recombination	26/443	138/18866	1.62632e-16	8.88021e-15	6.79552e-15	FIGNL1/CHEK1/XRCC2/FUS/RPA3/SFPQ/GEN1/MCM6/PARPBP/MCM8/CDC7/MMS22L/FEN1/RMI2/RECQL4/RFWD3/MCM4/TONSL/RAD51/PSMD14/FANCB/RAD54B/BRCA1/RPA2/GINS4/RAD54L	26
BP	GO:0006913	nucleocytoplasmic transport	40/443	354/18866	1.64801e-16	8.88021e-15	6.79552e-15	HNRNPA2B1/SRSF1/SSB/SRSF3/XPO1/CPSF3/CDK1/SRSF7/MAGOHB/NUP62/GEMIN6/NUP43/SRSF2/KPNB1/NDC1/NUP37/KHDRBS1/SNRPG/TARDBP/CSE1L/SNRPE/BARD1/DHX9/HNRNPA1/TMCO6/NPM1/AKAP13/NUP160/NUP88/THOC1/RAE1/SLBP/NUP35/SNRPB/E2F3/RBM27/MAGOH/RAN/ANP32A/AAAS	40
BP	GO:0033044	regulation of chromosome organization	40/443	356/18866	2.0049e-16	1.05995e-14	8.11117e-15	HNRNPA2B1/HNRNPU/NDC80/CHEK1/TTK/NEK2/DKC1/UBE2C/FBXO5/CENPE/SFPQ/GEN1/BUB3/RUVBL2/HNRNPC/BUB1B/CCT8/MAD2L1/PIF1/SPDL1/CCT4/HNRNPD/XRCC5/FEN1/CCNB1/RMI2/EED/PRMT6/CDCA5/BUB1/HNRNPA1/PLK1/CDT1/AURKB/SSRP1/BRCA1/PPHLN1/CDC23/CTR9/PIH1D1	40
BP	GO:0051169	nuclear transport	40/443	357/18866	2.21017e-16	1.14683e-14	8.77607e-15	HNRNPA2B1/SRSF1/SSB/SRSF3/XPO1/CPSF3/CDK1/SRSF7/MAGOHB/NUP62/GEMIN6/NUP43/SRSF2/KPNB1/NDC1/NUP37/KHDRBS1/SNRPG/TARDBP/CSE1L/SNRPE/BARD1/DHX9/HNRNPA1/TMCO6/NPM1/AKAP13/NUP160/NUP88/THOC1/RAE1/SLBP/NUP35/SNRPB/E2F3/RBM27/MAGOH/RAN/ANP32A/AAAS	40
BP	GO:0000725	recombinational repair	26/443	140/18866	2.35295e-16	1.19872e-14	9.17313e-15	FIGNL1/CHEK1/XRCC2/FUS/RPA3/SFPQ/GEN1/MCM6/PARPBP/MCM8/CDC7/MMS22L/FEN1/RMI2/RECQL4/RFWD3/MCM4/TONSL/RAD51/PSMD14/FANCB/RAD54B/BRCA1/RPA2/GINS4/RAD54L	26
BP	GO:0033045	regulation of sister chromatid segregation	21/443	84/18866	3.19497e-16	1.59863e-14	1.22334e-14	HNRNPU/NDC80/TTK/UBE2C/FBXO5/CENPE/SFPQ/GEN1/BUB3/BUB1B/MAD2L1/SPDL1/FEN1/CCNB1/RMI2/CDCA5/BUB1/PLK1/CDT1/AURKB/CDC23	21
BP	GO:0032200	telomere organization	28/443	174/18866	7.91836e-16	3.8925e-14	2.97871e-14	HNRNPA2B1/DNA2/HNRNPU/NEK2/DKC1/RPA3/PRIM1/HNRNPC/POLD1/GAR1/POLE2/CCT8/PTGES3/PIF1/CCT4/HNRNPD/XRCC5/FEN1/PRIM2/RECQL4/PCNA/HNRNPA1/RAD51/AURKB/RFC5/EXO1/RFC3/RPA2	28
BP	GO:0031570	DNA integrity checkpoint	27/443	161/18866	9.03444e-16	4.35103e-14	3.32959e-14	DNA2/MSH2/CHEK1/EME1/CDK1/PRMT1/AURKA/ORC1/CDC25C/CCNB1/CLSPN/NAE1/CHEK2/PCNA/TIPIN/CDK2/PLK1/RFWD3/DTL/THOC1/CDT1/BRCA1/RPA2/DONSON/ZNF830/USP28/TRIAP1	27
BP	GO:0051168	nuclear export	30/443	204/18866	9.1617e-16	4.35103e-14	3.32959e-14	HNRNPA2B1/SRSF1/SSB/SRSF3/XPO1/CPSF3/SRSF7/MAGOHB/NUP62/NUP43/SRSF2/NDC1/NUP37/KHDRBS1/CSE1L/BARD1/DHX9/HNRNPA1/NPM1/AKAP13/NUP160/NUP88/THOC1/RAE1/SLBP/NUP35/RBM27/MAGOH/RAN/AAAS	30
BP	GO:0071103	DNA conformation change	39/443	355/18866	1.03798e-15	4.84735e-14	3.7094e-14	HNRNPA2B1/DNA2/MIS18A/NASP/HMGB2/DDX1/CENPK/CDK1/HJURP/CENPL/HELLS/MCM6/RUVBL2/ITGB3BP/NCAPG/HMGB1/MCM8/NCAPG2/PIF1/XRCC5/NCAPH/ASF1B/CCNB1/GTF2H3/CENPH/RECQL4/CHTF18/CDCA5/CHAF1B/DHX9/NPM1/MCM4/RAD51/RAD54B/RFC5/RFC3/PPHLN1/GINS4/RAD54L	39
BP	GO:0006275	regulation of DNA replication	23/443	112/18866	1.2895e-15	5.92324e-14	4.53272e-14	DNA2/CDK1/CACYBP/FBXO5/SMC3/GMNN/CDC7/CHEK2/CHTF18/PCNA/TIPIN/CDK2/DHX9/CCNA2/GTPBP4/CDT1/RFC5/MCIDAS/RFC3/ORC3/DONSON/ZNF830/DBF4	23
BP	GO:0051310	metaphase plate congression	18/443	61/18866	1.73546e-15	7.84316e-14	6.00192e-14	HNRNPU/NDC80/NUF2/NUP62/CENPE/KIF18A/KIF22/KPNB1/SPDL1/KIF2C/KIF14/CCNB1/CDCA5/CDCA8/CDT1/KIFC1/AURKB/CDC23	18
BP	GO:0071897	DNA biosynthetic process	29/443	196/18866	2.37104e-15	1.05455e-13	8.06985e-14	HNRNPA2B1/HNRNPU/NEK2/DKC1/RPA3/HNRNPC/POLD1/GAR1/POLE2/CCT8/LIN9/PTGES3/PIF1/LIG1/CCT4/HNRNPD/XRCC5/CHTF18/PCNA/HNRNPA1/DTL/AURKB/DNAJC2/RFC5/PPIA/RFC3/RPA2/NVL/TYMS	29
BP	GO:0071166	ribonucleoprotein complex localization	24/443	131/18866	4.69142e-15	2.05396e-13	1.57178e-13	HNRNPA2B1/SRSF1/SSB/SRSF3/XPO1/CPSF3/SRSF7/MAGOHB/NUP62/NUP43/SRSF2/NDC1/NUP37/PRPF31/NPM1/NUP160/NUP88/THOC1/RAE1/SLBP/NUP35/MAGOH/RAN/AAAS	24
BP	GO:0034502	protein localization to chromosome	20/443	85/18866	5.85043e-15	2.52198e-13	1.92993e-13	MSH2/NDC80/TTK/CDK1/DKC1/BUB3/RUVBL2/MCM8/CCT8/SPDL1/CCT4/XRCC5/CDCA5/PLK1/CDT1/AURKB/EZH2/RPA2/PPHLN1/PIH1D1	20
BP	GO:0051783	regulation of nuclear division	28/443	188/18866	6.12096e-15	2.59863e-13	1.98858e-13	HNRNPU/NDC80/CHEK1/KIF20B/TTK/NEK2/UBE2C/FBXO5/NUP62/CENPE/GEN1/BUB3/AURKA/RCC1/BUB1B/KIF11/MAD2L1/SPDL1/CDC25C/CCNB1/KNTC1/CDCA5/BUB1/PLK1/BORA/CDT1/AURKB/CDC23	28
BP	GO:0015931	nucleobase-containing compound transport	32/443	261/18866	1.96638e-14	8.22358e-13	6.29303e-13	HNRNPA2B1/SRSF1/HNRNPU/SSB/PNPT1/SRSF3/XPO1/CPSF3/SRSF7/MAGOHB/NUP62/SFPQ/NUP43/SRSF2/NDC1/CETN3/NUP37/KHDRBS1/DHX9/HNRNPA1/NPM1/NUP160/NUP88/THOC1/RAE1/SLBP/NUP35/RBM27/MAGOH/RAN/LRPPRC/AAAS	32
BP	GO:0071426	ribonucleoprotein complex export from nucleus	23/443	130/18866	3.85234e-14	1.58739e-12	1.21474e-12	HNRNPA2B1/SRSF1/SSB/SRSF3/XPO1/CPSF3/SRSF7/MAGOHB/NUP62/NUP43/SRSF2/NDC1/NUP37/NPM1/NUP160/NUP88/THOC1/RAE1/SLBP/NUP35/MAGOH/RAN/AAAS	23
BP	GO:0051052	regulation of DNA metabolic process	37/443	365/18866	7.35093e-14	2.98512e-12	2.28434e-12	HNRNPA2B1/MSH2/HNRNPU/MIS18A/FIGNL1/CHEK1/NEK2/FUS/DKC1/HNRNPC/HMGB1/PARPBP/CCT8/PTGES3/PIF1/CCT4/HNRNPD/XRCC5/RMI2/CHTF18/PCNA/CDK2/DHX9/HNRNPA1/NPM1/RAD51/THOC1/CDT1/AURKB/FANCB/DNAJC2/RFC5/RFC3/BRCA1/RPA2/NVL/DEK	37
BP	GO:0090307	mitotic spindle assembly	17/443	65/18866	9.82218e-14	3.93168e-12	3.00869e-12	HNRNPU/NEK2/TPX2/RCC1/SMC3/KPNB1/KIF11/BCCIP/CHEK2/KIF4A/PLK1/KIFC1/AURKB/MZT1/KIF23/KIF4B/AAAS	17
BP	GO:0030071	regulation of mitotic metaphase/anaphase transition	16/443	56/18866	1.15013e-13	4.53895e-12	3.4734e-12	NDC80/TTK/UBE2C/FBXO5/CENPE/GEN1/BUB3/BUB1B/MAD2L1/SPDL1/CCNB1/BUB1/PLK1/CDT1/AURKB/CDC23	16
BP	GO:0051028	mRNA transport	24/443	152/18866	1.46716e-13	5.7097e-12	4.36931e-12	HNRNPA2B1/SRSF1/SRSF3/XPO1/CPSF3/SRSF7/MAGOHB/NUP62/NUP43/SRSF2/NDC1/CETN3/NUP37/DHX9/HNRNPA1/NUP160/NUP88/THOC1/RAE1/SLBP/NUP35/MAGOH/LRPPRC/AAAS	24
BP	GO:0090068	positive regulation of cell cycle process	33/443	302/18866	2.10585e-13	7.9018e-12	6.0468e-12	HNRNPU/NDC80/KIF20B/CDK1/UBE2C/FBXO5/CDC25A/NUP62/SFPQ/PRMT1/GEN1/AURKA/CDC7/MAD2L1/PLK4/FEN1/CDC25C/KIF14/CCNB1/CHEK2/CDCA5/PCNA/CDK2/DTL/NPM1/CDT1/AURKB/EZH2/BRCA1/KIF23/CDC23/DBF4/TRIAP1	33
BP	GO:0007091	metaphase/anaphase transition of mitotic cell cycle	16/443	58/18866	2.11504e-13	7.9018e-12	6.0468e-12	NDC80/TTK/UBE2C/FBXO5/CENPE/GEN1/BUB3/BUB1B/MAD2L1/SPDL1/CCNB1/BUB1/PLK1/CDT1/AURKB/CDC23	16
BP	GO:1902099	regulation of metaphase/anaphase transition of cell cycle	16/443	58/18866	2.11504e-13	7.9018e-12	6.0468e-12	NDC80/TTK/UBE2C/FBXO5/CENPE/GEN1/BUB3/BUB1B/MAD2L1/SPDL1/CCNB1/BUB1/PLK1/CDT1/AURKB/CDC23	16
BP	GO:0072331	signal transduction by p53 class mediator	31/443	267/18866	2.25867e-13	8.32737e-12	6.37246e-12	DNA2/MSH2/CHEK1/BCL2L12/CDK1/RPA3/TPX2/PRMT1/AURKA/TFAP4/HNRNPK/CDC25C/CCNB1/RMI2/PRMT6/CHEK2/PCNA/BARD1/CDK2/HDAC2/AURKB/SSRP1/RFC5/TAF5/EXO1/RFC3/BRCA1/RPA2/USP28/TRIAP1/PAK1IP1	31
BP	GO:0050000	chromosome localization	18/443	79/18866	2.46893e-13	8.86914e-12	6.78705e-12	HNRNPU/NDC80/NUF2/NUP62/CENPE/KIF18A/KIF22/KPNB1/SPDL1/KIF2C/KIF14/CCNB1/CDCA5/CDCA8/CDT1/KIFC1/AURKB/CDC23	18
BP	GO:0051303	establishment of chromosome localization	18/443	79/18866	2.46893e-13	8.86914e-12	6.78705e-12	HNRNPU/NDC80/NUF2/NUP62/CENPE/KIF18A/KIF22/KPNB1/SPDL1/KIF2C/KIF14/CCNB1/CDCA5/CDCA8/CDT1/KIFC1/AURKB/CDC23	18
BP	GO:0051225	spindle assembly	21/443	115/18866	2.63113e-13	9.33218e-12	7.14138e-12	HNRNPU/NEK2/FBXO5/TPX2/AURKA/RCC1/SMC3/KPNB1/KIF11/BCCIP/CHEK2/KIF4A/PLK1/HAUS8/KIFC1/AURKB/MZT1/KIF23/KIF4B/ASPM/AAAS	21
BP	GO:0032392	DNA geometric change	21/443	116/18866	3.14406e-13	1.10121e-11	8.42692e-12	HNRNPA2B1/DNA2/HMGB2/DDX1/MCM6/RUVBL2/HMGB1/MCM8/PIF1/XRCC5/GTF2H3/RECQL4/CHTF18/DHX9/MCM4/RAD51/RAD54B/RFC5/RFC3/GINS4/RAD54L	21
BP	GO:0044784	metaphase/anaphase transition of cell cycle	16/443	60/18866	3.79059e-13	1.31126e-11	1.00343e-11	NDC80/TTK/UBE2C/FBXO5/CENPE/GEN1/BUB3/BUB1B/MAD2L1/SPDL1/CCNB1/BUB1/PLK1/CDT1/AURKB/CDC23	16
BP	GO:0010965	regulation of mitotic sister chromatid separation	16/443	61/18866	5.02894e-13	1.71843e-11	1.31501e-11	NDC80/TTK/UBE2C/FBXO5/CENPE/GEN1/BUB3/BUB1B/MAD2L1/SPDL1/CCNB1/BUB1/PLK1/CDT1/AURKB/CDC23	16
BP	GO:0033047	regulation of mitotic sister chromatid segregation	17/443	72/18866	6.1317e-13	2.07e-11	1.58405e-11	HNRNPU/NDC80/TTK/UBE2C/FBXO5/CENPE/GEN1/BUB3/BUB1B/MAD2L1/SPDL1/CCNB1/BUB1/PLK1/CDT1/AURKB/CDC23	17
BP	GO:0045005	DNA-dependent DNA replication maintenance of fidelity	14/443	44/18866	7.64065e-13	2.5487e-11	1.95038e-11	DNA2/EME1/GEN1/POLD1/MMS22L/PCNA/TIPIN/RFWD3/TONSL/RAD51/THOC1/DONSON/ZGRF1/ZNF830	14
BP	GO:0045841	negative regulation of mitotic metaphase/anaphase transition	13/443	36/18866	7.83607e-13	2.58314e-11	1.97673e-11	NDC80/TTK/FBXO5/GEN1/BUB3/BUB1B/MAD2L1/SPDL1/CCNB1/BUB1/PLK1/CDT1/AURKB	13
BP	GO:0045787	positive regulation of cell cycle	37/443	396/18866	8.98574e-13	2.92768e-11	2.24039e-11	HNRNPU/NDC80/CHEK1/KIF20B/CDK1/UBE2C/FBXO5/CDC25A/NUP62/SFPQ/PRMT1/GEN1/AURKA/TFAP4/CDC7/MAD2L1/PLK4/FEN1/CDC25C/KIF14/CCNB1/CHEK2/CDCA5/PCNA/CDK2/DTL/NPM1/THOC1/CDT1/AURKB/CKS1B/EZH2/BRCA1/KIF23/CDC23/DBF4/TRIAP1	37
BP	GO:0000077	DNA damage checkpoint	23/443	151/18866	1.03822e-12	3.3438e-11	2.55882e-11	MSH2/CHEK1/EME1/CDK1/PRMT1/AURKA/CDC25C/CCNB1/CLSPN/CHEK2/PCNA/TIPIN/CDK2/PLK1/RFWD3/DTL/THOC1/BRCA1/RPA2/DONSON/ZNF830/USP28/TRIAP1	23
BP	GO:0051306	mitotic sister chromatid separation	16/443	64/18866	1.13567e-12	3.61608e-11	2.76718e-11	NDC80/TTK/UBE2C/FBXO5/CENPE/GEN1/BUB3/BUB1B/MAD2L1/SPDL1/CCNB1/BUB1/PLK1/CDT1/AURKB/CDC23	16
BP	GO:1902100	negative regulation of metaphase/anaphase transition of cell cycle	13/443	37/18866	1.18251e-12	3.72292e-11	2.84894e-11	NDC80/TTK/FBXO5/GEN1/BUB3/BUB1B/MAD2L1/SPDL1/CCNB1/BUB1/PLK1/CDT1/AURKB	13
BP	GO:0006611	protein export from nucleus	25/443	184/18866	1.48752e-12	4.63116e-11	3.54396e-11	HNRNPA2B1/SRSF1/SSB/SRSF3/XPO1/CPSF3/SRSF7/MAGOHB/NUP62/NUP43/SRSF2/NDC1/NUP37/CSE1L/BARD1/NPM1/NUP160/NUP88/THOC1/RAE1/SLBP/NUP35/MAGOH/RAN/AAAS	25
BP	GO:1905818	regulation of chromosome separation	16/443	66/18866	1.90482e-12	5.86516e-11	4.48827e-11	NDC80/TTK/UBE2C/FBXO5/CENPE/GEN1/BUB3/BUB1B/MAD2L1/SPDL1/CCNB1/BUB1/PLK1/CDT1/AURKB/CDC23	16
BP	GO:2000816	negative regulation of mitotic sister chromatid separation	13/443	39/18866	2.58332e-12	7.86788e-11	6.02084e-11	NDC80/TTK/FBXO5/GEN1/BUB3/BUB1B/MAD2L1/SPDL1/CCNB1/BUB1/PLK1/CDT1/AURKB	13
BP	GO:1905819	negative regulation of chromosome separation	13/443	40/18866	3.74622e-12	1.1287e-10	8.63729e-11	NDC80/TTK/FBXO5/GEN1/BUB3/BUB1B/MAD2L1/SPDL1/CCNB1/BUB1/PLK1/CDT1/AURKB	13
BP	GO:0051304	chromosome separation	18/443	94/18866	5.84523e-12	1.74238e-10	1.33334e-10	NDC80/EME1/TTK/UBE2C/FBXO5/CENPE/GEN1/BUB3/BUB1B/MAD2L1/SPDL1/NCAPH/CCNB1/BUB1/PLK1/CDT1/AURKB/CDC23	18
BP	GO:0031145	anaphase-promoting complex-dependent catabolic process	17/443	83/18866	7.27043e-12	2.12535e-10	1.62641e-10	CDK1/UBE2C/FBXO5/BUB3/AURKA/BUB1B/MAD2L1/CCNB1/PSMD13/CDK2/PLK1/PSMD14/AURKB/PSMA1/PSMD1/CDC23/PSMA2	17
BP	GO:0044774	mitotic DNA integrity checkpoint	19/443	108/18866	7.28171e-12	2.12535e-10	1.62641e-10	MSH2/EME1/CDK1/PRMT1/AURKA/ORC1/CDC25C/CCNB1/CLSPN/NAE1/CHEK2/PCNA/TIPIN/CDK2/RFWD3/RPA2/DONSON/ZNF830/TRIAP1	19
BP	GO:0033048	negative regulation of mitotic sister chromatid segregation	13/443	42/18866	7.61221e-12	2.19891e-10	1.6827e-10	NDC80/TTK/FBXO5/GEN1/BUB3/BUB1B/MAD2L1/SPDL1/CCNB1/BUB1/PLK1/CDT1/AURKB	13
BP	GO:0031023	microtubule organizing center organization	21/443	136/18866	7.77201e-12	2.22216e-10	1.70049e-10	NDC80/CHEK1/XRCC2/SASS6/XPO1/NEK2/CDK1/NUP62/CEP152/GEN1/AURKA/KIF11/CETN3/PLK4/CDK2/PLK1/HAUS8/NPM1/MCIDAS/BRCA1/CEP131	21
BP	GO:0007094	mitotic spindle assembly checkpoint	12/443	34/18866	8.32536e-12	2.28703e-10	1.75013e-10	NDC80/TTK/GEN1/BUB3/BUB1B/MAD2L1/SPDL1/CCNB1/BUB1/PLK1/CDT1/AURKB	12
BP	GO:0031577	spindle checkpoint	12/443	34/18866	8.32536e-12	2.28703e-10	1.75013e-10	NDC80/TTK/GEN1/BUB3/BUB1B/MAD2L1/SPDL1/CCNB1/BUB1/PLK1/CDT1/AURKB	12
BP	GO:0071173	spindle assembly checkpoint	12/443	34/18866	8.32536e-12	2.28703e-10	1.75013e-10	NDC80/TTK/GEN1/BUB3/BUB1B/MAD2L1/SPDL1/CCNB1/BUB1/PLK1/CDT1/AURKB	12
BP	GO:0071174	mitotic spindle checkpoint	12/443	34/18866	8.32536e-12	2.28703e-10	1.75013e-10	NDC80/TTK/GEN1/BUB3/BUB1B/MAD2L1/SPDL1/CCNB1/BUB1/PLK1/CDT1/AURKB	12
BP	GO:2000278	regulation of DNA biosynthetic process	19/443	109/18866	8.63064e-12	2.34787e-10	1.79669e-10	HNRNPA2B1/HNRNPU/NEK2/DKC1/HNRNPC/CCT8/PTGES3/PIF1/CCT4/HNRNPD/XRCC5/CHTF18/PCNA/HNRNPA1/AURKB/DNAJC2/RFC5/RFC3/NVL	19
BP	GO:0050684	regulation of mRNA processing	22/443	152/18866	9.27307e-12	2.49838e-10	1.91187e-10	HNRNPA2B1/SRSF1/RBMX/NCL/HNRNPU/SRSF3/SRSF7/SNRPA/SRSF2/SRSF10/HNRNPK/KHDRBS1/CCNB1/BARD1/DHX9/HNRNPA1/TRA2A/HNRNPL/MAGOH/NUDT21/CTR9/SNRNP70	22
BP	GO:0032201	telomere maintenance via semi-conservative replication	11/443	27/18866	9.8335e-12	2.59386e-10	1.98493e-10	DNA2/RPA3/PRIM1/POLD1/POLE2/FEN1/PRIM2/PCNA/RFC5/RFC3/RPA2	11
BP	GO:0045839	negative regulation of mitotic nuclear division	14/443	52/18866	9.90516e-12	2.59386e-10	1.98493e-10	NDC80/CHEK1/TTK/FBXO5/GEN1/BUB3/BUB1B/MAD2L1/SPDL1/CCNB1/BUB1/PLK1/CDT1/AURKB	14
BP	GO:0090329	regulation of DNA-dependent DNA replication	14/443	52/18866	9.90516e-12	2.59386e-10	1.98493e-10	FBXO5/GMNN/CDC7/CHEK2/CHTF18/PCNA/TIPIN/CDK2/CDT1/RFC5/RFC3/DONSON/ZNF830/DBF4	14
BP	GO:0031123	RNA 3'-end processing	22/443	153/18866	1.05988e-11	2.7498e-10	2.10427e-10	SRSF1/SSB/PNPT1/SRSF3/CPSF3/SRSF7/DKC1/MAGOHB/SNRPA/SRSF2/EXOSC9/CCNB1/BARD1/ZNF473/EXOSC2/THOC1/SLBP/MTPAP/FBL/MAGOH/NUDT21/CTR9	22
BP	GO:0007098	centrosome cycle	20/443	125/18866	1.25676e-11	3.23067e-10	2.47225e-10	NDC80/CHEK1/XRCC2/SASS6/XPO1/NEK2/CDK1/NUP62/CEP152/GEN1/AURKA/KIF11/CETN3/PLK4/CDK2/PLK1/HAUS8/NPM1/BRCA1/CEP131	20
BP	GO:0033046	negative regulation of sister chromatid segregation	13/443	44/18866	1.48386e-11	3.77979e-10	2.89246e-10	NDC80/TTK/FBXO5/GEN1/BUB3/BUB1B/MAD2L1/SPDL1/CCNB1/BUB1/PLK1/CDT1/AURKB	13
BP	GO:0006406	mRNA export from nucleus	19/443	113/18866	1.67155e-11	4.18186e-10	3.20014e-10	HNRNPA2B1/SRSF1/SRSF3/CPSF3/SRSF7/MAGOHB/NUP62/NUP43/SRSF2/NDC1/NUP37/NUP160/NUP88/THOC1/RAE1/SLBP/NUP35/MAGOH/AAAS	19
BP	GO:0071427	mRNA-containing ribonucleoprotein complex export from nucleus	19/443	113/18866	1.67155e-11	4.18186e-10	3.20014e-10	HNRNPA2B1/SRSF1/SRSF3/CPSF3/SRSF7/MAGOHB/NUP62/NUP43/SRSF2/NDC1/NUP37/NUP160/NUP88/THOC1/RAE1/SLBP/NUP35/MAGOH/AAAS	19
BP	GO:0051985	negative regulation of chromosome segregation	13/443	45/18866	2.04257e-11	5.06486e-10	3.87584e-10	NDC80/TTK/FBXO5/GEN1/BUB3/BUB1B/MAD2L1/SPDL1/CCNB1/BUB1/PLK1/CDT1/AURKB	13
BP	GO:0097064	ncRNA export from nucleus	12/443	38/18866	3.77512e-11	9.27885e-10	7.10057e-10	SSB/NUP62/NUP43/NDC1/NUP37/NPM1/NUP160/NUP88/RAE1/NUP35/RAN/AAAS	12
BP	GO:2001251	negative regulation of chromosome organization	21/443	148/18866	4.06789e-11	9.9115e-10	7.58471e-10	HNRNPU/NDC80/TTK/FBXO5/GEN1/BUB3/HNRNPC/BUB1B/MAD2L1/PIF1/SPDL1/XRCC5/CCNB1/PRMT6/BUB1/HNRNPA1/PLK1/CDT1/AURKB/BRCA1/PIH1D1	21
BP	GO:1901796	regulation of signal transduction by p53 class mediator	23/443	180/18866	4.24651e-11	1.02575e-09	7.84949e-10	DNA2/CHEK1/BCL2L12/RPA3/TPX2/AURKA/HNRNPK/RMI2/PRMT6/CHEK2/BARD1/CDK2/HDAC2/AURKB/SSRP1/RFC5/TAF5/EXO1/RFC3/BRCA1/RPA2/TRIAP1/PAK1IP1	23
BP	GO:2000573	positive regulation of DNA biosynthetic process	15/443	69/18866	5.11266e-11	1.22442e-09	9.36975e-10	HNRNPA2B1/NEK2/DKC1/CCT8/PTGES3/CCT4/HNRNPD/XRCC5/CHTF18/PCNA/HNRNPA1/AURKB/RFC5/RFC3/NVL	15
BP	GO:0051321	meiotic cell cycle	27/443	254/18866	6.47349e-11	1.53718e-09	1.17632e-09	FIGNL1/XRCC2/EME1/TTK/NUF2/FANCA/NEK2/FBXO5/CDC25A/KIF18A/BUB3/AURKA/SMC3/BUB1B/NDC1/NCAPH/CDC25C/PSMD13/BUB1/CDK2/PLK1/RAD51/RAD54B/MASTL/EXO1/ASPM/RAD54L	27
BP	GO:0051784	negative regulation of nuclear division	14/443	60/18866	8.18307e-11	1.9268e-09	1.47447e-09	NDC80/CHEK1/TTK/FBXO5/GEN1/BUB3/BUB1B/MAD2L1/SPDL1/CCNB1/BUB1/PLK1/CDT1/AURKB	14
BP	GO:0006409	tRNA export from nucleus	11/443	34/18866	1.86045e-10	4.27293e-09	3.26983e-09	SSB/NUP62/NUP43/NDC1/NUP37/NUP160/NUP88/RAE1/NUP35/RAN/AAAS	11
BP	GO:0008608	attachment of spindle microtubules to kinetochore	11/443	34/18866	1.86045e-10	4.27293e-09	3.26983e-09	HNRNPU/NDC80/NUF2/NEK2/KNSTRN/CENPE/BUB3/KIF2C/CCNB1/CDT1/AURKB	11
BP	GO:0071431	tRNA-containing ribonucleoprotein complex export from nucleus	11/443	34/18866	1.86045e-10	4.27293e-09	3.26983e-09	SSB/NUP62/NUP43/NDC1/NUP37/NUP160/NUP88/RAE1/NUP35/RAN/AAAS	11
BP	GO:0031124	mRNA 3'-end processing	17/443	101/18866	1.93598e-10	4.37469e-09	3.3477e-09	SRSF1/PNPT1/SRSF3/CPSF3/SRSF7/MAGOHB/SNRPA/SRSF2/CCNB1/BARD1/ZNF473/THOC1/SLBP/MTPAP/MAGOH/NUDT21/CTR9	17
BP	GO:0044773	mitotic DNA damage checkpoint	17/443	101/18866	1.93598e-10	4.37469e-09	3.3477e-09	MSH2/EME1/CDK1/PRMT1/AURKA/CDC25C/CCNB1/CLSPN/CHEK2/PCNA/TIPIN/CDK2/RFWD3/RPA2/DONSON/ZNF830/TRIAP1	17
BP	GO:0022618	ribonucleoprotein complex assembly	25/443	233/18866	2.74058e-10	6.14329e-09	4.70111e-09	SRSF1/RBMX/DDX1/EIF3B/GEMIN6/MRTO4/RUVBL2/SRSF10/PTGES3/GCFC2/BRIX1/XRCC5/SNRPG/PRPF31/SNRPE/DHX9/COIL/NLE1/ZNHIT6/CLNS1A/SNRPB/EIF3J/NUDT21/TGS1/PIH1D1	25
BP	GO:0051054	positive regulation of DNA metabolic process	23/443	200/18866	3.62287e-10	8.05657e-09	6.16524e-09	HNRNPA2B1/MSH2/NEK2/FUS/DKC1/HMGB1/CCT8/PTGES3/CCT4/HNRNPD/XRCC5/CHTF18/PCNA/CDK2/DHX9/HNRNPA1/RAD51/AURKB/FANCB/RFC5/RFC3/BRCA1/NVL	23
BP	GO:0071826	ribonucleoprotein complex subunit organization	25/443	240/18866	5.14085e-10	1.13422e-08	8.67957e-09	SRSF1/RBMX/DDX1/EIF3B/GEMIN6/MRTO4/RUVBL2/SRSF10/PTGES3/GCFC2/BRIX1/XRCC5/SNRPG/PRPF31/SNRPE/DHX9/COIL/NLE1/ZNHIT6/CLNS1A/SNRPB/EIF3J/NUDT21/TGS1/PIH1D1	25
BP	GO:0051031	tRNA transport	11/443	37/18866	5.21772e-10	1.14219e-08	8.74054e-09	SSB/NUP62/NUP43/NDC1/NUP37/NUP160/NUP88/RAE1/NUP35/RAN/AAAS	11
BP	GO:0032508	DNA duplex unwinding	17/443	108/18866	5.73626e-10	1.23639e-08	9.46135e-09	DNA2/DDX1/MCM6/RUVBL2/MCM8/PIF1/XRCC5/GTF2H3/RECQL4/CHTF18/DHX9/MCM4/RAD51/RAD54B/RFC5/RFC3/GINS4	17
BP	GO:1902750	negative regulation of cell cycle G2/M phase transition	17/443	108/18866	5.73626e-10	1.23639e-08	9.46135e-09	CHEK1/CDK1/AURKA/ORC1/CLSPN/NAE1/PSMD13/PLK1/DTL/PSMD14/AURKB/PSMA1/PSMD1/BRCA1/DONSON/ZNF830/PSMA2	17
BP	GO:0006270	DNA replication initiation	11/443	39/18866	9.80446e-10	2.09711e-08	1.6048e-08	ORC6/PRIM1/MCM10/MCM6/POLE2/ORC1/PRIM2/CDK2/MCM4/CDT1/ORC3	11
BP	GO:0031503	protein-containing complex localization	27/443	291/18866	1.38067e-09	2.93079e-08	2.24277e-08	HNRNPA2B1/SRSF1/HNRNPU/SSB/SRSF3/XPO1/CPSF3/SRSF7/MAGOHB/NUP62/SFPQ/NUP43/SRSF2/NDC1/NUP37/NPM1/NUP160/NUP88/THOC1/RAE1/SLBP/NUP35/MZT1/MAGOH/RAN/CEP131/AAAS	27
BP	GO:1903312	negative regulation of mRNA metabolic process	15/443	88/18866	1.90366e-09	4.01056e-08	3.06905e-08	HNRNPA2B1/RBMX/HNRNPU/FUS/SRSF7/HNRNPC/SRSF10/HNRNPK/HNRNPD/TARDBP/BARD1/DHX9/HNRNPL/CTR9/DHX34	15
BP	GO:2001252	positive regulation of chromosome organization	21/443	182/18866	2.00524e-09	4.19304e-08	3.2087e-08	HNRNPA2B1/HNRNPU/NEK2/DKC1/SFPQ/RUVBL2/CCT8/CCT4/HNRNPD/XRCC5/FEN1/CCNB1/EED/HNRNPA1/CDT1/AURKB/BRCA1/PPHLN1/CDC23/CTR9/PIH1D1	21
BP	GO:0071824	protein-DNA complex subunit organization	26/443	282/18866	3.20277e-09	6.64752e-08	5.08697e-08	MIS18A/NASP/HMGB2/CENPK/HJURP/RPA3/CENPL/CENPE/HELLS/ANP32E/MCM6/ITGB3BP/HMGB1/GMNN/PTMA/ASF1B/GTF2H3/CENPH/CHAF1B/NPM1/MCM4/RAD51/CDT1/ORC3/RPA2/PIH1D1	26
BP	GO:0065004	protein-DNA complex assembly	24/443	243/18866	3.35102e-09	6.90409e-08	5.28331e-08	MIS18A/NASP/HMGB2/CENPK/HJURP/RPA3/CENPL/CENPE/HELLS/MCM6/ITGB3BP/HMGB1/GMNN/ASF1B/GTF2H3/CENPH/CHAF1B/NPM1/MCM4/RAD51/CDT1/ORC3/RPA2/PIH1D1	24
BP	GO:0006401	RNA catabolic process	32/443	415/18866	4.21135e-09	8.6133e-08	6.59126e-08	DNA2/LSM5/HNRNPU/SSB/PNPT1/XPO1/FUS/DKC1/MAGOHB/HNRNPM/MRTO4/HNRNPC/HNRNPR/EXOSC9/HNRNPD/FEN1/TARDBP/TBRG4/PSMD13/DHX9/NPM1/EXOSC2/PSMD14/PSMA1/PSMD1/MTPAP/MAGOH/ANP32A/LRPPRC/PSMA2/LSM6/DHX34	32
BP	GO:0043484	regulation of RNA splicing	19/443	156/18866	4.80124e-09	9.74861e-08	7.46005e-08	HNRNPA2B1/SRSF1/RBMX/NCL/HNRNPU/HNRNPH3/SRSF3/FUS/SRSF7/SRSF2/SRSF10/HNRNPK/KHDRBS1/HNRNPA1/TRA2A/RRP1B/HNRNPL/MAGOH/SNRNP70	19
BP	GO:0031297	replication fork processing	10/443	35/18866	5.0001e-09	1.00793e-07	7.71315e-08	DNA2/EME1/GEN1/MMS22L/PCNA/RFWD3/TONSL/RAD51/THOC1/ZGRF1	10
BP	GO:0010833	telomere maintenance via telomere lengthening	14/443	81/18866	5.48769e-09	1.09832e-07	8.40483e-08	HNRNPA2B1/HNRNPU/NEK2/DKC1/HNRNPC/GAR1/CCT8/PTGES3/PIF1/CCT4/XRCC5/HNRNPA1/RAD51/AURKB	14
BP	GO:1903046	meiotic cell cycle process	21/443	193/18866	5.82142e-09	1.15685e-07	8.85273e-08	FIGNL1/EME1/TTK/NUF2/FANCA/FBXO5/CDC25A/KIF18A/AURKA/BUB1B/NDC1/NCAPH/CDC25C/PSMD13/BUB1/PLK1/RAD51/RAD54B/MASTL/ASPM/RAD54L	21
BP	GO:0075733	intracellular transport of virus	12/443	57/18866	6.58433e-09	1.29925e-07	9.94239e-08	XPO1/NUP62/NUP43/KPNB1/NDC1/NUP37/NUP160/NUP88/RAE1/NUP35/RAN/AAAS	12
BP	GO:0048024	regulation of mRNA splicing, via spliceosome	16/443	113/18866	8.98727e-09	1.761e-07	1.34759e-07	HNRNPA2B1/SRSF1/RBMX/NCL/HNRNPU/SRSF3/SRSF7/SRSF2/SRSF10/HNRNPK/KHDRBS1/HNRNPA1/TRA2A/HNRNPL/MAGOH/SNRNP70	16
BP	GO:0140053	mitochondrial gene expression	19/443	165/18866	1.22477e-08	2.3832e-07	1.82373e-07	PNPT1/MTIF2/MRPS9/TFAM/MRPL19/DAP3/MRPL32/DARS2/MRPL1/TBRG4/MALSU1/TEFM/RMND1/TSFM/TFB2M/PTCD3/MRPL16/IARS2/LRPPRC	19
BP	GO:0072401	signal transduction involved in DNA integrity checkpoint	13/443	73/18866	1.328e-08	2.54867e-07	1.95035e-07	CHEK1/CDK1/PRMT1/AURKA/CDC25C/CCNB1/CHEK2/PCNA/CDK2/PLK1/DTL/BRCA1/TRIAP1	13
BP	GO:0072422	signal transduction involved in DNA damage checkpoint	13/443	73/18866	1.328e-08	2.54867e-07	1.95035e-07	CHEK1/CDK1/PRMT1/AURKA/CDC25C/CCNB1/CHEK2/PCNA/CDK2/PLK1/DTL/BRCA1/TRIAP1	13
BP	GO:0000380	alternative mRNA splicing, via spliceosome	14/443	87/18866	1.43189e-08	2.72935e-07	2.08862e-07	SRSF1/RBMX/HNRNPU/SRSF3/SRSF7/HNRNPM/SFPQ/SRSF2/SRSF10/KHDRBS1/DHX9/HNRNPA1/HNRNPL/MAGOH	14
BP	GO:0042273	ribosomal large subunit biogenesis	13/443	74/18866	1.57704e-08	2.96569e-07	2.26947e-07	MRTO4/BRIX1/RRP15/MRPL1/MALSU1/RSL1D1/NPM1/GTPBP4/NLE1/ZNHIT6/NVL/PAK1IP1/WDR74	13
BP	GO:0072395	signal transduction involved in cell cycle checkpoint	13/443	74/18866	1.57704e-08	2.96569e-07	2.26947e-07	CHEK1/CDK1/PRMT1/AURKA/CDC25C/CCNB1/CHEK2/PCNA/CDK2/PLK1/DTL/BRCA1/TRIAP1	13
BP	GO:0045931	positive regulation of mitotic cell cycle	19/443	168/18866	1.64943e-08	3.08113e-07	2.35782e-07	HNRNPU/NDC80/KIF20B/CDK1/UBE2C/FBXO5/CDC25A/NUP62/GEN1/AURKA/CDC7/MAD2L1/CDC25C/CCNB1/CDCA5/DTL/CDT1/AURKB/CDC23	19
BP	GO:0051315	attachment of mitotic spindle microtubules to kinetochore	7/443	15/18866	2.05342e-08	3.81039e-07	2.91587e-07	HNRNPU/NDC80/NUF2/CENPE/KIF2C/CDT1/AURKB	7
BP	GO:0006278	RNA-dependent DNA biosynthetic process	13/443	76/18866	2.20534e-08	4.03985e-07	3.09147e-07	HNRNPU/NEK2/DKC1/HNRNPC/GAR1/CCT8/PTGES3/PIF1/CCT4/XRCC5/HNRNPA1/AURKB/PPIA	13
BP	GO:0061013	regulation of mRNA catabolic process	21/443	208/18866	2.20592e-08	4.03985e-07	3.09147e-07	HNRNPU/PNPT1/XPO1/FUS/HNRNPM/HNRNPC/HNRNPR/EXOSC9/HNRNPD/TARDBP/TBRG4/PSMD13/DHX9/NPM1/EXOSC2/PSMD14/PSMA1/PSMD1/ANP32A/PSMA2/DHX34	21
BP	GO:0070507	regulation of microtubule cytoskeleton organization	20/443	190/18866	2.36687e-08	4.30647e-07	3.29549e-07	HNRNPU/CHEK1/XPO1/NEK2/NUP62/TPX2/KIF18A/GEN1/AURKA/RCC1/SKA3/KIF11/PLK4/PLK1/NPM1/BORA/RAE1/SKA1/BRCA1/CEP131	20
BP	GO:0046794	transport of virus	12/443	64/18866	2.63506e-08	4.7635e-07	3.64524e-07	XPO1/NUP62/NUP43/KPNB1/NDC1/NUP37/NUP160/NUP88/RAE1/NUP35/RAN/AAAS	12
BP	GO:0070317	negative regulation of G0 to G1 transition	10/443	41/18866	2.69175e-08	4.8348e-07	3.69979e-07	CBX3/CHEK1/E2F6/PCGF6/CDC7/RRM2/EED/RAD51/EZH2/BRCA1	10
BP	GO:1901976	regulation of cell cycle checkpoint	9/443	32/18866	3.47581e-08	6.20333e-07	4.74705e-07	NDC80/GEN1/MAD2L1/CCNB1/CHEK2/RFWD3/THOC1/CDT1/RPA2	9
BP	GO:1900034	regulation of cellular response to heat	13/443	79/18866	3.57512e-08	6.34018e-07	4.85178e-07	RPA3/NUP62/NUP43/PTGES3/NDC1/NUP37/NUP160/NUP88/RAE1/DNAJC2/NUP35/RPA2/AAAS	13
BP	GO:0043487	regulation of RNA stability	20/443	195/18866	3.67195e-08	6.47094e-07	4.95184e-07	HNRNPU/XPO1/FUS/DKC1/HNRNPM/HNRNPC/HNRNPR/EXOSC9/HNRNPD/TARDBP/TBRG4/PSMD13/DHX9/NPM1/EXOSC2/PSMD14/PSMA1/PSMD1/ANP32A/PSMA2	20
BP	GO:0044766	multi-organism transport	12/443	66/18866	3.78565e-08	6.58845e-07	5.04176e-07	XPO1/NUP62/NUP43/KPNB1/NDC1/NUP37/NUP160/NUP88/RAE1/NUP35/RAN/AAAS	12
BP	GO:1902579	multi-organism localization	12/443	66/18866	3.78565e-08	6.58845e-07	5.04176e-07	XPO1/NUP62/NUP43/KPNB1/NDC1/NUP37/NUP160/NUP88/RAE1/NUP35/RAN/AAAS	12
BP	GO:0043414	macromolecule methylation	26/443	318/18866	3.83884e-08	6.63978e-07	5.08104e-07	MIS18A/SUV39H2/NDUFAF7/FAM98B/HELLS/PRMT1/TRMT6/METTL18/METTL21A/DPY30/WDR4/EED/PRMT6/CAMKMT/FDXACB1/TFB2M/SNRPB/EMG1/N6AMT1/EZH2/PRMT3/FBL/BRCA1/TGS1/CTR9/PIH1D1	26
BP	GO:0140013	meiotic nuclear division	19/443	177/18866	3.87188e-08	6.65583e-07	5.09332e-07	FIGNL1/EME1/TTK/NUF2/FANCA/FBXO5/KIF18A/AURKA/BUB1B/NDC1/NCAPH/PSMD13/BUB1/PLK1/RAD51/RAD54B/MASTL/ASPM/RAD54L	19
BP	GO:0036297	interstrand cross-link repair	11/443	55/18866	4.99052e-08	8.50308e-07	6.50692e-07	EME1/FANCA/RPA3/MCM8/FANCF/FANCL/RFWD3/RAD51/FANCB/UBE2T/RPA2	11
BP	GO:0006338	chromatin remodeling	21/443	218/18866	5.00717e-08	8.50308e-07	6.50692e-07	CBX3/MIS18A/NASP/HMGB2/SUV39H2/TFAM/CENPK/HJURP/CENPL/HELLS/ANP32E/RUVBL2/ITGB3BP/HNRNPC/HMGB1/PTMA/CENPH/HDAC2/NPM1/PPHLN1/PIH1D1	21
BP	GO:0010972	negative regulation of G2/M transition of mitotic cell cycle	14/443	96/18866	5.22658e-08	8.82221e-07	6.75113e-07	CDK1/AURKA/ORC1/CLSPN/NAE1/PSMD13/PSMD14/AURKB/PSMA1/PSMD1/BRCA1/DONSON/ZNF830/PSMA2	14
BP	GO:0000076	DNA replication checkpoint	7/443	17/18866	5.95795e-08	9.99652e-07	7.64976e-07	DNA2/ORC1/CLSPN/NAE1/TIPIN/CDT1/ZNF830	7
BP	GO:0032259	methylation	28/443	371/18866	6.32652e-08	1.05458e-06	8.07013e-07	MIS18A/SUV39H2/NDUFAF7/FAM98B/HELLS/PRMT1/SMYD5/TRMT6/METTL18/METTL21A/DPY30/WDR4/EED/PRMT6/CAMKMT/FDXACB1/TFB2M/SNRPB/EMG1/N6AMT1/EZH2/PRMT3/FBL/BRCA1/TGS1/CTR9/PIH1D1/TYMS	28
BP	GO:0007004	telomere maintenance via telomerase	12/443	69/18866	6.36063e-08	1.05458e-06	8.07013e-07	HNRNPU/NEK2/DKC1/HNRNPC/GAR1/CCT8/PTGES3/PIF1/CCT4/XRCC5/HNRNPA1/AURKB	12
BP	GO:0008334	histone mRNA metabolic process	8/443	25/18866	6.61e-08	1.08948e-06	8.33719e-07	SSB/CPSF3/SNRPG/SNRPE/ZNF473/SLBP/SNRPB/MTPAP	8
BP	GO:0070316	regulation of G0 to G1 transition	10/443	45/18866	7.04246e-08	1.15397e-06	8.83071e-07	CBX3/CHEK1/E2F6/PCGF6/CDC7/RRM2/EED/RAD51/EZH2/BRCA1	10
BP	GO:0006402	mRNA catabolic process	28/443	376/18866	8.37888e-08	1.36498e-06	1.04454e-06	LSM5/HNRNPU/SSB/PNPT1/XPO1/FUS/MAGOHB/HNRNPM/MRTO4/HNRNPC/HNRNPR/EXOSC9/HNRNPD/TARDBP/TBRG4/PSMD13/DHX9/NPM1/EXOSC2/PSMD14/PSMA1/PSMD1/MTPAP/MAGOH/ANP32A/PSMA2/LSM6/DHX34	28
BP	GO:0043488	regulation of mRNA stability	19/443	186/18866	8.60475e-08	1.39367e-06	1.0665e-06	HNRNPU/XPO1/FUS/HNRNPM/HNRNPC/HNRNPR/EXOSC9/HNRNPD/TARDBP/TBRG4/PSMD13/DHX9/NPM1/EXOSC2/PSMD14/PSMA1/PSMD1/ANP32A/PSMA2	19
BP	GO:0045023	G0 to G1 transition	10/443	46/18866	8.81176e-08	1.419e-06	1.08588e-06	CBX3/CHEK1/E2F6/PCGF6/CDC7/RRM2/EED/RAD51/EZH2/BRCA1	10
BP	GO:2001020	regulation of response to DNA damage stimulus	21/443	226/18866	9.31272e-08	1.4911e-06	1.14105e-06	FIGNL1/CHEK1/BCL2L12/FUS/FBXO5/HMGB1/PARPBP/HNRNPK/RMI2/CHEK2/PCNA/DHX9/RFWD3/RAD51/BCLAF1/THOC1/FANCB/BRCA1/RPA2/TRIAP1/DEK	21
BP	GO:0034501	protein localization to kinetochore	7/443	18/18866	9.55272e-08	1.52084e-06	1.16381e-06	NDC80/TTK/CDK1/BUB3/SPDL1/CDT1/AURKB	7
BP	GO:0046605	regulation of centrosome cycle	11/443	59/18866	1.07274e-07	1.68956e-06	1.29293e-06	CHEK1/XPO1/NEK2/NUP62/GEN1/AURKA/KIF11/PLK4/NPM1/BRCA1/CEP131	11
BP	GO:0051973	positive regulation of telomerase activity	9/443	36/18866	1.07331e-07	1.68956e-06	1.29293e-06	HNRNPA2B1/NEK2/DKC1/PTGES3/CCT4/HNRNPD/XRCC5/AURKB/NVL	9
BP	GO:0018205	peptidyl-lysine modification	29/443	405/18866	1.13764e-07	1.78082e-06	1.36276e-06	CHEK1/SUV39H2/PHF14/NUP62/NUP43/RUVBL2/NDC1/NUP37/METTL21A/DPY30/EED/PRMT6/CAMKMT/HDAC2/SAE1/NUP160/MSL3P1/UBA2/NUP88/RAE1/NUP35/N6AMT1/LIAS/TAF5/EZH2/BRCA1/CTR9/PIH1D1/AAAS	29
BP	GO:0051972	regulation of telomerase activity	10/443	48/18866	1.35577e-07	2.11048e-06	1.61503e-06	HNRNPA2B1/NEK2/DKC1/PTGES3/PIF1/CCT4/HNRNPD/XRCC5/AURKB/NVL	10
BP	GO:0006271	DNA strand elongation involved in DNA replication	7/443	19/18866	1.48201e-07	2.29426e-06	1.75566e-06	DNA2/GINS1/LIG1/PCNA/MCM4/RFC3/GINS4	7
BP	GO:1904356	regulation of telomere maintenance via telomere lengthening	11/443	61/18866	1.5363e-07	2.36522e-06	1.80997e-06	HNRNPA2B1/HNRNPU/NEK2/DKC1/HNRNPC/CCT8/PIF1/CCT4/XRCC5/HNRNPA1/AURKB	11
BP	GO:0006298	mismatch repair	9/443	38/18866	1.78264e-07	2.71899e-06	2.08069e-06	MSH2/RPA3/POLD1/HMGB1/LIG1/PCNA/PMS1/EXO1/RPA2	9
BP	GO:0071168	protein localization to chromatin	8/443	28/18866	1.78549e-07	2.71899e-06	2.08069e-06	MSH2/RUVBL2/MCM8/CDCA5/PLK1/EZH2/PPHLN1/PIH1D1	8
BP	GO:0031571	mitotic G1 DNA damage checkpoint	11/443	63/18866	2.16922e-07	3.28549e-06	2.5142e-06	CDK1/PRMT1/AURKA/CDC25C/CCNB1/CHEK2/PCNA/CDK2/RFWD3/RPA2/TRIAP1	11
BP	GO:0060249	anatomical structure homeostasis	31/443	469/18866	2.45886e-07	3.68833e-06	2.82247e-06	HNRNPA2B1/DNA2/HNRNPU/NEK2/DKC1/RPA3/PRIM1/HNRNPC/POLD1/GAR1/POLE2/CCT8/PTGES3/PIF1/CCT4/HNRNPD/XRCC5/FEN1/PRIM2/RECQL4/PCNA/BARD1/FH/HNRNPA1/RAD51/AURKB/RFC5/EXO1/RFC3/RPA2/ZNF830	31
BP	GO:0034605	cellular response to heat	15/443	125/18866	2.46152e-07	3.68833e-06	2.82247e-06	RPA3/NUP62/NUP43/PTGES3/NDC1/NUP37/HSPD1/HDAC2/NUP160/NUP88/RAE1/DNAJC2/NUP35/RPA2/AAAS	15
BP	GO:0044783	G1 DNA damage checkpoint	11/443	64/18866	2.56475e-07	3.80234e-06	2.90971e-06	CDK1/PRMT1/AURKA/CDC25C/CCNB1/CHEK2/PCNA/CDK2/RFWD3/RPA2/TRIAP1	11
BP	GO:0044819	mitotic G1/S transition checkpoint	11/443	64/18866	2.56475e-07	3.80234e-06	2.90971e-06	CDK1/PRMT1/AURKA/CDC25C/CCNB1/CHEK2/PCNA/CDK2/RFWD3/RPA2/TRIAP1	11
BP	GO:0006284	base-excision repair	9/443	40/18866	2.86827e-07	4.2078e-06	3.21999e-06	DNA2/RPA3/NEIL3/POLD1/LIG1/FEN1/PRMT6/PCNA/RPA2	9
BP	GO:0045740	positive regulation of DNA replication	9/443	40/18866	2.86827e-07	4.2078e-06	3.21999e-06	DNA2/CDK1/CACYBP/CDC7/PCNA/CDK2/DHX9/CDT1/DBF4	9
BP	GO:0006301	postreplication repair	10/443	52/18866	3.01526e-07	4.40039e-06	3.36737e-06	MSH2/RPA3/POLD1/POLE2/PCNA/DTL/RFC5/RFC3/BRCA1/RPA2	10
BP	GO:1902751	positive regulation of cell cycle G2/M phase transition	8/443	30/18866	3.22644e-07	4.68418e-06	3.58454e-06	CDK1/FBXO5/CDC25A/CDC7/CDC25C/CCNB1/DTL/NPM1	8
BP	GO:0032204	regulation of telomere maintenance	12/443	80/18866	3.44273e-07	4.97244e-06	3.80513e-06	HNRNPA2B1/HNRNPU/NEK2/DKC1/HNRNPC/CCT8/PIF1/CCT4/HNRNPD/XRCC5/HNRNPA1/AURKB	12
BP	GO:0006479	protein methylation	18/443	184/18866	3.60934e-07	5.15989e-06	3.94857e-06	SUV39H2/NDUFAF7/FAM98B/PRMT1/METTL18/METTL21A/DPY30/EED/PRMT6/CAMKMT/SNRPB/N6AMT1/EZH2/PRMT3/FBL/BRCA1/CTR9/PIH1D1	18
BP	GO:0008213	protein alkylation	18/443	184/18866	3.60934e-07	5.15989e-06	3.94857e-06	SUV39H2/NDUFAF7/FAM98B/PRMT1/METTL18/METTL21A/DPY30/EED/PRMT6/CAMKMT/SNRPB/N6AMT1/EZH2/PRMT3/FBL/BRCA1/CTR9/PIH1D1	18
BP	GO:0032210	regulation of telomere maintenance via telomerase	10/443	53/18866	3.63936e-07	5.17639e-06	3.96119e-06	HNRNPU/NEK2/DKC1/HNRNPC/CCT8/PIF1/CCT4/XRCC5/HNRNPA1/AURKB	10
BP	GO:0050686	negative regulation of mRNA processing	8/443	31/18866	4.25995e-07	6.02847e-06	4.61325e-06	HNRNPA2B1/RBMX/SRSF7/SRSF10/HNRNPK/BARD1/HNRNPL/CTR9	8
BP	GO:0071459	protein localization to chromosome, centromeric region	7/443	22/18866	4.71885e-07	6.64433e-06	5.08453e-06	NDC80/TTK/CDK1/BUB3/SPDL1/CDT1/AURKB	7
BP	GO:0051298	centrosome duplication	11/443	68/18866	4.85987e-07	6.80868e-06	5.21029e-06	NDC80/SASS6/XPO1/NUP62/CEP152/GEN1/PLK4/CDK2/NPM1/BRCA1/CEP131	11
BP	GO:0034508	centromere complex assembly	10/443	56/18866	6.2407e-07	8.69972e-06	6.6574e-06	MIS18A/NASP/CENPK/HJURP/CENPL/CENPE/HELLS/ITGB3BP/CENPH/NPM1	10
BP	GO:0006297	nucleotide-excision repair, DNA gap filling	7/443	23/18866	6.64672e-07	9.21986e-06	7.05543e-06	RPA3/POLD1/LIG1/PCNA/RFC5/RFC3/RPA2	7
BP	GO:0043486	histone exchange	10/443	59/18866	1.03408e-06	1.42733e-05	1.09225e-05	MIS18A/NASP/CENPK/HJURP/CENPL/ANP32E/ITGB3BP/PTMA/CENPH/NPM1	10
BP	GO:1902969	mitotic DNA replication	6/443	16/18866	1.06286e-06	1.45987e-05	1.11715e-05	MCM6/GINS1/LIG1/CHEK2/MCM4/RAD51	6
BP	GO:0032886	regulation of microtubule-based process	20/443	240/18866	1.07532e-06	1.46535e-05	1.12135e-05	HNRNPU/CHEK1/XPO1/NEK2/NUP62/TPX2/KIF18A/GEN1/AURKA/RCC1/SKA3/KIF11/PLK4/PLK1/NPM1/BORA/RAE1/SKA1/BRCA1/CEP131	20
BP	GO:0009411	response to UV	15/443	140/18866	1.07731e-06	1.46535e-05	1.12135e-05	MSH2/CHEK1/CDC25A/HMGN1/RUVBL2/POLD1/FEN1/PCNA/TIPIN/DTL/NPM1/PBK/AURKB/USP28/TRIAP1	15
BP	GO:0000083	regulation of transcription involved in G1/S transition of mitotic cell cycle	8/443	35/18866	1.17041e-06	1.58429e-05	1.21237e-05	E2F6/FBXO5/ORC1/RRM2/PCNA/CDT1/DHFR/TYMS	8
BP	GO:0031055	chromatin remodeling at centromere	9/443	47/18866	1.23566e-06	1.66458e-05	1.27381e-05	MIS18A/NASP/CENPK/HJURP/CENPL/HELLS/ITGB3BP/CENPH/NPM1	9
BP	GO:0043044	ATP-dependent chromatin remodeling	12/443	90/18866	1.2664e-06	1.69782e-05	1.29925e-05	MIS18A/NASP/CENPK/HJURP/CENPL/ANP32E/ITGB3BP/HNRNPC/PTMA/CENPH/HDAC2/NPM1	12
BP	GO:0006353	DNA-templated transcription, termination	11/443	75/18866	1.33977e-06	1.78763e-05	1.36797e-05	CPSF3/TAF1A/SNRPG/GTF2H3/SNRPE/DHX9/ZNF473/SLBP/SNRPB/POLR1B/NUDT21	11
BP	GO:0051656	establishment of organelle localization	28/443	432/18866	1.3957e-06	1.85344e-05	1.41833e-05	HNRNPU/NDC80/XPO1/NUF2/NUP62/CENPE/KIF18A/KIF22/KPNB1/BCCIP/MAD2L1/SPDL1/KIF2C/KIF14/CCNB1/CDCA5/PLK1/CDCA8/NPM1/NUP88/CDT1/KIFC1/AURKB/TMEM201/RAN/KIF23/CDC23/LRPPRC	28
BP	GO:0090305	nucleic acid phosphodiester bond hydrolysis	23/443	313/18866	1.52734e-06	2.01776e-05	1.54407e-05	DNA2/PNPT1/HMGB2/EME1/CPSF3/DDX1/RPA3/GEN1/POLD1/HMGB1/KPNB1/EXOSC9/MGME1/FEN1/RPP30/GTF2H3/PCNA/EXOSC2/RFC5/EXO1/RFC3/RPA2/NUDT21	23
BP	GO:0000381	regulation of alternative mRNA splicing, via spliceosome	11/443	76/18866	1.53384e-06	2.01776e-05	1.54407e-05	SRSF1/RBMX/HNRNPU/SRSF3/SRSF7/SRSF2/SRSF10/KHDRBS1/HNRNPA1/HNRNPL/MAGOH	11
BP	GO:0022616	DNA strand elongation	7/443	26/18866	1.67789e-06	2.19694e-05	1.68119e-05	DNA2/GINS1/LIG1/PCNA/MCM4/RFC3/GINS4	7
BP	GO:1904358	positive regulation of telomere maintenance via telomere lengthening	8/443	37/18866	1.84249e-06	2.40124e-05	1.83753e-05	HNRNPA2B1/NEK2/DKC1/CCT8/CCT4/XRCC5/HNRNPA1/AURKB	8
BP	GO:1901989	positive regulation of cell cycle phase transition	13/443	110/18866	1.85727e-06	2.40929e-05	1.84369e-05	CDK1/UBE2C/FBXO5/CDC25A/CDC7/CDC25C/CCNB1/CDCA5/DTL/NPM1/CDT1/EZH2/CDC23	13
BP	GO:0010971	positive regulation of G2/M transition of mitotic cell cycle	7/443	27/18866	2.21958e-06	2.86603e-05	2.19321e-05	CDK1/FBXO5/CDC25A/CDC7/CDC25C/CCNB1/DTL	7
BP	GO:0042769	DNA damage response, detection of DNA damage	8/443	38/18866	2.28628e-06	2.93861e-05	2.24875e-05	MRPS9/RPA3/POLD1/PCNA/DTL/RFC5/RFC3/RPA2	8
BP	GO:0032206	positive regulation of telomere maintenance	9/443	51/18866	2.53875e-06	3.24821e-05	2.48567e-05	HNRNPA2B1/NEK2/DKC1/CCT8/CCT4/HNRNPD/XRCC5/HNRNPA1/AURKB	9
BP	GO:0042770	signal transduction in response to DNA damage	14/443	133/18866	3.03546e-06	3.86607e-05	2.95848e-05	CHEK1/CDK1/PRMT1/AURKA/TFAP4/CDC25C/CCNB1/CHEK2/PCNA/CDK2/PLK1/DTL/BRCA1/TRIAP1	14
BP	GO:0016925	protein sumoylation	11/443	82/18866	3.30508e-06	4.19042e-05	3.20669e-05	NUP62/NUP43/NDC1/NUP37/SAE1/NUP160/UBA2/NUP88/RAE1/NUP35/AAAS	11
BP	GO:2000104	negative regulation of DNA-dependent DNA replication	6/443	19/18866	3.39163e-06	4.26341e-05	3.26255e-05	FBXO5/GMNN/CHEK2/TIPIN/DONSON/ZNF830	6
BP	GO:0006354	DNA-templated transcription, elongation	13/443	116/18866	3.39308e-06	4.26341e-05	3.26255e-05	HNRNPU/TAF1A/HMGN1/WDR43/TCERG1/GTF2H3/TEFM/TSFM/THOC1/SSRP1/POLR1B/EZH2/CTR9	13
BP	GO:0098534	centriole assembly	8/443	40/18866	3.45044e-06	4.31613e-05	3.30289e-05	SASS6/NUP62/CEP152/PLK4/CDK2/NPM1/MCIDAS/BRCA1	8
BP	GO:0006336	DNA replication-independent nucleosome assembly	9/443	53/18866	3.54764e-06	4.41799e-05	3.38084e-05	MIS18A/NASP/CENPK/HJURP/CENPL/ITGB3BP/ASF1B/CENPH/NPM1	9
BP	GO:0032543	mitochondrial translation	14/443	135/18866	3.62405e-06	4.49318e-05	3.43837e-05	MTIF2/MRPS9/MRPL19/DAP3/MRPL32/DARS2/MRPL1/MALSU1/RMND1/TSFM/PTCD3/MRPL16/IARS2/LRPPRC	14
BP	GO:0000387	spliceosomal snRNP assembly	9/443	54/18866	4.16969e-06	5.12433e-05	3.92136e-05	GEMIN6/SRSF10/SNRPG/PRPF31/SNRPE/COIL/CLNS1A/SNRPB/TGS1	9
BP	GO:0034724	DNA replication-independent nucleosome organization	9/443	54/18866	4.16969e-06	5.12433e-05	3.92136e-05	MIS18A/NASP/CENPK/HJURP/CENPL/ITGB3BP/ASF1B/CENPH/NPM1	9
BP	GO:0006323	DNA packaging	19/443	240/18866	4.25213e-06	5.20282e-05	3.98142e-05	MIS18A/NASP/HMGB2/CENPK/CDK1/HJURP/CENPL/HELLS/ITGB3BP/NCAPG/NCAPG2/NCAPH/ASF1B/CCNB1/CENPH/CDCA5/CHAF1B/NPM1/PPHLN1	19
BP	GO:0019985	translesion synthesis	8/443	42/18866	5.08225e-06	6.1915e-05	4.738e-05	RPA3/POLD1/POLE2/PCNA/DTL/RFC5/RFC3/RPA2	8
BP	GO:0006977	DNA damage response, signal transduction by p53 class mediator resulting in cell cycle arrest	9/443	56/18866	5.69863e-06	6.91236e-05	5.28964e-05	CDK1/PRMT1/AURKA/CDC25C/CCNB1/CHEK2/PCNA/CDK2/TRIAP1	9
BP	GO:0034080	CENP-A containing nucleosome assembly	8/443	43/18866	6.11688e-06	7.35601e-05	5.62913e-05	MIS18A/NASP/CENPK/HJURP/CENPL/ITGB3BP/CENPH/NPM1	8
BP	GO:0061641	CENP-A containing chromatin organization	8/443	43/18866	6.11688e-06	7.35601e-05	5.62913e-05	MIS18A/NASP/CENPK/HJURP/CENPL/ITGB3BP/CENPH/NPM1	8
BP	GO:0010639	negative regulation of organelle organization	26/443	416/18866	6.41327e-06	7.67948e-05	5.87667e-05	HNRNPU/NDC80/CHEK1/TTK/NEK2/FBXO5/TPX2/GEN1/BUB3/HNRNPC/BUB1B/MAD2L1/PIF1/SPDL1/XRCC5/CCNB1/PRMT6/BUB1/HNRNPA1/PLK1/NPM1/CDT1/AURKB/BRCA1/PIH1D1/TRIAP1	26
BP	GO:0042276	error-prone translesion synthesis	6/443	21/18866	6.51787e-06	7.77152e-05	5.9471e-05	RPA3/POLE2/PCNA/RFC5/RFC3/RPA2	6
BP	GO:0072431	signal transduction involved in mitotic G1 DNA damage checkpoint	9/443	57/18866	6.62816e-06	7.83633e-05	5.99669e-05	CDK1/PRMT1/AURKA/CDC25C/CCNB1/CHEK2/PCNA/CDK2/TRIAP1	9
BP	GO:1902400	intracellular signal transduction involved in G1 DNA damage checkpoint	9/443	57/18866	6.62816e-06	7.83633e-05	5.99669e-05	CDK1/PRMT1/AURKA/CDC25C/CCNB1/CHEK2/PCNA/CDK2/TRIAP1	9
BP	GO:0044818	mitotic G2/M transition checkpoint	7/443	32/18866	7.60068e-06	8.94464e-05	6.84482e-05	CDK1/ORC1/CLSPN/NAE1/BRCA1/DONSON/ZNF830	7
BP	GO:0006283	transcription-coupled nucleotide-excision repair	10/443	73/18866	7.62944e-06	8.94464e-05	6.84482e-05	RPA3/HMGN1/POLD1/LIG1/GTF2H3/PCNA/RFC5/RFC3/RPA2/ZNF830	10
BP	GO:0051988	regulation of attachment of spindle microtubules to kinetochore	5/443	13/18866	7.68815e-06	8.97591e-05	6.86875e-05	HNRNPU/NEK2/KNSTRN/CCNB1/AURKB	5
BP	GO:2000134	negative regulation of G1/S transition of mitotic cell cycle	13/443	126/18866	8.51545e-06	9.90053e-05	7.57631e-05	CDK1/PRMT1/AURKA/CDC25C/CCNB1/CHEK2/PCNA/CDK2/RFWD3/RBL1/EZH2/RPA2/TRIAP1	13
BP	GO:0006399	tRNA metabolic process	16/443	186/18866	8.56133e-06	9.91274e-05	7.58566e-05	NARS2/SSB/DDX1/FAM98B/DARS2/EXOSC9/TPRKB/FARSB/RPP30/TRMT6/AIMP1/WDR4/EXOSC2/IARS2/TRUB1/LSM6	16
BP	GO:0048025	negative regulation of mRNA splicing, via spliceosome	6/443	22/18866	8.78511e-06	0.000100347	7.67901e-05	HNRNPA2B1/RBMX/SRSF7/SRSF10/HNRNPK/HNRNPL	6
BP	GO:0051383	kinetochore organization	6/443	22/18866	8.78511e-06	0.000100347	7.67901e-05	NDC80/NUF2/CENPK/CENPE/CENPH/CDT1	6
BP	GO:0070987	error-free translesion synthesis	6/443	22/18866	8.78511e-06	0.000100347	7.67901e-05	RPA3/POLD1/PCNA/RFC5/RFC3/RPA2	6
BP	GO:0072413	signal transduction involved in mitotic cell cycle checkpoint	9/443	59/18866	8.88157e-06	0.000100347	7.67901e-05	CDK1/PRMT1/AURKA/CDC25C/CCNB1/CHEK2/PCNA/CDK2/TRIAP1	9
BP	GO:1902402	signal transduction involved in mitotic DNA damage checkpoint	9/443	59/18866	8.88157e-06	0.000100347	7.67901e-05	CDK1/PRMT1/AURKA/CDC25C/CCNB1/CHEK2/PCNA/CDK2/TRIAP1	9
BP	GO:1902403	signal transduction involved in mitotic DNA integrity checkpoint	9/443	59/18866	8.88157e-06	0.000100347	7.67901e-05	CDK1/PRMT1/AURKA/CDC25C/CCNB1/CHEK2/PCNA/CDK2/TRIAP1	9
BP	GO:0009408	response to heat	15/443	166/18866	9.02358e-06	0.000101542	7.77046e-05	RPA3/NUP62/NUP43/PTGES3/NDC1/NUP37/HSPD1/HDAC2/NUP160/NUP88/RAE1/DNAJC2/NUP35/RPA2/AAAS	15
BP	GO:0051984	positive regulation of chromosome segregation	7/443	33/18866	9.45331e-06	0.000105953	8.10796e-05	HNRNPU/SFPQ/FEN1/CCNB1/CDT1/AURKB/CDC23	7
BP	GO:0016569	covalent chromatin modification	28/443	481/18866	1.075e-05	0.000120006	9.18334e-05	CHEK1/SUV39H2/CDK1/PHF14/HELLS/SFPQ/PRMT1/AURKA/RUVBL2/PCGF6/CCNB1/DPY30/PPP5C/EED/PRMT6/CDK2/CCNA2/HDAC2/MSL3P1/AURKB/N6AMT1/TAF5/EZH2/FBL/BRCA1/PPHLN1/CTR9/PIH1D1	28
BP	GO:0008156	negative regulation of DNA replication	7/443	34/18866	1.16652e-05	0.000127381	9.74775e-05	FBXO5/GMNN/CHEK2/TIPIN/GTPBP4/DONSON/ZNF830	7
BP	GO:0032212	positive regulation of telomere maintenance via telomerase	7/443	34/18866	1.16652e-05	0.000127381	9.74775e-05	NEK2/DKC1/CCT8/CCT4/XRCC5/HNRNPA1/AURKB	7
BP	GO:0060236	regulation of mitotic spindle organization	7/443	34/18866	1.16652e-05	0.000127381	9.74775e-05	HNRNPU/NUP62/TPX2/RCC1/PLK1/BORA/RAE1	7
BP	GO:0007100	mitotic centrosome separation	5/443	14/18866	1.17289e-05	0.000127381	9.74775e-05	CHEK1/NEK2/NUP62/AURKA/KIF11	5
BP	GO:0090231	regulation of spindle checkpoint	5/443	14/18866	1.17289e-05	0.000127381	9.74775e-05	NDC80/GEN1/MAD2L1/CCNB1/CDT1	5
BP	GO:0090266	regulation of mitotic cell cycle spindle assembly checkpoint	5/443	14/18866	1.17289e-05	0.000127381	9.74775e-05	NDC80/GEN1/MAD2L1/CCNB1/CDT1	5
BP	GO:1903504	regulation of mitotic spindle checkpoint	5/443	14/18866	1.17289e-05	0.000127381	9.74775e-05	NDC80/GEN1/MAD2L1/CCNB1/CDT1	5
BP	GO:0010569	regulation of double-strand break repair via homologous recombination	8/443	47/18866	1.22184e-05	0.000132186	0.000101154	FIGNL1/CHEK1/FUS/PARPBP/RMI2/RAD51/FANCB/RPA2	8
BP	GO:1901992	positive regulation of mitotic cell cycle phase transition	11/443	94/18866	1.26618e-05	0.000136455	0.000104421	CDK1/UBE2C/FBXO5/CDC25A/CDC7/CDC25C/CCNB1/CDCA5/DTL/CDT1/CDC23	11
BP	GO:0051170	import into nucleus	15/443	171/18866	1.29092e-05	0.000138588	0.000106054	CDK1/NUP62/GEMIN6/KPNB1/SNRPG/TARDBP/CSE1L/SNRPE/HNRNPA1/TMCO6/NUP88/NUP35/SNRPB/E2F3/RAN	15
BP	GO:0006282	regulation of DNA repair	13/443	132/18866	1.41473e-05	0.000150725	0.000115341	FIGNL1/CHEK1/FUS/HMGB1/PARPBP/RMI2/PCNA/DHX9/RAD51/FANCB/BRCA1/RPA2/DEK	13
BP	GO:1902807	negative regulation of cell cycle G1/S phase transition	13/443	132/18866	1.41473e-05	0.000150725	0.000115341	CDK1/PRMT1/AURKA/CDC25C/CCNB1/CHEK2/PCNA/CDK2/RFWD3/RBL1/EZH2/RPA2/TRIAP1	13
BP	GO:0006369	termination of RNA polymerase II transcription	7/443	35/18866	1.42889e-05	0.000151657	0.000116055	CPSF3/SNRPG/SNRPE/ZNF473/SLBP/SNRPB/NUDT21	7
BP	GO:0051299	centrosome separation	5/443	15/18866	1.72545e-05	0.000182442	0.000139612	CHEK1/NEK2/NUP62/AURKA/KIF11	5
BP	GO:0031572	G2 DNA damage checkpoint	7/443	36/18866	1.73821e-05	0.000183101	0.000140116	CHEK1/CDK1/CLSPN/PLK1/DTL/BRCA1/DONSON	7
BP	GO:0034644	cellular response to UV	10/443	81/18866	1.95163e-05	0.000204047	0.000156146	CHEK1/CDC25A/RUVBL2/POLD1/PCNA/NPM1/PBK/AURKB/USP28/TRIAP1	10
BP	GO:0071158	positive regulation of cell cycle arrest	10/443	81/18866	1.95163e-05	0.000204047	0.000156146	CDK1/PRMT1/AURKA/CDC25C/CCNB1/CHEK2/PCNA/CDK2/BRCA1/TRIAP1	10
BP	GO:0006296	nucleotide-excision repair, DNA incision, 5'-to lesion	7/443	37/18866	2.10081e-05	0.000218017	0.000166836	RPA3/POLD1/GTF2H3/PCNA/RFC5/RFC3/RPA2	7
BP	GO:0007099	centriole replication	7/443	37/18866	2.10081e-05	0.000218017	0.000166836	SASS6/NUP62/CEP152/PLK4/CDK2/NPM1/BRCA1	7
BP	GO:1903313	positive regulation of mRNA metabolic process	10/443	82/18866	2.17679e-05	0.000225069	0.000172232	RBMX/NCL/PNPT1/HNRNPR/HNRNPD/CCNB1/TARDBP/TRA2A/NUDT21/SNRNP70	10
BP	GO:0006360	transcription by RNA polymerase I	9/443	66/18866	2.26293e-05	0.000233115	0.00017839	NCL/TCOF1/TAF1A/WDR75/WDR43/GTF2H3/NOL11/POLR1B/PIH1D1	9
BP	GO:0033119	negative regulation of RNA splicing	6/443	26/18866	2.50315e-05	0.000256916	0.000196604	HNRNPA2B1/RBMX/SRSF7/SRSF10/HNRNPK/HNRNPL	6
BP	GO:0006417	regulation of translation	26/443	450/18866	2.5221e-05	0.000257127	0.000196765	NCL/MTIF2/DDX1/TCOF1/EIF3B/EIF2AK1/HNRNPR/ILF3/HNRNPD/KHDRBS1/TARDBP/MALSU1/DHX9/RMND1/TSFM/NPM1/PA2G4/HNRNPL/PTCD3/DPH6/SRP9/EIF5B/DHFR/MAGOH/LRPPRC/TYMS	26
BP	GO:0090224	regulation of spindle organization	7/443	38/18866	2.52356e-05	0.000257127	0.000196765	HNRNPU/NUP62/TPX2/RCC1/PLK1/BORA/RAE1	7
BP	GO:1902369	negative regulation of RNA catabolic process	9/443	68/18866	2.89063e-05	0.000293462	0.000224569	HNRNPU/FUS/DKC1/HNRNPC/HNRNPD/TARDBP/DHX9/LRPPRC/DHX34	9
BP	GO:0033683	nucleotide-excision repair, DNA incision	7/443	39/18866	3.01395e-05	0.000304876	0.000233304	RPA3/POLD1/GTF2H3/PCNA/RFC5/RFC3/RPA2	7
BP	GO:0000731	DNA synthesis involved in DNA repair	8/443	53/18866	3.04503e-05	0.000306913	0.000234863	RPA3/POLD1/POLE2/PCNA/DTL/RFC5/RFC3/RPA2	8
BP	GO:0001824	blastocyst development	11/443	104/18866	3.31582e-05	0.000333008	0.000254832	NASP/NEK2/GINS1/NCAPG2/ASF1B/NLE1/EMG1/GINS4/ZNF830/CTR9/WDR74	11
BP	GO:0033262	regulation of nuclear cell cycle DNA replication	5/443	17/18866	3.41994e-05	0.000342238	0.000261895	CDC7/CHEK2/TIPIN/CDT1/DBF4	5
BP	GO:0016572	histone phosphorylation	7/443	40/18866	3.58008e-05	0.000356988	0.000273183	CHEK1/CDK1/AURKA/CCNB1/CDK2/CCNA2/AURKB	7
BP	GO:0071478	cellular response to radiation	15/443	188/18866	3.94872e-05	0.000392351	0.000300244	FIGNL1/CHEK1/CDC25A/RUVBL2/POLD1/XRCC5/CHEK2/PCNA/CAMKMT/NPM1/PBK/RAD51/AURKB/USP28/TRIAP1	15
BP	GO:0071156	regulation of cell cycle arrest	11/443	106/18866	3.96292e-05	0.000392371	0.000300259	CDK1/PRMT1/AURKA/TFAP4/CDC25C/CCNB1/CHEK2/PCNA/CDK2/BRCA1/TRIAP1	11
BP	GO:0030330	DNA damage response, signal transduction by p53 class mediator	11/443	107/18866	4.32534e-05	0.000426746	0.000326564	CDK1/PRMT1/AURKA/TFAP4/CDC25C/CCNB1/CHEK2/PCNA/CDK2/BRCA1/TRIAP1	11
BP	GO:0016570	histone modification	26/443	468/18866	4.87844e-05	0.000479627	0.000367031	CHEK1/SUV39H2/CDK1/PHF14/SFPQ/PRMT1/AURKA/RUVBL2/PCGF6/CCNB1/DPY30/PPP5C/EED/PRMT6/CDK2/CCNA2/HDAC2/MSL3P1/AURKB/N6AMT1/TAF5/EZH2/FBL/BRCA1/CTR9/PIH1D1	26
BP	GO:0032465	regulation of cytokinesis	10/443	90/18866	4.9266e-05	0.000482669	0.000369359	KIF20B/NUP62/AURKA/PLK4/KIF14/PLK1/PRPF40A/KIF20A/AURKB/KIF23	10
BP	GO:0045840	positive regulation of mitotic nuclear division	8/443	57/18866	5.23032e-05	0.000510639	0.000390763	HNRNPU/UBE2C/NUP62/AURKA/CDCA5/CDT1/AURKB/CDC23	8
BP	GO:0006289	nucleotide-excision repair	11/443	110/18866	5.58876e-05	0.00054374	0.000416093	RPA3/NEIL3/HMGN1/POLD1/LIG1/GTF2H3/PCNA/RFC5/RFC3/RPA2/ZNF830	11
BP	GO:0033314	mitotic DNA replication checkpoint	4/443	10/18866	5.62954e-05	0.00054393	0.000416239	ORC1/CLSPN/NAE1/ZNF830	4
BP	GO:0051231	spindle elongation	4/443	10/18866	5.62954e-05	0.00054393	0.000416239	KIF4A/AURKB/KIF23/KIF4B	4
BP	GO:0019080	viral gene expression	15/443	195/18866	6.0124e-05	0.000578925	0.000443019	SSB/NUP62/EIF3B/NUP43/TFAP4/NDC1/NUP37/TARDBP/DHX9/NUP160/RRP1B/NUP88/RAE1/NUP35/AAAS	15
BP	GO:0009314	response to radiation	25/443	447/18866	6.10884e-05	0.000586198	0.000448584	MSH2/FIGNL1/CHEK1/XRCC2/CDC25A/HMGN1/RUVBL2/POLD1/XRCC5/FEN1/CHEK2/PCNA/TIPIN/CAMKMT/RFWD3/DTL/NPM1/PBK/RAD51/AURKB/BRCA1/BRAT1/USP28/TRIAP1/RAD54L	25
BP	GO:0010824	regulation of centrosome duplication	7/443	44/18866	6.78684e-05	0.000649035	0.000496669	XPO1/NUP62/GEN1/PLK4/NPM1/BRCA1/CEP131	7
BP	GO:0007143	female meiotic nuclear division	6/443	31/18866	7.24751e-05	0.000690732	0.000528578	TTK/FBXO5/AURKA/NCAPH/PLK1/MASTL	6
BP	GO:0002478	antigen processing and presentation of exogenous peptide antigen	14/443	177/18866	7.80229e-05	0.000741086	0.000567111	CENPE/KIF18A/KIF22/KIF11/KIF15/KIF2C/PSMD13/KIF4A/PSMD14/PSMA1/PSMD1/KIF23/KIF4B/PSMA2	14
BP	GO:0001832	blastocyst growth	5/443	20/18866	8.08405e-05	0.000765254	0.000585605	GINS1/NCAPG2/GINS4/ZNF830/CTR9	5
BP	GO:0035246	peptidyl-arginine N-methylation	4/443	11/18866	8.68245e-05	0.000819132	0.000626835	NDUFAF7/PRMT1/PRMT6/PRMT3	4
BP	GO:0000959	mitochondrial RNA metabolic process	7/443	46/18866	9.10424e-05	0.000856043	0.000655081	PNPT1/TFAM/DARS2/TBRG4/TEFM/TFB2M/LRPPRC	7
BP	GO:0034504	protein localization to nucleus	18/443	277/18866	0.000103866	0.000971979	0.0007438	HNRNPU/XPO1/CDK1/DKC1/NUP62/KPNB1/CCT8/CCT4/TARDBP/CSE1L/BARD1/PLK1/TMCO6/NUP88/NUP35/E2F3/RAN/NVL	18
BP	GO:0045943	positive regulation of transcription by RNA polymerase I	5/443	21/18866	0.000104066	0.000971979	0.0007438	NCL/WDR75/WDR43/NOL11/PIH1D1	5
BP	GO:0050685	positive regulation of mRNA processing	6/443	33/18866	0.000104778	0.000975374	0.000746398	RBMX/NCL/CCNB1/TRA2A/NUDT21/SNRNP70	6
BP	GO:0007569	cell aging	11/443	118/18866	0.000106076	0.000981561	0.000751133	PNPT1/CHEK1/BCL2L12/CDK1/FBXO5/NUP62/PRMT6/CHEK2/RSL1D1/NPM1/RBL1	11
BP	GO:0006110	regulation of glycolytic process	9/443	80/18866	0.000106143	0.000981561	0.000751133	NUP62/NUP43/NDC1/NUP37/NUP160/NUP88/RAE1/NUP35/AAAS	9
BP	GO:0007062	sister chromatid cohesion	8/443	63/18866	0.000108426	0.000999373	0.000764763	SFPQ/KIF22/SMC3/BUB1B/FEN1/CDCA5/BUB1/PLK1	8
BP	GO:0032784	regulation of DNA-templated transcription, elongation	7/443	48/18866	0.000120283	0.00110503	0.000845614	HNRNPU/HMGN1/WDR43/TCERG1/TSFM/THOC1/EZH2	7
BP	GO:0019884	antigen processing and presentation of exogenous antigen	14/443	185/18866	0.000125166	0.0011424	0.000874211	CENPE/KIF18A/KIF22/KIF11/KIF15/KIF2C/PSMD13/KIF4A/PSMD14/PSMA1/PSMD1/KIF23/KIF4B/PSMA2	14
BP	GO:2000045	regulation of G1/S transition of mitotic cell cycle	14/443	185/18866	0.000125166	0.0011424	0.000874211	CDK1/PRMT1/AURKA/CDC25C/KIF14/CCNB1/CHEK2/PCNA/CDK2/RFWD3/RBL1/EZH2/RPA2/TRIAP1	14
BP	GO:0000727	double-strand break repair via break-induced replication	4/443	12/18866	0.000127825	0.00115537	0.000884139	MCM6/CDC7/MCM4/GINS4	4
BP	GO:0051255	spindle midzone assembly	4/443	12/18866	0.000127825	0.00115537	0.000884139	KIF4A/AURKB/KIF23/KIF4B	4
BP	GO:2000105	positive regulation of DNA-dependent DNA replication	4/443	12/18866	0.000127825	0.00115537	0.000884139	CDC7/CDK2/CDT1/DBF4	4
BP	GO:0009266	response to temperature stimulus	16/443	233/18866	0.000132338	0.00119232	0.000912412	RPA3/NUP62/NUP43/PTGES3/NDC1/NUP37/HSPD1/HDAC2/NUP160/NUP88/RAE1/DNAJC2/NUP35/RPA2/TMEM135/AAAS	16
BP	GO:0007050	cell cycle arrest	16/443	234/18866	0.000139055	0.00124882	0.000955652	MSH2/PNPT1/KIF20B/CDK1/PRMT1/AURKA/TFAP4/CDC25C/CCNB1/TBRG4/CHEK2/PCNA/BARD1/CDK2/BRCA1/TRIAP1	16
BP	GO:0040001	establishment of mitotic spindle localization	6/443	35/18866	0.000147581	0.00132115	0.001011	NDC80/KPNB1/BCCIP/MAD2L1/SPDL1/PLK1	6
BP	GO:0051653	spindle localization	7/443	50/18866	0.000156722	0.00139852	0.00107021	NDC80/KPNB1/BCCIP/MAD2L1/SPDL1/PLK1/ASPM	7
BP	GO:0061982	meiosis I cell cycle process	11/443	124/18866	0.000165362	0.00147094	0.00112562	EME1/FBXO5/CDC25A/AURKA/NDC1/CDC25C/PSMD13/PLK1/RAD51/RAD54B/RAD54L	11
BP	GO:2000779	regulation of double-strand break repair	9/443	85/18866	0.000169982	0.00150725	0.00115341	FIGNL1/CHEK1/FUS/PARPBP/RMI2/RAD51/FANCB/RPA2/DEK	9
BP	GO:1903578	regulation of ATP metabolic process	11/443	125/18866	0.000177566	0.00156953	0.00120107	CDK1/NUP62/NUP43/NDC1/NUP37/CCNB1/NUP160/NUP88/RAE1/NUP35/AAAS	11
BP	GO:0043161	proteasome-mediated ubiquitin-dependent protein catabolic process	23/443	424/18866	0.000187089	0.0016485	0.00126151	XPO1/CDK1/UBE2C/FBXO5/BUB3/AURKA/HSPBP1/BUB1B/UCHL5/MAD2L1/KIF14/CCNB1/PSMD13/CDK2/PLK1/SKP2/PBK/PSMD14/AURKB/PSMA1/PSMD1/CDC23/PSMA2	23
BP	GO:0006890	retrograde vesicle-mediated transport, Golgi to endoplasmic reticulum	9/443	87/18866	0.000203203	0.00178487	0.00136586	CENPE/KIF18A/KIF22/KIF11/KIF15/KIF2C/KIF4A/KIF23/KIF4B	9
BP	GO:0051053	negative regulation of DNA metabolic process	11/443	127/18866	0.000204278	0.00178871	0.0013688	MSH2/HNRNPU/HNRNPC/PARPBP/PIF1/XRCC5/RMI2/HNRNPA1/THOC1/FANCB/DNAJC2	11
BP	GO:1904666	regulation of ubiquitin protein ligase activity	5/443	24/18866	0.000205103	0.00179034	0.00137004	UBE2C/FBXO5/MAD2L1/PLK1/MASTL	5
BP	GO:0048002	antigen processing and presentation of peptide antigen	14/443	194/18866	0.000206017	0.00179273	0.00137188	CENPE/KIF18A/KIF22/KIF11/KIF15/KIF2C/PSMD13/KIF4A/PSMD14/PSMA1/PSMD1/KIF23/KIF4B/PSMA2	14
BP	GO:0051302	regulation of cell division	13/443	171/18866	0.000207001	0.00179572	0.00137416	KIF20B/ORC6/NUP62/AURKA/PLK4/KIF14/PLK1/PRPF40A/RBL1/KIF20A/AURKB/KIF23/ASPM	13
BP	GO:0000018	regulation of DNA recombination	10/443	107/18866	0.000212464	0.00183742	0.00140607	MSH2/FIGNL1/CHEK1/FUS/PARPBP/RMI2/RAD51/THOC1/FANCB/RPA2	10
BP	GO:0072698	protein localization to microtubule cytoskeleton	7/443	53/18866	0.000227665	0.00196282	0.00150203	HNRNPU/KIF20B/TTK/NUP62/AURKA/CRIPT/CEP131	7
BP	GO:0071482	cellular response to light stimulus	11/443	129/18866	0.000234316	0.00201397	0.00154117	CHEK1/CDC25A/RUVBL2/POLD1/PCNA/CAMKMT/NPM1/PBK/AURKB/USP28/TRIAP1	11
BP	GO:0000054	ribosomal subunit export from nucleus	4/443	14/18866	0.000249015	0.00212079	0.00162292	XPO1/NPM1/NUP88/RAN	4
BP	GO:0033750	ribosome localization	4/443	14/18866	0.000249015	0.00212079	0.00162292	XPO1/NPM1/NUP88/RAN	4
BP	GO:0072425	signal transduction involved in G2 DNA damage checkpoint	4/443	14/18866	0.000249015	0.00212079	0.00162292	CHEK1/PLK1/DTL/BRCA1	4
BP	GO:0051785	positive regulation of nuclear division	8/443	71/18866	0.000252964	0.00214789	0.00164366	HNRNPU/UBE2C/NUP62/AURKA/CDCA5/CDT1/AURKB/CDC23	8
BP	GO:0043470	regulation of carbohydrate catabolic process	9/443	90/18866	0.000263027	0.00222659	0.00170388	NUP62/NUP43/NDC1/NUP37/NUP160/NUP88/RAE1/NUP35/AAAS	9
BP	GO:0018022	peptidyl-lysine methylation	11/443	132/18866	0.000286326	0.00241652	0.00184923	SUV39H2/METTL21A/DPY30/EED/PRMT6/CAMKMT/N6AMT1/EZH2/BRCA1/CTR9/PIH1D1	11
BP	GO:0019083	viral transcription	13/443	178/18866	0.000306585	0.00257974	0.00197412	NUP62/NUP43/TFAP4/NDC1/NUP37/TARDBP/DHX9/NUP160/RRP1B/NUP88/RAE1/NUP35/AAAS	13
BP	GO:0046822	regulation of nucleocytoplasmic transport	10/443	112/18866	0.000308468	0.00258781	0.0019803	XPO1/CDK1/NUP62/KHDRBS1/TARDBP/BARD1/DHX9/RBM27/RAN/AAAS	10
BP	GO:0000154	rRNA modification	6/443	40/18866	0.000316085	0.00264379	0.00202314	DKC1/GAR1/FDXACB1/TFB2M/EMG1/FBL	6
BP	GO:0018216	peptidyl-arginine methylation	4/443	15/18866	0.000333291	0.00276296	0.00211434	NDUFAF7/PRMT1/PRMT6/PRMT3	4
BP	GO:0071428	rRNA-containing ribonucleoprotein complex export from nucleus	4/443	15/18866	0.000333291	0.00276296	0.00211434	XPO1/NPM1/NUP88/RAN	4
BP	GO:1904874	positive regulation of telomerase RNA localization to Cajal body	4/443	15/18866	0.000333291	0.00276296	0.00211434	DKC1/RUVBL2/CCT8/CCT4	4
BP	GO:0044380	protein localization to cytoskeleton	7/443	57/18866	0.000360279	0.00297788	0.0022788	HNRNPU/KIF20B/TTK/NUP62/AURKA/CRIPT/CEP131	7
BP	GO:0070199	establishment of protein localization to chromosome	5/443	27/18866	0.000367616	0.00302959	0.00231837	DKC1/RUVBL2/CCT8/CCT4/PIH1D1	5
BP	GO:0031100	animal organ regeneration	8/443	75/18866	0.000369728	0.00303806	0.00232485	PNPT1/CDK1/AURKA/ATIC/PCNA/CCNA2/EZH2/TYMS	8
BP	GO:1902806	regulation of cell cycle G1/S phase transition	14/443	206/18866	0.000381034	0.0031218	0.00238894	CDK1/PRMT1/AURKA/CDC25C/KIF14/CCNB1/CHEK2/PCNA/CDK2/RFWD3/RBL1/EZH2/RPA2/TRIAP1	14
BP	GO:0097711	ciliary basal body-plasma membrane docking	9/443	95/18866	0.000394802	0.00322518	0.00246804	NEK2/CDK1/CEP152/PLK4/CEP57/PLK1/HAUS8/CEP78/CEP131	9
BP	GO:0034728	nucleosome organization	13/443	183/18866	0.000400542	0.00325202	0.00248858	MIS18A/NASP/HMGB2/CENPK/HJURP/CENPL/ANP32E/ITGB3BP/PTMA/ASF1B/CENPH/CHAF1B/NPM1	13
BP	GO:0043489	RNA stabilization	7/443	58/18866	0.00040157	0.00325202	0.00248858	HNRNPU/FUS/DKC1/HNRNPC/HNRNPD/TARDBP/DHX9	7
BP	GO:1902373	negative regulation of mRNA catabolic process	7/443	58/18866	0.00040157	0.00325202	0.00248858	HNRNPU/FUS/HNRNPC/HNRNPD/TARDBP/DHX9/DHX34	7
BP	GO:0060964	regulation of gene silencing by miRNA	10/443	116/18866	0.00040922	0.00330442	0.00252868	NUP62/NUP43/NDC1/NUP37/DHX9/NUP160/NUP88/RAE1/NUP35/AAAS	10
BP	GO:0006268	DNA unwinding involved in DNA replication	4/443	16/18866	0.000436183	0.00349434	0.00267402	MCM6/RECQL4/MCM4/RAD51	4
BP	GO:0031573	intra-S DNA damage checkpoint	4/443	16/18866	0.000436183	0.00349434	0.00267402	MSH2/EME1/CHEK2/TIPIN	4
BP	GO:0000470	maturation of LSU-rRNA	5/443	28/18866	0.000438975	0.00349434	0.00267402	RRP15/MRPL1/RSL1D1/GTPBP4/ZNHIT6	5
BP	GO:0006760	folic acid-containing compound metabolic process	5/443	28/18866	0.000438975	0.00349434	0.00267402	ATIC/SLC19A1/GART/DHFR/TYMS	5
BP	GO:0031440	regulation of mRNA 3'-end processing	5/443	28/18866	0.000438975	0.00349434	0.00267402	SNRPA/CCNB1/BARD1/NUDT21/CTR9	5
BP	GO:0040029	regulation of gene expression, epigenetic	14/443	209/18866	0.00044076	0.00349861	0.00267729	HNRNPU/CHEK1/TAF1A/HMGB1/DPY30/EED/HDAC2/MSL3P1/POLR1B/EZH2/LRIF1/BRCA1/PPHLN1/DEK	14
BP	GO:0043467	regulation of generation of precursor metabolites and energy	12/443	162/18866	0.00045563	0.00360642	0.00275979	PNPT1/CDK1/NUP62/NUP43/NDC1/NUP37/CCNB1/NUP160/NUP88/RAE1/NUP35/AAAS	12
BP	GO:1990823	response to leukemia inhibitory factor	9/443	97/18866	0.000460848	0.00362724	0.00277572	NCL/HNRNPU/SRSF3/CACYBP/SRSF7/XRCC5/EED/BCLAF1/NUP35	9
BP	GO:1990830	cellular response to leukemia inhibitory factor	9/443	97/18866	0.000460848	0.00362724	0.00277572	NCL/HNRNPU/SRSF3/CACYBP/SRSF7/XRCC5/EED/BCLAF1/NUP35	9
BP	GO:0007018	microtubule-based movement	20/443	368/18866	0.000472667	0.00370984	0.00283893	HNRNPU/KIF20B/CENPE/DNAAF5/SFPQ/KIF18A/KIF22/KPNB1/KIF11/KIF15/KIF2C/KIF14/KIF4A/KIF20A/KIFC1/TMEM201/KIF23/KIF4B/LRPPRC/CEP131	20
BP	GO:0060968	regulation of gene silencing	11/443	140/18866	0.000474632	0.00371485	0.00284277	NUP62/NUP43/NDC1/NUP37/CDK2/DHX9/NUP160/NUP88/RAE1/NUP35/AAAS	11
BP	GO:0010498	proteasomal protein catabolic process	24/443	483/18866	0.000492954	0.00384752	0.00294428	XPO1/CDK1/UBE2C/FBXO5/BUB3/AURKA/HSPBP1/BUB1B/UCHL5/MAD2L1/KIF14/CCNB1/NUDT15/PSMD13/CDK2/PLK1/SKP2/PBK/PSMD14/AURKB/PSMA1/PSMD1/CDC23/PSMA2	24
BP	GO:0019886	antigen processing and presentation of exogenous peptide antigen via MHC class II	9/443	99/18866	0.000535713	0.00414847	0.00317459	CENPE/KIF18A/KIF22/KIF11/KIF15/KIF2C/KIF4A/KIF23/KIF4B	9
BP	GO:0060147	regulation of posttranscriptional gene silencing	10/443	120/18866	0.000535955	0.00414847	0.00317459	NUP62/NUP43/NDC1/NUP37/DHX9/NUP160/NUP88/RAE1/NUP35/AAAS	10
BP	GO:0060966	regulation of gene silencing by RNA	10/443	120/18866	0.000535955	0.00414847	0.00317459	NUP62/NUP43/NDC1/NUP37/DHX9/NUP160/NUP88/RAE1/NUP35/AAAS	10
BP	GO:0006266	DNA ligation	4/443	17/18866	0.000559871	0.00428622	0.00328	HMGB2/HMGB1/LIG1/RAD51	4
BP	GO:0007096	regulation of exit from mitosis	4/443	17/18866	0.000559871	0.00428622	0.00328	UBE2C/KNTC1/CDCA5/CDC23	4
BP	GO:0042790	nucleolar large rRNA transcription by RNA polymerase I	4/443	17/18866	0.000559871	0.00428622	0.00328	NCL/TCOF1/NOL11/PIH1D1	4
BP	GO:2000001	regulation of DNA damage checkpoint	4/443	17/18866	0.000559871	0.00428622	0.00328	CHEK2/RFWD3/THOC1/RPA2	4
BP	GO:0016571	histone methylation	11/443	143/18866	0.00056787	0.00433562	0.0033178	SUV39H2/PRMT1/DPY30/EED/PRMT6/N6AMT1/EZH2/FBL/BRCA1/CTR9/PIH1D1	11
BP	GO:0010212	response to ionizing radiation	11/443	144/18866	0.000602156	0.00458489	0.00350856	MSH2/FIGNL1/XRCC2/XRCC5/CHEK2/RFWD3/RAD51/BRCA1/BRAT1/USP28/RAD54L	11
BP	GO:0042771	intrinsic apoptotic signaling pathway in response to DNA damage by p53 class mediator	6/443	45/18866	0.000607621	0.0046015	0.00352126	MSH2/BCL2L12/HNRNPK/CHEK2/USP28/TRIAP1	6
BP	GO:0051293	establishment of spindle localization	6/443	45/18866	0.000607621	0.0046015	0.00352126	NDC80/KPNB1/BCCIP/MAD2L1/SPDL1/PLK1	6
BP	GO:0000132	establishment of mitotic spindle orientation	5/443	30/18866	0.000612426	0.00462539	0.00353954	NDC80/BCCIP/MAD2L1/SPDL1/PLK1	5
BP	GO:0009451	RNA modification	12/443	168/18866	0.000631195	0.00475433	0.00363821	SSB/DKC1/GAR1/TPRKB/TRMT6/WDR4/FDXACB1/TFB2M/EMG1/TRUB1/FBL/TGS1	12
BP	GO:0006334	nucleosome assembly	11/443	145/18866	0.00063815	0.00479382	0.00366844	MIS18A/NASP/HMGB2/CENPK/HJURP/CENPL/ITGB3BP/ASF1B/CENPH/CHAF1B/NPM1	11
BP	GO:0000079	regulation of cyclin-dependent protein serine/threonine kinase activity	9/443	102/18866	0.000666464	0.00499313	0.00382096	CDC25A/TFAP4/BCCIP/CDC25C/CCNB1/CCNA2/PLK1/GTPBP4/CKS1B	9
BP	GO:0009200	deoxyribonucleoside triphosphate metabolic process	4/443	18/18866	0.000706564	0.00526541	0.00402932	NUDT15/DTYMK/NUDT1/TYMS	4
BP	GO:1904872	regulation of telomerase RNA localization to Cajal body	4/443	18/18866	0.000706564	0.00526541	0.00402932	DKC1/RUVBL2/CCT8/CCT4	4
BP	GO:0002495	antigen processing and presentation of peptide antigen via MHC class II	9/443	103/18866	0.000715433	0.00530944	0.00406301	CENPE/KIF18A/KIF22/KIF11/KIF15/KIF2C/KIF4A/KIF23/KIF4B	9
BP	GO:0006356	regulation of transcription by RNA polymerase I	5/443	31/18866	0.000716263	0.00530944	0.00406301	NCL/WDR75/WDR43/NOL11/PIH1D1	5
BP	GO:0031497	chromatin assembly	13/443	195/18866	0.000730224	0.00539865	0.00413128	MIS18A/NASP/HMGB2/CENPK/HJURP/CENPL/HELLS/ITGB3BP/ASF1B/CENPH/CHAF1B/NPM1/PPHLN1	13
BP	GO:0006333	chromatin assembly or disassembly	14/443	220/18866	0.000732858	0.00540202	0.00413386	MIS18A/NASP/HMGB2/SUV39H2/CENPK/HJURP/CENPL/HELLS/ITGB3BP/ASF1B/CENPH/CHAF1B/NPM1/PPHLN1	14
BP	GO:2001021	negative regulation of response to DNA damage stimulus	8/443	83/18866	0.000734536	0.00540202	0.00413386	BCL2L12/FBXO5/PARPBP/RMI2/CHEK2/THOC1/FANCB/TRIAP1	8
BP	GO:0002504	antigen processing and presentation of peptide or polysaccharide antigen via MHC class II	9/443	104/18866	0.000767298	0.00561878	0.00429973	CENPE/KIF18A/KIF22/KIF11/KIF15/KIF2C/KIF4A/KIF23/KIF4B	9
BP	GO:0006378	mRNA polyadenylation	6/443	47/18866	0.000770026	0.00561878	0.00429973	PNPT1/CPSF3/SNRPA/MTPAP/NUDT21/CTR9	6
BP	GO:0030261	chromosome condensation	6/443	47/18866	0.000770026	0.00561878	0.00429973	CDK1/NCAPG/NCAPG2/NCAPH/CCNB1/CDCA5	6
BP	GO:0000910	cytokinesis	12/443	172/18866	0.000777272	0.00565693	0.00432892	KIF20B/NUP62/AURKA/PLK4/KIF14/KIF4A/PLK1/PRPF40A/KIF20A/AURKB/KIF23/KIF4B	12
BP	GO:0097421	liver regeneration	5/443	32/18866	0.000832711	0.0060447	0.00462567	PNPT1/AURKA/PCNA/EZH2/TYMS	5
BP	GO:0000245	spliceosomal complex assembly	8/443	85/18866	0.000860515	0.0062304	0.00476777	SRSF1/RBMX/DDX1/GEMIN6/SRSF10/GCFC2/SNRPG/SNRPE	8
BP	GO:0043631	RNA polyadenylation	6/443	48/18866	0.000862846	0.00623117	0.00476836	PNPT1/CPSF3/SNRPA/MTPAP/NUDT21/CTR9	6
BP	GO:0046653	tetrahydrofolate metabolic process	4/443	19/18866	0.000878497	0.00625987	0.00479032	ATIC/GART/DHFR/TYMS	4
BP	GO:0090670	RNA localization to Cajal body	4/443	19/18866	0.000878497	0.00625987	0.00479032	DKC1/RUVBL2/CCT8/CCT4	4
BP	GO:0090671	telomerase RNA localization to Cajal body	4/443	19/18866	0.000878497	0.00625987	0.00479032	DKC1/RUVBL2/CCT8/CCT4	4
BP	GO:0090672	telomerase RNA localization	4/443	19/18866	0.000878497	0.00625987	0.00479032	DKC1/RUVBL2/CCT8/CCT4	4
BP	GO:0090685	RNA localization to nucleus	4/443	19/18866	0.000878497	0.00625987	0.00479032	DKC1/RUVBL2/CCT8/CCT4	4
BP	GO:1904029	regulation of cyclin-dependent protein kinase activity	9/443	106/18866	0.000880224	0.00625987	0.00479032	CDC25A/TFAP4/BCCIP/CDC25C/CCNB1/CCNA2/PLK1/GTPBP4/CKS1B	9
BP	GO:0017038	protein import	13/443	200/18866	0.000923162	0.00654861	0.00501128	CDK1/NUP62/TOMM40/KPNB1/TIMM50/HSPD1/TARDBP/CSE1L/TMCO6/NUP88/NUP35/E2F3/RAN	13
BP	GO:0048511	rhythmic process	17/443	305/18866	0.000934357	0.00661128	0.00505924	CBX3/HNRNPU/SUV39H2/CDK1/SFPQ/HNRNPR/HNRNPD/TARDBP/PCNA/DHX9/HDAC2/DTL/HNRNPL/EZH2/ZNF830/PSPC1/TYMS	17
BP	GO:0009303	rRNA transcription	5/443	33/18866	0.000962699	0.00679466	0.00519957	NCL/TCOF1/NOL11/POLR1B/PIH1D1	5
BP	GO:0009060	aerobic respiration	8/443	87/18866	0.00100327	0.00706321	0.00540507	NDUFA4/MDH1/FH/MTFR2/DLAT/SDHD/CYCS/SDHB	8
BP	GO:0032211	negative regulation of telomere maintenance via telomerase	4/443	20/18866	0.00107791	0.00756969	0.00579265	HNRNPU/HNRNPC/PIF1/HNRNPA1	4
BP	GO:0070125	mitochondrial translational elongation	8/443	88/18866	0.00108142	0.00757535	0.00579698	MRPS9/MRPL19/DAP3/MRPL32/MRPL1/TSFM/PTCD3/MRPL16	8
BP	GO:0006099	tricarboxylic acid cycle	5/443	34/18866	0.00110718	0.00771718	0.00590552	MDH1/FH/DLAT/SDHD/SDHB	5
BP	GO:0042558	pteridine-containing compound metabolic process	5/443	34/18866	0.00110718	0.00771718	0.00590552	ATIC/SLC19A1/GART/DHFR/TYMS	5
BP	GO:0046034	ATP metabolic process	17/443	311/18866	0.00115553	0.00803425	0.00614816	MSH2/FIGNL1/CDK1/NUP62/NUP43/NDUFA4/NDC1/NUP37/CCNB1/TEFM/NUP160/NUP88/RAE1/NUP35/SDHD/CYCS/AAAS	17
BP	GO:0006165	nucleoside diphosphate phosphorylation	10/443	133/18866	0.00119075	0.00825812	0.00631947	NUP62/NUP43/NDC1/NUP37/DTYMK/NUP160/NUP88/RAE1/NUP35/AAAS	10
BP	GO:0048255	mRNA stabilization	6/443	51/18866	0.00119363	0.00825812	0.00631947	HNRNPU/FUS/HNRNPC/HNRNPD/TARDBP/DHX9	6
BP	GO:0019882	antigen processing and presentation	14/443	232/18866	0.00122369	0.0084453	0.00646271	CENPE/KIF18A/KIF22/KIF11/KIF15/KIF2C/PSMD13/KIF4A/PSMD14/PSMA1/PSMD1/KIF23/KIF4B/PSMA2	14
BP	GO:0009262	deoxyribonucleotide metabolic process	5/443	35/18866	0.00126711	0.00872343	0.00667555	RRM2/NUDT15/DTYMK/NUDT1/TYMS	5
BP	GO:0006414	translational elongation	10/443	135/18866	0.00133349	0.00913555	0.00699092	MRPS9/MRPL19/DAP3/MRPL32/MRPL1/TSFM/PTCD3/DPH6/MRPL16/SRP9	10
BP	GO:0046939	nucleotide phosphorylation	10/443	135/18866	0.00133349	0.00913555	0.00699092	NUP62/NUP43/NDC1/NUP37/DTYMK/NUP160/NUP88/RAE1/NUP35/AAAS	10
BP	GO:0006188	IMP biosynthetic process	3/443	10/18866	0.00136461	0.00923581	0.00706764	ATIC/PAICS/GART	3
BP	GO:0009396	folic acid-containing compound biosynthetic process	3/443	10/18866	0.00136461	0.00923581	0.00706764	ATIC/GART/DHFR	3
BP	GO:0032070	regulation of deoxyribonuclease activity	3/443	10/18866	0.00136461	0.00923581	0.00706764	HMGB1/PCNA/NPM1	3
BP	GO:1901838	positive regulation of transcription of nucleolar large rRNA by RNA polymerase I	3/443	10/18866	0.00136461	0.00923581	0.00706764	NCL/NOL11/PIH1D1	3
BP	GO:1904851	positive regulation of establishment of protein localization to telomere	3/443	10/18866	0.00136461	0.00923581	0.00706764	DKC1/CCT8/CCT4	3
BP	GO:0032205	negative regulation of telomere maintenance	5/443	36/18866	0.00144348	0.00972265	0.00744019	HNRNPU/HNRNPC/PIF1/XRCC5/HNRNPA1	5
BP	GO:0051294	establishment of spindle orientation	5/443	36/18866	0.00144348	0.00972265	0.00744019	NDC80/BCCIP/MAD2L1/SPDL1/PLK1	5
BP	GO:0000281	mitotic cytokinesis	7/443	72/18866	0.00148574	0.0099833	0.00763965	KIF20B/NUP62/KIF4A/PLK1/KIF20A/KIF23/KIF4B	7
BP	GO:0007568	aging	17/443	319/18866	0.00151834	0.0101779	0.0077886	MSH2/PNPT1/CHEK1/BCL2L12/CDK1/CACYBP/FBXO5/NUP62/PRMT6/CHEK2/RSL1D1/NUDT1/NPM1/RBL1/AURKB/RAD54L/TYMS	17
BP	GO:0045132	meiotic chromosome segregation	8/443	93/18866	0.00154822	0.0103535	0.00792291	EME1/TTK/NUF2/BUB1B/NDC1/NCAPH/BUB1/PLK1	8
BP	GO:0006096	glycolytic process	9/443	115/18866	0.00156749	0.0103876	0.00794905	NUP62/NUP43/NDC1/NUP37/NUP160/NUP88/RAE1/NUP35/AAAS	9
BP	GO:0007063	regulation of sister chromatid cohesion	4/443	22/18866	0.00156815	0.0103876	0.00794905	SFPQ/FEN1/CDCA5/BUB1	4
BP	GO:0032069	regulation of nuclease activity	4/443	22/18866	0.00156815	0.0103876	0.00794905	HMGB2/HMGB1/PCNA/NPM1	4
BP	GO:0062033	positive regulation of mitotic sister chromatid segregation	4/443	22/18866	0.00156815	0.0103876	0.00794905	HNRNPU/CDT1/AURKB/CDC23	4
BP	GO:0006757	ATP generation from ADP	9/443	116/18866	0.00166491	0.0109767	0.00839983	NUP62/NUP43/NDC1/NUP37/NUP160/NUP88/RAE1/NUP35/AAAS	9
BP	GO:0034968	histone lysine methylation	9/443	116/18866	0.00166491	0.0109767	0.00839983	SUV39H2/DPY30/EED/PRMT6/N6AMT1/EZH2/BRCA1/CTR9/PIH1D1	9
BP	GO:0000491	small nucleolar ribonucleoprotein complex assembly	3/443	11/18866	0.00184377	0.0120145	0.00919405	RUVBL2/ZNHIT6/PIH1D1	3
BP	GO:0070203	regulation of establishment of protein localization to telomere	3/443	11/18866	0.00184377	0.0120145	0.00919405	DKC1/CCT8/CCT4	3
BP	GO:1904869	regulation of protein localization to Cajal body	3/443	11/18866	0.00184377	0.0120145	0.00919405	DKC1/CCT8/CCT4	3
BP	GO:1904871	positive regulation of protein localization to Cajal body	3/443	11/18866	0.00184377	0.0120145	0.00919405	DKC1/CCT8/CCT4	3
BP	GO:2000615	regulation of histone H3-K9 acetylation	3/443	11/18866	0.00184377	0.0120145	0.00919405	CHEK1/BRCA1/PIH1D1	3
BP	GO:0046599	regulation of centriole replication	4/443	23/18866	0.00186344	0.0120865	0.00924909	NUP62/PLK4/NPM1/BRCA1	4
BP	GO:0048026	positive regulation of mRNA splicing, via spliceosome	4/443	23/18866	0.00186344	0.0120865	0.00924909	RBMX/NCL/TRA2A/SNRNP70	4
BP	GO:0042274	ribosomal small subunit biogenesis	7/443	75/18866	0.0018853	0.0122	0.00933597	UTP6/NOL10/XRCC5/NPM1/NOL11/EMG1/LSM6	7
BP	GO:0007292	female gamete generation	10/443	142/18866	0.00194672	0.0125684	0.00961791	TTK/FBXO5/AURKA/MCM8/NCAPH/CCNB1/PLK1/MASTL/ZNF830/ASPM	10
BP	GO:0007127	meiosis I	9/443	119/18866	0.00198663	0.0127966	0.00979254	EME1/FBXO5/AURKA/NDC1/PSMD13/PLK1/RAD51/RAD54B/RAD54L	9
BP	GO:0032506	cytokinetic process	5/443	39/18866	0.0020812	0.0133444	0.0102117	KIF20B/NUP62/KIF20A/AURKB/KIF23	5
BP	GO:2000279	negative regulation of DNA biosynthetic process	5/443	39/18866	0.0020812	0.0133444	0.0102117	HNRNPU/HNRNPC/PIF1/HNRNPA1/DNAJC2	5
BP	GO:0045292	mRNA cis splicing, via spliceosome	6/443	57/18866	0.0021375	0.0136742	0.0104641	SRSF1/SRSF3/SRSF7/SRSF2/SRSF10/PRPF40A	6
BP	GO:0002218	activation of innate immune response	10/443	144/18866	0.00215847	0.0137768	0.0105426	SFPQ/HMGB1/XRCC5/ZCCHC3/PSMD13/PSMD14/PSMA1/PSMD1/PSMA2/PSPC1	10
BP	GO:1900542	regulation of purine nucleotide metabolic process	9/443	121/18866	0.00222736	0.0141842	0.0108544	NUP62/NUP43/NDC1/NUP37/NUP160/NUP88/RAE1/NUP35/AAAS	9
BP	GO:0032467	positive regulation of cytokinesis	5/443	40/18866	0.00233336	0.0148256	0.0113452	KIF20B/NUP62/KIF14/AURKB/KIF23	5
BP	GO:0007077	mitotic nuclear envelope disassembly	3/443	12/18866	0.00241576	0.0151431	0.0115881	CDK1/CCNB1/PLK1	3
BP	GO:0035404	histone-serine phosphorylation	3/443	12/18866	0.00241576	0.0151431	0.0115881	AURKA/CCNB1/AURKB	3
BP	GO:0070202	regulation of establishment of protein localization to chromosome	3/443	12/18866	0.00241576	0.0151431	0.0115881	DKC1/CCT8/CCT4	3
BP	GO:1903405	protein localization to nuclear body	3/443	12/18866	0.00241576	0.0151431	0.0115881	DKC1/CCT8/CCT4	3
BP	GO:1904816	positive regulation of protein localization to chromosome, telomeric region	3/443	12/18866	0.00241576	0.0151431	0.0115881	DKC1/CCT8/CCT4	3
BP	GO:1904867	protein localization to Cajal body	3/443	12/18866	0.00241576	0.0151431	0.0115881	DKC1/CCT8/CCT4	3
BP	GO:0061640	cytoskeleton-dependent cytokinesis	8/443	100/18866	0.00245525	0.0153563	0.0117513	KIF20B/NUP62/KIF4A/PLK1/KIF20A/AURKB/KIF23/KIF4B	8
BP	GO:0006140	regulation of nucleotide metabolic process	9/443	123/18866	0.00249074	0.0155436	0.0118946	NUP62/NUP43/NDC1/NUP37/NUP160/NUP88/RAE1/NUP35/AAAS	9
BP	GO:0006446	regulation of translational initiation	7/443	79/18866	0.00254203	0.0158284	0.0121126	MTIF2/DDX1/EIF3B/EIF2AK1/KHDRBS1/NPM1/EIF5B	7
BP	GO:0046031	ADP metabolic process	9/443	124/18866	0.00263139	0.0163485	0.0125105	NUP62/NUP43/NDC1/NUP37/NUP160/NUP88/RAE1/NUP35/AAAS	9
BP	GO:1900182	positive regulation of protein localization to nucleus	7/443	80/18866	0.00273077	0.0169283	0.0129543	CDK1/DKC1/CCT8/CCT4/TARDBP/PLK1/RAN	7
BP	GO:0051098	regulation of binding	18/443	367/18866	0.00277191	0.0171455	0.0131204	HMGB2/NEK2/HJURP/AURKA/RUVBL2/TFAP4/HMGB1/GMNN/CDCA5/DHX9/PLK1/HDAC2/GTPBP4/CDT1/HNRNPL/AURKB/RAN/NVL	18
BP	GO:0006606	protein import into nucleus	10/443	150/18866	0.0029071	0.017942	0.01373	CDK1/NUP62/KPNB1/TARDBP/CSE1L/TMCO6/NUP88/NUP35/E2F3/RAN	10
BP	GO:0016579	protein deubiquitination	15/443	283/18866	0.00296007	0.0182288	0.0139495	CDK1/CDC25A/UCHL5/CLSPN/PSMD13/USP42/BARD1/CCNA2/SKP2/PSMD14/PSMA1/PSMD1/BRCA1/PSMA2/USP28	15
BP	GO:0070129	regulation of mitochondrial translation	4/443	26/18866	0.00297622	0.0182881	0.0139948	MALSU1/RMND1/TSFM/LRPPRC	4
BP	GO:0019058	viral life cycle	17/443	341/18866	0.00304283	0.0186565	0.0142768	XPO1/CDK1/NUP62/PPIH/NUP43/KPNB1/ILF3/NDC1/NUP37/NUP160/NUP88/RAE1/NUP35/PPIA/RAN/AAAS/DEK	17
BP	GO:0000212	meiotic spindle organization	3/443	13/18866	0.00308612	0.0186683	0.0142858	FBXO5/AURKA/ASPM	3
BP	GO:0001833	inner cell mass cell proliferation	3/443	13/18866	0.00308612	0.0186683	0.0142858	GINS1/NCAPG2/GINS4	3
BP	GO:0031126	snoRNA 3'-end processing	3/443	13/18866	0.00308612	0.0186683	0.0142858	DKC1/EXOSC2/FBL	3
BP	GO:0034244	negative regulation of transcription elongation from RNA polymerase II promoter	3/443	13/18866	0.00308612	0.0186683	0.0142858	HNRNPU/TCERG1/EZH2	3
BP	GO:0043970	histone H3-K9 acetylation	3/443	13/18866	0.00308612	0.0186683	0.0142858	CHEK1/BRCA1/PIH1D1	3
BP	GO:0046040	IMP metabolic process	3/443	13/18866	0.00308612	0.0186683	0.0142858	ATIC/PAICS/GART	3
BP	GO:1900180	regulation of protein localization to nucleus	9/443	127/18866	0.0030914	0.0186683	0.0142858	CDK1/DKC1/NUP62/CCT8/CCT4/TARDBP/PLK1/RAN/NVL	9
BP	GO:0006090	pyruvate metabolic process	10/443	152/18866	0.00319821	0.0192718	0.0147476	NUP62/NUP43/NDC1/NUP37/NUP160/NUP88/DLAT/RAE1/NUP35/AAAS	10
BP	GO:0006415	translational termination	8/443	105/18866	0.00332535	0.0199949	0.015301	MRPS9/MRPL19/DAP3/MRPL32/MRPL1/PTCD3/MRPL16/N6AMT1	8
BP	GO:0018195	peptidyl-arginine modification	4/443	27/18866	0.00342989	0.0204916	0.015681	NDUFAF7/PRMT1/PRMT6/PRMT3	4
BP	GO:0034243	regulation of transcription elongation from RNA polymerase II promoter	4/443	27/18866	0.00342989	0.0204916	0.015681	HNRNPU/WDR43/TCERG1/EZH2	4
BP	GO:1904357	negative regulation of telomere maintenance via telomere lengthening	4/443	27/18866	0.00342989	0.0204916	0.015681	HNRNPU/HNRNPC/PIF1/HNRNPA1	4
BP	GO:0045910	negative regulation of DNA recombination	5/443	44/18866	0.00356729	0.0212671	0.0162745	MSH2/PARPBP/RMI2/THOC1/FANCB	5
BP	GO:0001510	RNA methylation	7/443	84/18866	0.00359522	0.0213881	0.0163671	TRMT6/WDR4/FDXACB1/TFB2M/EMG1/FBL/TGS1	7
BP	GO:0008033	tRNA processing	9/443	130/18866	0.00361259	0.0214459	0.0164114	SSB/DDX1/FAM98B/TPRKB/RPP30/TRMT6/WDR4/TRUB1/LSM6	9
BP	GO:0009132	nucleoside diphosphate metabolic process	10/443	155/18866	0.00367792	0.0217876	0.0166728	NUP62/NUP43/NDC1/NUP37/DTYMK/NUP160/NUP88/RAE1/NUP35/AAAS	10
BP	GO:0009416	response to light stimulus	16/443	319/18866	0.00375398	0.0221912	0.0169817	MSH2/CHEK1/CDC25A/HMGN1/RUVBL2/POLD1/FEN1/PCNA/TIPIN/CAMKMT/DTL/NPM1/PBK/AURKB/USP28/TRIAP1	16
BP	GO:0007135	meiosis II	3/443	14/18866	0.00385988	0.022532	0.0172425	BUB1B/BUB1/MASTL	3
BP	GO:0061983	meiosis II cell cycle process	3/443	14/18866	0.00385988	0.022532	0.0172425	BUB1B/BUB1/MASTL	3
BP	GO:1901836	regulation of transcription of nucleolar large rRNA by RNA polymerase I	3/443	14/18866	0.00385988	0.022532	0.0172425	NCL/NOL11/PIH1D1	3
BP	GO:1904668	positive regulation of ubiquitin protein ligase activity	3/443	14/18866	0.00385988	0.022532	0.0172425	UBE2C/PLK1/MASTL	3
BP	GO:1904814	regulation of protein localization to chromosome, telomeric region	3/443	14/18866	0.00385988	0.022532	0.0172425	DKC1/CCT8/CCT4	3
BP	GO:1990173	protein localization to nucleoplasm	3/443	14/18866	0.00385988	0.022532	0.0172425	DKC1/CCT8/CCT4	3
BP	GO:0010458	exit from mitosis	4/443	28/18866	0.00392838	0.0228368	0.0174757	UBE2C/KNTC1/CDCA5/CDC23	4
BP	GO:0031167	rRNA methylation	4/443	28/18866	0.00392838	0.0228368	0.0174757	FDXACB1/TFB2M/EMG1/FBL	4
BP	GO:0006418	tRNA aminoacylation for protein translation	5/443	45/18866	0.00393725	0.022841	0.0174789	NARS2/DARS2/FARSB/AIMP1/IARS2	5
BP	GO:0006997	nucleus organization	9/443	133/18866	0.00420035	0.0243169	0.0186084	HMGB2/CDK1/NDC1/CCNB1/TARDBP/PLK1/NUP35/EMG1/POLR1B	9
BP	GO:0006368	transcription elongation from RNA polymerase II promoter	7/443	87/18866	0.00436941	0.0252435	0.0193174	HNRNPU/WDR43/TCERG1/GTF2H3/SSRP1/EZH2/CTR9	7
BP	GO:0051569	regulation of histone H3-K4 methylation	4/443	29/18866	0.00447367	0.0257102	0.0196746	PRMT6/BRCA1/CTR9/PIH1D1	4
BP	GO:0002562	somatic diversification of immune receptors via germline recombination within a single locus	6/443	66/18866	0.0044869	0.0257102	0.0196746	MSH2/HMGB2/HMGB1/HSPD1/THOC1/EXO1	6
BP	GO:0016444	somatic cell DNA recombination	6/443	66/18866	0.0044869	0.0257102	0.0196746	MSH2/HMGB2/HMGB1/HSPD1/THOC1/EXO1	6
BP	GO:0046824	positive regulation of nucleocytoplasmic transport	6/443	66/18866	0.0044869	0.0257102	0.0196746	CDK1/KHDRBS1/TARDBP/DHX9/RBM27/RAN	6
BP	GO:0045089	positive regulation of innate immune response	12/443	213/18866	0.00464288	0.0265497	0.020317	HMGB2/SFPQ/HMGB1/XRCC5/ZCCHC3/PSMD13/DHX9/PSMD14/PSMA1/PSMD1/PSMA2/PSPC1	12
BP	GO:0001325	formation of extrachromosomal circular DNA	3/443	15/18866	0.00474152	0.0266247	0.0203744	DNA2/XRCC5/EXO1	3
BP	GO:0019081	viral translation	3/443	15/18866	0.00474152	0.0266247	0.0203744	SSB/EIF3B/DHX9	3
BP	GO:0032785	negative regulation of DNA-templated transcription, elongation	3/443	15/18866	0.00474152	0.0266247	0.0203744	HNRNPU/TCERG1/EZH2	3
BP	GO:0042559	pteridine-containing compound biosynthetic process	3/443	15/18866	0.00474152	0.0266247	0.0203744	ATIC/GART/DHFR	3
BP	GO:0043144	snoRNA processing	3/443	15/18866	0.00474152	0.0266247	0.0203744	DKC1/EXOSC2/FBL	3
BP	GO:0046606	negative regulation of centrosome cycle	3/443	15/18866	0.00474152	0.0266247	0.0203744	NEK2/NPM1/BRCA1	3
BP	GO:0051290	protein heterotetramerization	3/443	15/18866	0.00474152	0.0266247	0.0203744	FARSB/RRM2/NUDT21	3
BP	GO:0090656	t-circle formation	3/443	15/18866	0.00474152	0.0266247	0.0203744	DNA2/XRCC5/EXO1	3
BP	GO:0090737	telomere maintenance via telomere trimming	3/443	15/18866	0.00474152	0.0266247	0.0203744	DNA2/XRCC5/EXO1	3
BP	GO:0045333	cellular respiration	11/443	187/18866	0.00478976	0.0268418	0.0205405	PNPT1/CDK1/NDUFA4/MDH1/CCNB1/FH/MTFR2/DLAT/SDHD/CYCS/SDHB	11
BP	GO:0009135	purine nucleoside diphosphate metabolic process	9/443	136/18866	0.00486025	0.0271283	0.0207598	NUP62/NUP43/NDC1/NUP37/NUP160/NUP88/RAE1/NUP35/AAAS	9
BP	GO:0009179	purine ribonucleoside diphosphate metabolic process	9/443	136/18866	0.00486025	0.0271283	0.0207598	NUP62/NUP43/NDC1/NUP37/NUP160/NUP88/RAE1/NUP35/AAAS	9
BP	GO:1903320	regulation of protein modification by small protein conjugation or removal	13/443	242/18866	0.004897	0.0272791	0.0208752	UBE2C/FBXO5/HSPBP1/MAD2L1/PLK1/SKP2/SAE1/GTPBP4/UBA2/MASTL/PRMT3/BRCA1/CTR9	13
BP	GO:0070126	mitochondrial translational termination	7/443	89/18866	0.00495142	0.0275275	0.0210652	MRPS9/MRPL19/DAP3/MRPL32/MRPL1/PTCD3/MRPL16	7
BP	GO:0062125	regulation of mitochondrial gene expression	4/443	30/18866	0.00506771	0.0280366	0.0214548	MALSU1/RMND1/TSFM/LRPPRC	4
BP	GO:0070198	protein localization to chromosome, telomeric region	4/443	30/18866	0.00506771	0.0280366	0.0214548	DKC1/CCT8/CCT4/XRCC5	4
BP	GO:0070646	protein modification by small protein removal	15/443	300/18866	0.00507301	0.0280366	0.0214548	CDK1/CDC25A/UCHL5/CLSPN/PSMD13/USP42/BARD1/CCNA2/SKP2/PSMD14/PSMA1/PSMD1/BRCA1/PSMA2/USP28	15
BP	GO:0043039	tRNA aminoacylation	5/443	48/18866	0.00521106	0.0287429	0.0219953	NARS2/DARS2/FARSB/AIMP1/IARS2	5
BP	GO:0007623	circadian rhythm	12/443	218/18866	0.00556936	0.0306588	0.0234614	HNRNPU/SUV39H2/CDK1/SFPQ/HNRNPR/HNRNPD/TARDBP/HDAC2/HNRNPL/EZH2/PSPC1/TYMS	12
BP	GO:0009185	ribonucleoside diphosphate metabolic process	9/443	139/18866	0.005598	0.0307561	0.0235359	NUP62/NUP43/NDC1/NUP37/NUP160/NUP88/RAE1/NUP35/AAAS	9
BP	GO:0042398	cellular modified amino acid biosynthetic process	5/443	49/18866	0.00569368	0.0308438	0.023603	GGCT/ATIC/GART/CHAC2/DHFR	5
BP	GO:0043038	amino acid activation	5/443	49/18866	0.00569368	0.0308438	0.023603	NARS2/DARS2/FARSB/AIMP1/IARS2	5
BP	GO:0009394	2'-deoxyribonucleotide metabolic process	4/443	31/18866	0.00571237	0.0308438	0.023603	NUDT15/DTYMK/NUDT1/TYMS	4
BP	GO:0006390	mitochondrial transcription	3/443	16/18866	0.00573506	0.0308438	0.023603	TFAM/TEFM/TFB2M	3
BP	GO:0007076	mitotic chromosome condensation	3/443	16/18866	0.00573506	0.0308438	0.023603	NCAPG/NCAPH/CDCA5	3
BP	GO:0009263	deoxyribonucleotide biosynthetic process	3/443	16/18866	0.00573506	0.0308438	0.023603	RRM2/DTYMK/TYMS	3
BP	GO:0030397	membrane disassembly	3/443	16/18866	0.00573506	0.0308438	0.023603	CDK1/CCNB1/PLK1	3
BP	GO:0046831	regulation of RNA export from nucleus	3/443	16/18866	0.00573506	0.0308438	0.023603	KHDRBS1/DHX9/RBM27	3
BP	GO:0051081	nuclear envelope disassembly	3/443	16/18866	0.00573506	0.0308438	0.023603	CDK1/CCNB1/PLK1	3
BP	GO:0071732	cellular response to nitric oxide	3/443	16/18866	0.00573506	0.0308438	0.023603	HNRNPD/CDK2/CCNA2	3
BP	GO:0090069	regulation of ribosome biogenesis	3/443	16/18866	0.00573506	0.0308438	0.023603	WDR75/WDR43/MALSU1	3
BP	GO:1903322	positive regulation of protein modification by small protein conjugation or removal	9/443	141/18866	0.00613597	0.0329368	0.0252046	UBE2C/HSPBP1/PLK1/SKP2/SAE1/UBA2/MASTL/BRCA1/CTR9	9
BP	GO:0031146	SCF-dependent proteasomal ubiquitin-dependent protein catabolic process	7/443	93/18866	0.00628808	0.0336887	0.02578	KIF14/PSMD13/SKP2/PSMD14/PSMA1/PSMD1/PSMA2	7
BP	GO:0010165	response to X-ray	4/443	32/18866	0.00640946	0.0342377	0.0262001	MSH2/XRCC2/XRCC5/RAD51	4
BP	GO:0045739	positive regulation of DNA repair	6/443	71/18866	0.00641498	0.0342377	0.0262001	FUS/HMGB1/PCNA/DHX9/FANCB/BRCA1	6
BP	GO:1902275	regulation of chromatin organization	11/443	195/18866	0.00651872	0.0347252	0.0265732	HNRNPU/CHEK1/RUVBL2/CCNB1/EED/PRMT6/SSRP1/BRCA1/PPHLN1/CTR9/PIH1D1	11
BP	GO:0002833	positive regulation of response to biotic stimulus	13/443	251/18866	0.00660304	0.0351076	0.0268659	HMGB2/SFPQ/HMGB1/XRCC5/HSPD1/ZCCHC3/PSMD13/DHX9/PSMD14/PSMA1/PSMD1/PSMA2/PSPC1	13
BP	GO:0043628	ncRNA 3'-end processing	5/443	51/18866	0.00675188	0.0357779	0.0273788	SSB/DKC1/EXOSC9/EXOSC2/FBL	5
BP	GO:0006978	DNA damage response, signal transduction by p53 class mediator resulting in transcription of p21 class mediator	3/443	17/18866	0.00684403	0.0357779	0.0273788	TFAP4/CHEK2/BRCA1	3
BP	GO:0009048	dosage compensation by inactivation of X chromosome	3/443	17/18866	0.00684403	0.0357779	0.0273788	HNRNPU/LRIF1/BRCA1	3
BP	GO:0016074	snoRNA metabolic process	3/443	17/18866	0.00684403	0.0357779	0.0273788	DKC1/EXOSC2/FBL	3
BP	GO:0051382	kinetochore assembly	3/443	17/18866	0.00684403	0.0357779	0.0273788	CENPK/CENPE/CENPH	3
BP	GO:1900363	regulation of mRNA polyadenylation	3/443	17/18866	0.00684403	0.0357779	0.0273788	SNRPA/NUDT21/CTR9	3
BP	GO:1901673	regulation of mitotic spindle assembly	3/443	17/18866	0.00684403	0.0357779	0.0273788	HNRNPU/RCC1/PLK1	3
BP	GO:1904355	positive regulation of telomere capping	3/443	17/18866	0.00684403	0.0357779	0.0273788	NEK2/HNRNPD/AURKB	3
BP	GO:2001267	regulation of cysteine-type endopeptidase activity involved in apoptotic signaling pathway	3/443	17/18866	0.00684403	0.0357779	0.0273788	TFAP4/NLE1/PIH1D1	3
BP	GO:0034614	cellular response to reactive oxygen species	10/443	170/18866	0.00699429	0.0364954	0.0279278	CDK1/HNRNPD/PPP5C/PCNA/CDK2/CCNA2/HDAC2/DHFR/EZH2/PRDX3	10
BP	GO:0019692	deoxyribose phosphate metabolic process	4/443	33/18866	0.00716074	0.0372252	0.0284863	NUDT15/DTYMK/NUDT1/TYMS	4
BP	GO:0043928	exonucleolytic catabolism of deadenylated mRNA	4/443	33/18866	0.00716074	0.0372252	0.0284863	LSM5/EXOSC9/EXOSC2/LSM6	4
BP	GO:0140056	organelle localization by membrane tethering	10/443	171/18866	0.00727822	0.0377659	0.0289001	NEK2/CDK1/CEP152/VPS33A/PLK4/CEP57/PLK1/HAUS8/CEP78/CEP131	10
BP	GO:0051445	regulation of meiotic cell cycle	5/443	52/18866	0.00732942	0.0379613	0.0290496	TTK/FBXO5/CDC25A/CDC25C/ASPM	5
BP	GO:2000772	regulation of cellular senescence	5/443	53/18866	0.00794052	0.0410505	0.0314136	PNPT1/BCL2L12/FBXO5/RSL1D1/RBL1	5
BP	GO:0001522	pseudouridine synthesis	3/443	18/18866	0.00807152	0.0412708	0.0315822	DKC1/GAR1/TRUB1	3
BP	GO:0035372	protein localization to microtubule	3/443	18/18866	0.00807152	0.0412708	0.0315822	HNRNPU/KIF20B/CRIPT	3
BP	GO:0042772	DNA damage response, signal transduction resulting in transcription	3/443	18/18866	0.00807152	0.0412708	0.0315822	TFAP4/CHEK2/BRCA1	3
BP	GO:0051782	negative regulation of cell division	3/443	18/18866	0.00807152	0.0412708	0.0315822	ORC6/AURKB/ASPM	3
BP	GO:0070200	establishment of protein localization to telomere	3/443	18/18866	0.00807152	0.0412708	0.0315822	DKC1/CCT8/CCT4	3
BP	GO:1902165	regulation of intrinsic apoptotic signaling pathway in response to DNA damage by p53 class mediator	3/443	18/18866	0.00807152	0.0412708	0.0315822	BCL2L12/HNRNPK/TRIAP1	3
BP	GO:1901983	regulation of protein acetylation	6/443	75/18866	0.00834329	0.0425827	0.0325861	CHEK1/RUVBL2/HDAC2/BRCA1/PIH1D1/FAM161A	6
BP	GO:0006457	protein folding	12/443	230/18866	0.00839641	0.0427759	0.0327339	PPIH/RUVBL2/HSPBP1/CCT8/PTGES3/PFDN4/CCT4/HSPD1/DNAJC2/PPIA/SNRNP70/NUDC	12
BP	GO:0051438	regulation of ubiquitin-protein transferase activity	5/443	54/18866	0.00858612	0.043663	0.0334128	UBE2C/FBXO5/MAD2L1/PLK1/MASTL	5
BP	GO:0000291	nuclear-transcribed mRNA catabolic process, exonucleolytic	4/443	35/18866	0.0088325	0.0448345	0.0343093	LSM5/EXOSC9/EXOSC2/LSM6	4
BP	GO:0051101	regulation of DNA binding	8/443	124/18866	0.00895905	0.0453947	0.0347379	HMGB2/NEK2/HJURP/TFAP4/HMGB1/CDCA5/HDAC2/CDT1	8
BP	GO:0007549	dosage compensation	3/443	19/18866	0.00942022	0.04728	0.0361807	HNRNPU/LRIF1/BRCA1	3
BP	GO:0032239	regulation of nucleobase-containing compound transport	3/443	19/18866	0.00942022	0.04728	0.0361807	KHDRBS1/DHX9/RBM27	3
BP	GO:1902170	cellular response to reactive nitrogen species	3/443	19/18866	0.00942022	0.04728	0.0361807	HNRNPD/CDK2/CCNA2	3
BP	GO:2000042	negative regulation of double-strand break repair via homologous recombination	3/443	19/18866	0.00942022	0.04728	0.0361807	PARPBP/RMI2/FANCB	3
BP	GO:2000757	negative regulation of peptidyl-lysine acetylation	3/443	19/18866	0.00942022	0.04728	0.0361807	HDAC2/BRCA1/PIH1D1	3
BP	GO:0002200	somatic diversification of immune receptors	6/443	77/18866	0.00944925	0.04728	0.0361807	MSH2/HMGB2/HMGB1/HSPD1/THOC1/EXO1	6
BP	GO:0006342	chromatin silencing	6/443	77/18866	0.00944925	0.04728	0.0361807	HMGB1/DPY30/EED/HDAC2/MSL3P1/EZH2	6
BP	GO:0000302	response to reactive oxygen species	12/443	235/18866	0.00986199	0.0492572	0.0376937	CDK1/HNRNPD/HSPD1/PPP5C/NUDT15/PCNA/CDK2/CCNA2/HDAC2/DHFR/EZH2/PRDX3	12
BP	GO:0072332	intrinsic apoptotic signaling pathway by p53 class mediator	6/443	78/18866	0.0100397	0.0500557	0.0383048	MSH2/BCL2L12/HNRNPK/CHEK2/USP28/TRIAP1	6
BP	GO:0022406	membrane docking	10/443	180/18866	0.0102523	0.0510249	0.0390465	NEK2/CDK1/CEP152/VPS33A/PLK4/CEP57/PLK1/HAUS8/CEP78/CEP131	10
BP	GO:0090398	cellular senescence	6/443	79/18866	0.010656	0.0529398	0.0405118	PNPT1/BCL2L12/FBXO5/PRMT6/RSL1D1/RBL1	6
BP	GO:0051568	histone H3-K4 methylation	5/443	57/18866	0.010739	0.0531698	0.0406878	DPY30/PRMT6/BRCA1/CTR9/PIH1D1	5
BP	GO:0033120	positive regulation of RNA splicing	4/443	37/18866	0.0107402	0.0531698	0.0406878	RBMX/NCL/TRA2A/SNRNP70	4
BP	GO:0008630	intrinsic apoptotic signaling pathway in response to DNA damage	7/443	103/18866	0.0107892	0.0533181	0.0408013	MSH2/BCL2L12/HNRNPK/CHEK2/BRCA1/USP28/TRIAP1	7
BP	GO:0009168	purine ribonucleoside monophosphate biosynthetic process	3/443	20/18866	0.0108924	0.0536388	0.0410467	ATIC/PAICS/GART	3
BP	GO:0071731	response to nitric oxide	3/443	20/18866	0.0108924	0.0536388	0.0410467	HNRNPD/CDK2/CCNA2	3
BP	GO:0031396	regulation of protein ubiquitination	11/443	211/18866	0.011415	0.0561135	0.0429405	UBE2C/FBXO5/HSPBP1/MAD2L1/PLK1/SKP2/GTPBP4/MASTL/PRMT3/BRCA1/CTR9	11
BP	GO:0034401	chromatin organization involved in regulation of transcription	9/443	156/18866	0.0115365	0.0566118	0.0433218	CHEK1/HELLS/HMGB1/DPY30/EED/HDAC2/MSL3P1/EZH2/PPHLN1	9
BP	GO:0006361	transcription initiation from RNA polymerase I promoter	4/443	38/18866	0.0117862	0.0576351	0.0441049	TAF1A/GTF2H3/POLR1B/PIH1D1	4
BP	GO:0071392	cellular response to estradiol stimulus	4/443	38/18866	0.0117862	0.0576351	0.0441049	KIF18A/RUVBL2/HNRNPD/CCNA2	4
BP	GO:0062012	regulation of small molecule metabolic process	19/443	456/18866	0.0118205	0.0577024	0.0441563	NUP62/NUP43/KPNB1/NDC1/NUP37/PSMD13/NUP160/PSMD14/NUP88/RAE1/PSMA1/NUP35/PSMD1/BRCA1/RAN/DUSP12/PSMA2/GGPS1/AAAS	19
BP	GO:2001022	positive regulation of response to DNA damage stimulus	7/443	105/18866	0.0119142	0.0580584	0.0444287	FUS/HMGB1/PCNA/DHX9/BCLAF1/FANCB/BRCA1	7
BP	GO:0071214	cellular response to abiotic stimulus	15/443	331/18866	0.0119659	0.0581084	0.044467	FIGNL1/CHEK1/CDC25A/RUVBL2/POLD1/XRCC5/CHEK2/PCNA/CAMKMT/NPM1/PBK/RAD51/AURKB/USP28/TRIAP1	15
BP	GO:0104004	cellular response to environmental stimulus	15/443	331/18866	0.0119659	0.0581084	0.044467	FIGNL1/CHEK1/CDC25A/RUVBL2/POLD1/XRCC5/CHEK2/PCNA/CAMKMT/NPM1/PBK/RAD51/AURKB/USP28/TRIAP1	15
BP	GO:0006293	nucleotide-excision repair, preincision complex stabilization	3/443	21/18866	0.0124899	0.0602159	0.0460798	RPA3/GTF2H3/RPA2	3
BP	GO:0006295	nucleotide-excision repair, DNA incision, 3'-to lesion	3/443	21/18866	0.0124899	0.0602159	0.0460798	RPA3/GTF2H3/RPA2	3
BP	GO:0031061	negative regulation of histone methylation	3/443	21/18866	0.0124899	0.0602159	0.0460798	PRMT6/BRCA1/PIH1D1	3
BP	GO:0043984	histone H4-K16 acetylation	3/443	21/18866	0.0124899	0.0602159	0.0460798	MSL3P1/BRCA1/PIH1D1	3
BP	GO:1905269	positive regulation of chromatin organization	7/443	106/18866	0.0125074	0.0602159	0.0460798	RUVBL2/CCNB1/EED/BRCA1/PPHLN1/CTR9/PIH1D1	7
BP	GO:0043966	histone H3 acetylation	5/443	60/18866	0.0132341	0.0636055	0.0486737	CHEK1/PHF14/TAF5/BRCA1/PIH1D1	5
CC	GO:0098687	chromosomal region	72/457	350/19559	4.06303e-47	1.59271e-44	1.03928e-44	HNRNPA2B1/CBX3/DNA2/MSH2/HNRNPU/MIS18A/SPC25/SSB/NDC80/CHEK1/XPO1/SUV39H2/TTK/NUF2/CENPK/NEK2/CDK1/HJURP/KNSTRN/CENPL/CENPE/HELLS/KIF18A/NUP43/KIF22/MCM6/BUB3/AURKA/ITGB3BP/POLD1/GAR1/NCAPG/SMC3/NSL1/SPC24/BUB1B/SKA3/PTGES3/MAD2L1/PIF1/SPDL1/ORC1/KIF2C/DSN1/XRCC5/NUP37/FEN1/CCNB1/DPY30/CENPH/KNTC1/RECQL4/CHEK2/CDCA5/BUB1/PCNA/ZWINT/CDK2/PLK1/CDCA8/NUP160/MCM4/RAD51/THOC1/CDT1/AURKB/EZH2/LRIF1/SKA…	72
CC	GO:0000775	chromosome, centromeric region	45/457	196/19559	8.99739e-32	1.76349e-29	1.15072e-29	CBX3/HNRNPU/MIS18A/SPC25/NDC80/XPO1/SUV39H2/TTK/NUF2/CENPK/NEK2/HJURP/KNSTRN/CENPL/CENPE/HELLS/KIF18A/NUP43/KIF22/BUB3/AURKA/ITGB3BP/NCAPG/SMC3/NSL1/SPC24/BUB1B/SKA3/MAD2L1/SPDL1/KIF2C/DSN1/NUP37/CCNB1/CENPH/KNTC1/CDCA5/BUB1/ZWINT/PLK1/CDCA8/NUP160/CDT1/AURKB/SKA1	45
CC	GO:0000793	condensed chromosome	44/457	222/19559	3.2884e-28	4.29685e-26	2.8038e-26	CBX3/HNRNPU/SPC25/HMGB2/NDC80/CHEK1/NUF2/CENPK/NEK2/HJURP/KNSTRN/CENPE/NUP43/BUB3/AURKA/RCC1/ITGB3BP/NCAPG/SMC3/HMGB1/NSL1/SPC24/BUB1B/SKA3/NCAPG2/MAD2L1/SPDL1/KIF2C/DSN1/NUP37/NCAPH/CCNB1/CENPH/KNTC1/BUB1/ZWINT/CDK2/PLK1/RAD51/CDT1/AURKB/SKA1/BRCA1/LRPPRC	44
CC	GO:0000776	kinetochore	35/457	137/19559	1.24019e-26	1.21539e-24	7.93071e-25	HNRNPU/SPC25/NDC80/XPO1/TTK/NUF2/CENPK/NEK2/HJURP/KNSTRN/CENPE/KIF18A/NUP43/KIF22/BUB3/ITGB3BP/NSL1/SPC24/BUB1B/SKA3/MAD2L1/SPDL1/KIF2C/DSN1/NUP37/CCNB1/CENPH/KNTC1/BUB1/ZWINT/PLK1/NUP160/CDT1/AURKB/SKA1	35
CC	GO:0000779	condensed chromosome, centromeric region	33/457	122/19559	4.72203e-26	3.70207e-24	2.41569e-24	CBX3/HNRNPU/SPC25/NDC80/NUF2/CENPK/NEK2/HJURP/KNSTRN/CENPE/NUP43/BUB3/AURKA/ITGB3BP/NCAPG/NSL1/SPC24/BUB1B/SKA3/MAD2L1/SPDL1/KIF2C/DSN1/NUP37/CCNB1/CENPH/KNTC1/BUB1/ZWINT/PLK1/CDT1/AURKB/SKA1	33
CC	GO:0000777	condensed chromosome kinetochore	29/457	106/19559	3.44788e-23	2.25262e-21	1.46989e-21	HNRNPU/SPC25/NDC80/NUF2/CENPK/NEK2/HJURP/KNSTRN/CENPE/NUP43/BUB3/ITGB3BP/NSL1/SPC24/BUB1B/SKA3/MAD2L1/SPDL1/KIF2C/DSN1/NUP37/CCNB1/CENPH/KNTC1/BUB1/ZWINT/PLK1/CDT1/SKA1	29
CC	GO:0005819	spindle	46/457	367/19559	9.81534e-21	5.49659e-19	3.58666e-19	CBX3/HNRNPU/KIF20B/TTK/NEK2/CDK1/KNSTRN/FBXO5/NUP62/TPX2/CENPE/KIF18A/KIF22/AURKA/SMC3/CDC7/BUB1B/SKA3/KIF11/BCCIP/MAD2L1/SPDL1/PLK4/KIF15/KIF2C/DSN1/KIF14/CCNB1/KNTC1/KIF4A/PLK1/CDCA8/HAUS8/NPM1/BORA/KIF20A/KIFC1/RAE1/AURKB/TMEM201/MZT1/SKA1/KIF23/ASPM/FAM161A/AAAS	46
CC	GO:0000781	chromosome, telomeric region	28/457	164/19559	1.4556e-16	7.13246e-15	4.6541e-15	HNRNPA2B1/CBX3/DNA2/MSH2/SSB/CHEK1/CDK1/MCM6/POLD1/GAR1/PTGES3/PIF1/ORC1/XRCC5/FEN1/DPY30/RECQL4/CHEK2/PCNA/CDK2/MCM4/RAD51/THOC1/EZH2/LRIF1/ORC3/RPA2/ZGRF1	28
CC	GO:0072686	mitotic spindle	24/457	133/19559	6.11251e-15	2.66234e-13	1.73724e-13	HNRNPU/KIF20B/CDK1/KNSTRN/NUP62/TPX2/CENPE/KIF18A/KIF22/AURKA/SMC3/CDC7/SKA3/KIF11/BCCIP/MAD2L1/KIFC1/RAE1/AURKB/SKA1/KIF23/ASPM/FAM161A/AAAS	24
CC	GO:0005681	spliceosomal complex	28/457	192/19559	9.58307e-15	3.75657e-13	2.45125e-13	HNRNPA2B1/SRSF1/RBMX/NCL/LSM5/HNRNPU/HNRNPH3/MAGOHB/SNRPA/HNRNPM/PPIH/SRSF2/HNRNPC/HNRNPR/HNRNPK/GCFC2/SNRPG/PRPF31/SMNDC1/SNRPE/HNRNPA1/PRPF40A/TRA2A/SNRPB/MAGOH/ZNF830/SNRNP70/LSM6	28
CC	GO:0000922	spindle pole	25/457	165/19559	1.08878e-13	3.88e-12	2.53179e-12	HNRNPU/KIF20B/NEK2/KNSTRN/NUP62/TPX2/AURKA/SMC3/KIF11/BCCIP/MAD2L1/SPDL1/PLK4/DSN1/CCNB1/KNTC1/PLK1/HAUS8/NPM1/RAE1/AURKB/TMEM201/ASPM/FAM161A/AAAS	25
CC	GO:0005657	replication fork	16/457	71/19559	5.99033e-12	1.95684e-10	1.27689e-10	XRCC2/RPA3/PRIM1/MCM10/POLD1/MMS22L/PIF1/PRIM2/PCNA/TIPIN/TONSL/RFC5/RFC3/RPA2/DONSON/GINS4	16
CC	GO:0000784	nuclear chromosome, telomeric region	20/457	124/19559	9.97978e-12	3.00929e-10	1.96363e-10	CBX3/DNA2/MSH2/SSB/CDK1/MCM6/POLD1/GAR1/PIF1/ORC1/XRCC5/FEN1/PCNA/MCM4/RAD51/THOC1/LRIF1/ORC3/RPA2/ZGRF1	20
CC	GO:0000794	condensed nuclear chromosome	18/457	103/19559	2.73121e-11	7.6474e-10	4.99011e-10	NDC80/CHEK1/NUF2/CENPK/NEK2/AURKA/RCC1/SMC3/BUB1B/DSN1/NCAPH/CCNB1/BUB1/PLK1/RAD51/AURKB/BRCA1/LRPPRC	18
CC	GO:0000940	condensed chromosome outer kinetochore	8/457	14/19559	2.21954e-10	5.8004e-09	3.7849e-09	NDC80/BUB1B/SKA3/SPDL1/CCNB1/BUB1/PLK1/SKA1	8
CC	GO:0043596	nuclear replication fork	11/457	41/19559	1.68841e-09	3.89492e-08	2.54153e-08	RPA3/PRIM1/MCM10/POLD1/MMS22L/PRIM2/PCNA/TIPIN/TONSL/RPA2/GINS4	11
CC	GO:0000778	condensed nuclear chromosome kinetochore	8/457	17/19559	1.68913e-09	3.89492e-08	2.54153e-08	NDC80/NUF2/CENPK/BUB1B/DSN1/CCNB1/BUB1/PLK1	8
CC	GO:0000780	condensed nuclear chromosome, centromeric region	10/457	32/19559	1.79002e-09	3.89826e-08	2.54371e-08	NDC80/NUF2/CENPK/AURKA/BUB1B/DSN1/CCNB1/BUB1/PLK1/AURKB	10
CC	GO:0034708	methyltransferase complex	16/457	105/19559	2.8285e-09	5.78933e-08	3.77768e-08	E2F6/PRMT1/RUVBL2/SNRPG/TRMT6/PRPF31/DPY30/WDR4/EED/SNRPE/HDAC2/CLNS1A/SNRPB/N6AMT1/EZH2/PELP1	16
CC	GO:0015030	Cajal body	14/457	78/19559	3.10143e-09	5.78933e-08	3.77768e-08	HNRNPA2B1/XPO1/DKC1/GAR1/PRPF31/SMNDC1/DDX46/NOP58/CDK2/COIL/ZNF473/FBL/TGS1/RDM1	14
CC	GO:0030684	preribosome	14/457	78/19559	3.10143e-09	5.78933e-08	3.77768e-08	UTP6/MRTO4/NOL10/MPHOSPH10/NOP56/RRP15/XRCC5/NOP58/RSL1D1/RRP1B/UTP14A/EMG1/FBL/WDR74	14
CC	GO:0005876	spindle microtubule	13/457	66/19559	3.46074e-09	6.1664e-08	4.02373e-08	HNRNPU/CDK1/CENPE/KIF18A/AURKA/SKA3/KIF11/KNTC1/KIF4A/PLK1/AURKB/SKA1/FAM161A	13
CC	GO:0005874	microtubule	32/457	431/19559	9.50316e-09	1.61967e-07	1.05687e-07	HNRNPU/KIF20B/NEK2/CDK1/KNSTRN/TPX2/CENPE/KIF18A/KIF22/AURKA/CCT8/SKA3/KIF11/KIF15/KIF2C/CCT4/KIF14/KNTC1/KIF4A/CEP57/PLK1/HAUS8/KIF20A/KIFC1/AURKB/SKA1/KIF23/KIF4B/LRPPRC/ASPM/FAM161A/NUDC	32
CC	GO:0005697	telomerase holoenzyme complex	8/457	21/19559	1.30219e-08	2.12116e-07	1.38411e-07	HNRNPU/DKC1/HNRNPC/GAR1/PTGES3/SNRPE/SNRPB/NVL	8
CC	GO:0071013	catalytic step 2 spliceosome	14/457	87/19559	1.35278e-08	2.12116e-07	1.38411e-07	HNRNPA2B1/SRSF1/RBMX/HNRNPU/MAGOHB/HNRNPM/HNRNPC/HNRNPR/HNRNPK/SNRPG/SNRPE/HNRNPA1/SNRPB/MAGOH	14
CC	GO:0016607	nuclear speck	30/457	401/19559	2.35177e-08	3.54574e-07	2.31368e-07	SRSF1/HNRNPU/SRSF3/SRSF7/PPIH/SFPQ/SRSF2/KIF22/NSL1/SRSF10/TIMM50/TCERG1/NOC3L/NCAPG2/CDC25C/TARDBP/PRPF31/SMNDC1/RMI2/DDX46/BARD1/PRPF40A/BCLAF1/THOC1/RBM27/MAGOH/ZNF830/CTR9/SNRNP70/PSPC1	30
CC	GO:0018995	host cellular component	12/457	65/19559	3.00867e-08	4.21214e-07	2.74852e-07	XPO1/NUP62/NUP43/KPNB1/NDC1/NUP37/NUP160/NUP88/RAE1/NUP35/RAN/AAAS	12
CC	GO:0043657	host cell	12/457	65/19559	3.00867e-08	4.21214e-07	2.74852e-07	XPO1/NUP62/NUP43/KPNB1/NDC1/NUP37/NUP160/NUP88/RAE1/NUP35/RAN/AAAS	12
CC	GO:0005643	nuclear pore	13/457	85/19559	8.35437e-08	1.12928e-06	7.36883e-07	NUP62/NUP43/KPNB1/MAD2L1/NDC1/CETN3/NUP37/NUP160/NUP88/RAE1/NUP35/RAN/AAAS	13
CC	GO:0030894	replisome	8/457	26/19559	9.02094e-08	1.17874e-06	7.69153e-07	RPA3/PRIM1/POLD1/PRIM2/PCNA/TONSL/RPA2/DONSON	8
CC	GO:0051233	spindle midzone	9/457	36/19559	1.03152e-07	1.30437e-06	8.51135e-07	HNRNPU/KIF20B/CENPE/KIF18A/AURKA/KIF14/PLK1/CDCA8/AURKB	9
CC	GO:0032040	small-subunit processome	9/457	39/19559	2.1819e-07	2.67282e-06	1.74408e-06	UTP6/NOL10/MPHOSPH10/NOP56/XRCC5/NOP58/UTP14A/EMG1/FBL	9
CC	GO:0005871	kinesin complex	10/457	51/19559	2.38281e-07	2.8305e-06	1.84697e-06	KIF20B/KIF18A/KIF22/KIF11/KIF15/KIF2C/KIF14/KIF20A/KIFC1/KIF23	10
CC	GO:0005732	small nucleolar ribonucleoprotein complex	8/457	30/19559	3.11312e-07	3.58924e-06	2.34207e-06	DKC1/MPHOSPH10/GAR1/NOP56/RPP30/NOP58/FBL/LSM6	8
CC	GO:0034399	nuclear periphery	15/457	131/19559	4.30661e-07	4.8234e-06	3.14739e-06	HNRNPA2B1/HNRNPU/LMNB1/HNRNPM/SFPQ/RUVBL2/SMC3/PCNA/KIF4A/PRPF40A/THOC1/NUP35/LRIF1/KIF4B/PSPC1	15
CC	GO:0005635	nuclear envelope	30/457	473/19559	8.39886e-07	8.89825e-06	5.80632e-06	CBX3/XPO1/CACYBP/MRPL19/LMNB1/CCAR1/NUP62/NUP43/RCC1/KPNB1/MAD2L1/NDC1/CETN3/NUP37/TMPO/CSE1L/FANCL/NUDT1/DTL/NUP160/GTPBP4/NUP88/RAE1/TMEM201/DNAJC2/NUP35/C12orf43/RAN/LRPPRC/AAAS	30
CC	GO:0005759	mitochondrial matrix	30/457	473/19559	8.39886e-07	8.89825e-06	5.80632e-06	DNA2/NARS2/PNPT1/MRPS9/TFAM/CDK1/MRPL19/NDUFAF7/DAP3/MRPL32/DARS2/HSPD1/CCNB1/TBRG4/MALSU1/TEFM/DTYMK/FH/NUDT1/TSFM/RAD51/DLAT/TFB2M/MRPL16/LIAS/IARS2/PDSS1/LRPPRC/PRDX3/TYMS	30
CC	GO:0030496	midbody	17/457	182/19559	1.36955e-06	1.4128e-05	9.21886e-06	HNRNPU/KIF20B/NEK2/CDK1/NUP62/CENPE/AURKA/KIF14/KIF4A/PLK1/CDCA8/MPLKIP/KIF20A/AURKB/RAN/KIF23/ASPM	17
CC	GO:0016363	nuclear matrix	13/457	109/19559	1.59034e-06	1.59849e-05	1.04306e-05	HNRNPA2B1/HNRNPU/LMNB1/HNRNPM/SFPQ/RUVBL2/SMC3/KIF4A/PRPF40A/THOC1/LRIF1/KIF4B/PSPC1	13
CC	GO:0120114	Sm-like protein family complex	13/457	114/19559	2.65168e-06	2.59865e-05	1.69568e-05	LSM5/SNRPA/PPIH/GEMIN6/SNRPG/PRPF31/SNRPE/PRPF40A/CLNS1A/SNRPB/TGS1/SNRNP70/LSM6	13
CC	GO:0097431	mitotic spindle pole	7/457	30/19559	4.64063e-06	4.29576e-05	2.80309e-05	KIF20B/AURKA/SMC3/BCCIP/RAE1/ASPM/FAM161A	7
CC	GO:0034709	methylosome	5/457	12/19559	4.71218e-06	4.29576e-05	2.80309e-05	PRMT1/SNRPG/SNRPE/CLNS1A/SNRPB	5
CC	GO:0042555	MCM complex	5/457	12/19559	4.71218e-06	4.29576e-05	2.80309e-05	MCM6/MCM8/MMS22L/MCM4/TONSL	5
CC	GO:0001650	fibrillar center	13/457	129/19559	1.04931e-05	9.34843e-05	6.10008e-05	ORC6/DKC1/TCOF1/WDR43/GAR1/NOP56/DSN1/DDX46/NOP58/COIL/CDCA7L/FBL/PSPC1	13
CC	GO:1990023	mitotic spindle midzone	5/457	14/19559	1.14586e-05	9.98176e-05	6.51334e-05	HNRNPU/KIF20B/CENPE/KIF18A/AURKB	5
CC	GO:0043601	nuclear replisome	6/457	24/19559	1.48213e-05	0.000126303	8.24159e-05	RPA3/PRIM1/POLD1/PRIM2/TONSL/RPA2	6
CC	GO:0005875	microtubule associated complex	14/457	159/19559	2.2778e-05	0.000189978	0.000123965	KIF20B/KIF18A/KIF22/AURKA/KIF11/KIF15/KIF2C/KIF14/CDCA8/HAUS8/KIF20A/KIFC1/AURKB/KIF23	14
CC	GO:0045120	pronucleus	5/457	16/19559	2.40515e-05	0.000196421	0.000128169	AURKA/EED/CCNA2/HNRNPL/EZH2	5
CC	GO:0030532	small nuclear ribonucleoprotein complex	11/457	102/19559	2.64681e-05	0.000211745	0.000138168	LSM5/SNRPA/PPIH/SNRPG/PRPF31/SNRPE/PRPF40A/SNRPB/TGS1/SNRNP70/LSM6	11
CC	GO:0000307	cyclin-dependent protein kinase holoenzyme complex	7/457	43/19559	5.65157e-05	0.000434396	0.000283454	CDK1/BCCIP/CCNB1/PCNA/CDK2/CCNA2/CKS1B	7
CC	GO:0046540	U4/U6 x U5 tri-snRNP complex	7/457	43/19559	5.65157e-05	0.000434396	0.000283454	LSM5/PPIH/SNRPG/PRPF31/SNRPE/SNRPB/LSM6	7
CC	GO:0005684	U2-type spliceosomal complex	10/457	93/19559	6.28656e-05	0.00047391	0.000309238	LSM5/MAGOHB/GCFC2/SNRPG/PRPF31/SNRPE/PRPF40A/SNRPB/SNRNP70/LSM6	10
CC	GO:0097526	spliceosomal tri-snRNP complex	7/457	44/19559	6.58692e-05	0.000487184	0.000317899	LSM5/PPIH/SNRPG/PRPF31/SNRPE/SNRPB/LSM6	7
CC	GO:0097525	spliceosomal snRNP complex	10/457	96/19559	8.24771e-05	0.000598722	0.000390681	LSM5/SNRPA/PPIH/SNRPG/PRPF31/SNRPE/PRPF40A/SNRPB/SNRNP70/LSM6	10
CC	GO:0072687	meiotic spindle	4/457	12/19559	0.000125453	0.000894137	0.000583446	FBXO5/AURKA/BORA/ASPM	4
CC	GO:0042575	DNA polymerase complex	5/457	22/19559	0.00012914	0.000903979	0.000589868	DNA2/PRIM1/POLD1/POLE2/PRIM2	5
CC	GO:0071005	U2-type precatalytic spliceosome	7/457	50/19559	0.000152189	0.00104663	0.000682952	LSM5/MAGOHB/SNRPG/PRPF31/SNRPE/SNRPB/LSM6	7
CC	GO:0005687	U4 snRNP	4/457	13/19559	0.000177872	0.00120217	0.000784443	SNRPG/PRPF31/SNRPE/SNRPB	4
CC	GO:0005685	U1 snRNP	6/457	37/19559	0.000197961	0.00131031	0.000855008	SNRPA/SNRPG/SNRPE/PRPF40A/SNRPB/SNRNP70	6
CC	GO:0000178	exosome (RNase complex)	5/457	24/19559	0.000200557	0.00131031	0.000855008	PNPT1/EXOSC9/EXOSC2/NVL/WDR74	5
CC	GO:0071011	precatalytic spliceosome	7/457	53/19559	0.00022114	0.00142109	0.000927298	LSM5/MAGOHB/SNRPG/PRPF31/SNRPE/SNRPB/LSM6	7
CC	GO:0043240	Fanconi anaemia nuclear complex	4/457	14/19559	0.000244437	0.00150624	0.00098286	FANCA/FANCF/FANCL/FANCB	4
CC	GO:0101031	chaperone complex	5/457	25/19559	0.000245917	0.00150624	0.00098286	CCT8/STIP1/PTGES3/CCT4/PPP5C	5
CC	GO:1905354	exoribonuclease complex	5/457	25/19559	0.000245917	0.00150624	0.00098286	PNPT1/EXOSC9/EXOSC2/NVL/WDR74	5
CC	GO:0061695	transferase complex, transferring phosphorus-containing groups	16/457	253/19559	0.000320206	0.00193109	0.00126008	DNA2/CDK1/PRIM1/POLD1/POLE2/BCCIP/PRIM2/CCNB1/GTF2H3/PCNA/CDK2/CCNA2/CKS1B/TAF5/POLR1B/CTR9	16
CC	GO:0032993	protein-DNA complex	14/457	205/19559	0.000346298	0.0020568	0.00134211	RPA3/PRIM1/POLD1/GINS1/XRCC5/PRIM2/GTF2H3/PCNA/NPM1/TONSL/ORC3/RPA2/DONSON/GINS4	14
CC	GO:0000176	nuclear exosome (RNase complex)	4/457	16/19559	0.00042824	0.00247316	0.0016138	EXOSC9/EXOSC2/NVL/WDR74	4
CC	GO:0035097	histone methyltransferase complex	8/457	77/19559	0.000429018	0.00247316	0.0016138	E2F6/RUVBL2/PRPF31/DPY30/EED/HDAC2/EZH2/PELP1	8
CC	GO:0000152	nuclear ubiquitin ligase complex	6/457	43/19559	0.000461266	0.00262053	0.00170996	UBE2C/PCGF6/BUB1B/BARD1/BRCA1/CDC23	6
CC	GO:0005814	centriole	11/457	143/19559	0.000546216	0.00299294	0.00195296	SASS6/CEP152/AURKA/BCCIP/CETN3/PLK4/LRRCC1/PLK1/CEP78/HYLS1/RAN	11
CC	GO:0071004	U2-type prespliceosome	4/457	17/19559	0.000549723	0.00299294	0.00195296	SNRPG/PRPF40A/SNRPB/SNRNP70	4
CC	GO:0071010	prespliceosome	4/457	17/19559	0.000549723	0.00299294	0.00195296	SNRPG/PRPF40A/SNRPB/SNRNP70	4
CC	GO:0000803	sex chromosome	5/457	30/19559	0.000599176	0.00321749	0.00209949	HNRNPU/PLK4/EED/CDK2/LRIF1	5
CC	GO:0034719	SMN-Sm protein complex	4/457	19/19559	0.000862724	0.00457011	0.0029821	GEMIN6/SNRPG/SNRPE/SNRPB	4
CC	GO:1905369	endopeptidase complex	7/457	69/19559	0.001124	0.00582598	0.00380159	UCHL5/PSMD13/PIGU/PSMD14/PSMA1/PSMD1/PSMA2	7
CC	GO:1902554	serine/threonine protein kinase complex	8/457	89/19559	0.00112953	0.00582598	0.00380159	CDK1/BCCIP/CCNB1/GTF2H3/PCNA/CDK2/CCNA2/CKS1B	8
CC	GO:0031970	organelle envelope lumen	8/457	90/19559	0.00121494	0.00618515	0.00403596	PNPT1/CACYBP/CCAR1/DTYMK/CHCHD7/COA7/CYCS/TRIAP1	8
CC	GO:0045171	intercellular bridge	7/457	71/19559	0.00133135	0.00667647	0.00435656	KIF20B/TPX2/CDC7/CDCA8/KIF20A/KIF23/CEP131	7
CC	GO:0031080	nuclear pore outer ring	3/457	10/19559	0.00134551	0.00667647	0.00435656	NUP43/NUP37/NUP160	3
CC	GO:0098798	mitochondrial protein complex	15/457	265/19559	0.00150382	0.00736871	0.00480826	DNA2/PNPT1/MRPS9/MRPL19/DAP3/MRPL32/TOMM40/TIMM50/NDUFA4/MALSU1/DLAT/MRPL16/BCS1L/SDHD/SDHB	15
CC	GO:0005652	nuclear lamina	3/457	11/19559	0.00181813	0.00875125	0.0057104	LMNB1/PCNA/NUP35	3
CC	GO:0030687	preribosome, large subunit precursor	4/457	23/19559	0.00183062	0.00875125	0.0057104	MRTO4/RRP15/RRP1B/WDR74	4
CC	GO:0031965	nuclear membrane	16/457	301/19559	0.00202312	0.00955499	0.00623486	CBX3/XPO1/MRPL19/LMNB1/NUP62/RCC1/KPNB1/NDC1/NUDT1/DTL/GTPBP4/TMEM201/DNAJC2/NUP35/LRPPRC/AAAS	16
CC	GO:0044615	nuclear pore nuclear basket	3/457	12/19559	0.00238235	0.0111176	0.00725453	MAD2L1/CETN3/NUP35	3
CC	GO:1902911	protein kinase complex	8/457	104/19559	0.00304496	0.0140426	0.00916316	CDK1/BCCIP/CCNB1/GTF2H3/PCNA/CDK2/CCNA2/CKS1B	8
CC	GO:0009295	nucleoid	5/457	43/19559	0.00315685	0.014224	0.00928149	DNA2/TFAM/TEFM/TFB2M/LRPPRC	5
CC	GO:0042645	mitochondrial nucleoid	5/457	43/19559	0.00315685	0.014224	0.00928149	DNA2/TFAM/TEFM/TFB2M/LRPPRC	5
CC	GO:0000502	proteasome complex	6/457	63/19559	0.00347521	0.0154805	0.0101014	UCHL5/PSMD13/PSMD14/PSMA1/PSMD1/PSMA2	6
CC	GO:0000177	cytoplasmic exosome (RNase complex)	3/457	14/19559	0.00380713	0.0165822	0.0108203	PNPT1/EXOSC9/EXOSC2	3
CC	GO:0000800	lateral element	3/457	14/19559	0.00380713	0.0165822	0.0108203	SMC3/RAD51/BRCA1	3
CC	GO:0044665	MLL1/2 complex	4/457	29/19559	0.00439715	0.0187357	0.0122255	E2F6/RUVBL2/PRPF31/PELP1	4
CC	GO:0071339	MLL1 complex	4/457	29/19559	0.00439715	0.0187357	0.0122255	E2F6/RUVBL2/PRPF31/PELP1	4
CC	GO:0005662	DNA replication factor A complex	3/457	15/19559	0.00467711	0.0195046	0.0127272	RPA3/TONSL/RPA2	3
CC	GO:0031616	spindle pole centrosome	3/457	15/19559	0.00467711	0.0195046	0.0127272	AURKA/NPM1/AURKB	3
CC	GO:0035098	ESC/E(Z) complex	3/457	16/19559	0.00565762	0.0233451	0.0152333	EED/HDAC2/EZH2	3
CC	GO:1905368	peptidase complex	7/457	92/19559	0.00578154	0.023608	0.0154048	UCHL5/PSMD13/PIGU/PSMD14/PSMA1/PSMD1/PSMA2	7
CC	GO:0017053	transcription repressor complex	6/457	76/19559	0.00868685	0.0345209	0.0225257	TFAP4/HMGB1/LIN9/HDAC2/DEPDC1/HDGF	6
CC	GO:0101002	ficolin-1-rich granule	8/457	124/19559	0.00871829	0.0345209	0.0225257	HMGB1/KPNB1/CCT8/PSMD13/PSMD14/C1orf35/PPIA/PSMA2	8
CC	GO:1904813	ficolin-1-rich granule lumen	8/457	124/19559	0.00871829	0.0345209	0.0225257	HMGB1/KPNB1/CCT8/PSMD13/PSMD14/C1orf35/PPIA/PSMA2	8
CC	GO:0035145	exon-exon junction complex	3/457	20/19559	0.0107488	0.0421354	0.0274944	SRSF1/MAGOHB/MAGOH	3
CC	GO:0005758	mitochondrial intermembrane space	6/457	80/19559	0.0110517	0.0428939	0.0279893	PNPT1/DTYMK/CHCHD7/COA7/CYCS/TRIAP1	6
CC	GO:0035770	ribonucleoprotein granule	12/457	243/19559	0.0121857	0.0467025	0.0304745	NCL/HNRNPU/DDX1/KPNB1/HNRNPK/SNRPG/TARDBP/BARD1/DHX9/HNRNPL/PSMA2/LSM6	12
CC	GO:0005838	proteasome regulatory particle	3/457	21/19559	0.0123263	0.0467025	0.0304745	PSMD13/PSMD14/PSMD1	3
CC	GO:0090734	site of DNA damage	6/457	82/19559	0.0123905	0.0467025	0.0304745	CBX3/RPA3/XRCC5/RFWD3/RAD51/RPA2	6
CC	GO:1990391	DNA repair complex	4/457	40/19559	0.0138412	0.0513974	0.033538	MSH2/POLD1/XRCC5/PMS1	4
CC	GO:0005680	anaphase-promoting complex	3/457	22/19559	0.0140294	0.0513974	0.033538	UBE2C/BUB1B/CDC23	3
CC	GO:0005682	U5 snRNP	3/457	22/19559	0.0140294	0.0513974	0.033538	SNRPG/SNRPE/SNRPB	3
CC	GO:0000313	organellar ribosome	6/457	87/19559	0.0162276	0.0572167	0.0373353	MRPS9/MRPL19/DAP3/MRPL32/MALSU1/MRPL16	6
CC	GO:0005761	mitochondrial ribosome	6/457	87/19559	0.0162276	0.0572167	0.0373353	MRPS9/MRPL19/DAP3/MRPL32/MALSU1/MRPL16	6
CC	GO:0000791	euchromatin	4/457	42/19559	0.0163476	0.0572167	0.0373353	CBX3/RBMX/RUVBL2/RRP1B	4
CC	GO:0000795	synaptonemal complex	4/457	42/19559	0.0163476	0.0572167	0.0373353	SMC3/PLK1/RAD51/BRCA1	4
CC	GO:0099086	synaptonemal structure	4/457	42/19559	0.0163476	0.0572167	0.0373353	SMC3/PLK1/RAD51/BRCA1	4
CC	GO:0005686	U2 snRNP	3/457	24/19559	0.0178167	0.0612645	0.0399765	SNRPG/SNRPE/SNRPB	3
CC	GO:0022624	proteasome accessory complex	3/457	24/19559	0.0178167	0.0612645	0.0399765	PSMD13/PSMD14/PSMD1	3
CC	GO:0097346	INO80-type complex	3/457	25/19559	0.0199025	0.0678417	0.0442683	ANP32E/RUVBL2/UCHL5	3
CC	GO:0036464	cytoplasmic ribonucleoprotein granule	11/457	233/19559	0.0215358	0.071322	0.0465393	NCL/HNRNPU/DDX1/KPNB1/HNRNPK/SNRPG/TARDBP/BARD1/DHX9/PSMA2/LSM6	11
CC	GO:0000805	X chromosome	2/457	10/19559	0.0216513	0.071322	0.0465393	CDK2/LRIF1	2
CC	GO:0005641	nuclear envelope lumen	2/457	10/19559	0.0216513	0.071322	0.0465393	CACYBP/CCAR1	2
CC	GO:0072588	box H/ACA RNP complex	2/457	10/19559	0.0216513	0.071322	0.0465393	DKC1/GAR1	2
MF	GO:0140097	catalytic activity, acting on DNA	30/449	209/18352	5.29554e-15	2.66895e-12	2.0346e-12	DNA2/DDX1/DKC1/NEIL3/GEN1/MCM6/RUVBL2/POLD1/MCM8/POLE2/PTGES3/PIF1/MGME1/LIG1/XRCC5/FEN1/RECQL4/CHTF18/PCNA/DHX9/MCM4/RAD51/RAD54B/N6AMT1/RFC5/EXO1/RFC3/ZGRF1/GINS4/RAD54L	30
MF	GO:0016887	ATPase activity	41/449	423/18352	5.52105e-14	1.3913e-11	1.06062e-11	DNA2/MSH2/FIGNL1/XRCC2/KIF20B/DDX1/DDX55/DDX56/HELLS/DDX10/KIF18A/KIF22/MCM6/RUVBL2/MCM8/CCT8/KIF11/PIF1/KIF15/KIF2C/XRCC5/KIF14/HSPD1/RECQL4/CHTF18/DDX46/PMS1/DHX9/DDX27/MCM4/RAD51/KIF20A/KIFC1/RAD54B/RFC5/RFC3/KIF23/GINS4/NVL/RAD54L/DHX34	41
MF	GO:0004386	helicase activity	24/449	160/18352	1.11389e-12	1.87134e-10	1.42656e-10	DNA2/DDX1/DDX55/DDX56/HELLS/DDX10/MCM6/RUVBL2/MCM8/PIF1/XRCC5/RECQL4/CHTF18/DDX46/DHX9/DDX27/MCM4/RAD51/RAD54B/RFC5/RFC3/GINS4/RAD54L/DHX34	24
MF	GO:0008094	DNA-dependent ATPase activity	18/449	108/18352	1.29398e-10	1.63041e-08	1.2429e-08	DNA2/MSH2/XRCC2/MCM6/RUVBL2/MCM8/PIF1/XRCC5/RECQL4/CHTF18/DHX9/MCM4/RAD51/RAD54B/RFC5/RFC3/GINS4/RAD54L	18
MF	GO:0003697	single-stranded DNA binding	18/449	114/18352	3.25274e-10	3.27876e-08	2.49947e-08	HNRNPA2B1/MSH2/HNRNPU/HMGB2/RPA3/NEIL3/MCM10/MCM6/HMGB1/MCM8/HSPD1/DHX9/HNRNPA1/MCM4/RAD51/NUP35/RPA2/LRPPRC	18
MF	GO:0003678	DNA helicase activity	15/449	78/18352	5.69403e-10	4.78298e-08	3.64617e-08	DNA2/MCM6/RUVBL2/MCM8/PIF1/XRCC5/RECQL4/CHTF18/DHX9/MCM4/RAD51/RAD54B/RFC5/RFC3/GINS4	15
MF	GO:0017116	single-stranded DNA helicase activity	8/449	18/18352	4.25866e-09	2.91904e-07	2.22525e-07	DNA2/MCM6/PIF1/CHTF18/DHX9/RAD51/RFC5/RFC3	8
MF	GO:0003777	microtubule motor activity	14/449	77/18352	4.6334e-09	2.91904e-07	2.22525e-07	KIF20B/CENPE/KIF18A/KIF22/SMC3/KIF11/KIF15/KIF2C/KIF14/KIF4A/KIF20A/KIFC1/KIF23/KIF4B	14
MF	GO:0008017	microtubule binding	25/449	265/18352	9.11765e-09	4.714e-07	3.59359e-07	KIF20B/KNSTRN/TPX2/CENPE/KIF18A/KIF22/KIF11/CETN3/CRIPT/KIF15/KIF2C/KIF14/PPP5C/KIF4A/CEP57/PLK1/HAUS8/KIF20A/KIFC1/RAE1/SKA1/KIF23/KIF4B/LRPPRC/FAM161A	25
MF	GO:0140098	catalytic activity, acting on RNA	31/449	390/18352	9.35318e-09	4.714e-07	3.59359e-07	NARS2/PNPT1/CPSF3/DDX1/DDX55/DDX56/PRIM1/DDX10/DARS2/EXOSC9/PIF1/FARSB/FEN1/PRIM2/RPP30/TRMT6/WDR4/DDX46/DHX9/DDX27/EXOSC2/FDXACB1/TFB2M/EMG1/RAD54B/IARS2/POLR1B/EXO1/FBL/TGS1/DHX34	31
MF	GO:0016741	transferase activity, transferring one-carbon groups	23/449	229/18352	1.1085e-08	5.07894e-07	3.87179e-07	SUV39H2/NDUFAF7/FAM98B/PRMT1/ATIC/SMYD5/TRMT6/METTL18/METTL21A/WDR4/EED/PRMT6/CAMKMT/FDXACB1/TFB2M/GART/EMG1/N6AMT1/EZH2/PRMT3/FBL/TGS1/TYMS	23
MF	GO:0015631	tubulin binding	29/449	365/18352	2.87254e-08	1.20647e-06	9.19717e-07	KIF20B/KNSTRN/CACYBP/TPX2/CENPE/KIF18A/KIF22/SMC3/KIF11/BCCIP/CETN3/CRIPT/KIF15/KIF2C/KIF14/PPP5C/KIF4A/CEP57/PLK1/HAUS8/KIF20A/KIFC1/RAE1/SKA1/BRCA1/KIF23/KIF4B/LRPPRC/FAM161A	29
MF	GO:0003688	DNA replication origin binding	8/449	23/18352	4.28465e-08	1.66112e-06	1.26631e-06	MCM10/MCM6/MCM8/ORC1/HSPD1/DHX9/MCM4/ORC3	8
MF	GO:0003684	damaged DNA binding	12/449	65/18352	4.94647e-08	1.78073e-06	1.35749e-06	MSH2/HMGB2/RPA3/NEIL3/POLD1/HMGB1/XRCC5/FEN1/RECQL4/PCNA/BRCA1/RPA2	12
MF	GO:0000217	DNA secondary structure binding	9/449	34/18352	8.83457e-08	2.96841e-06	2.26289e-06	MSH2/HMGB2/XRCC2/NEIL3/GEN1/HMGB1/HNRNPD/CLSPN/RECQL4	9
MF	GO:0008168	methyltransferase activity	21/449	218/18352	9.94639e-08	3.13311e-06	2.38844e-06	SUV39H2/NDUFAF7/FAM98B/PRMT1/SMYD5/TRMT6/METTL18/METTL21A/WDR4/EED/PRMT6/CAMKMT/FDXACB1/TFB2M/EMG1/N6AMT1/EZH2/PRMT3/FBL/TGS1/TYMS	21
MF	GO:0008170	N-methyltransferase activity	14/449	100/18352	1.45986e-07	4.32804e-06	3.29936e-06	SUV39H2/NDUFAF7/PRMT1/METTL18/METTL21A/EED/PRMT6/CAMKMT/FDXACB1/TFB2M/N6AMT1/EZH2/PRMT3/FBL	14
MF	GO:0008757	S-adenosylmethionine-dependent methyltransferase activity	17/449	160/18352	4.14216e-07	1.1598e-05	8.84145e-06	SUV39H2/NDUFAF7/PRMT1/TRMT6/METTL18/METTL21A/WDR4/EED/PRMT6/CAMKMT/FDXACB1/TFB2M/EMG1/N6AMT1/EZH2/PRMT3/FBL	17
MF	GO:0043021	ribonucleoprotein complex binding	15/449	133/18352	9.26427e-07	2.45747e-05	1.87338e-05	HNRNPU/MTIF2/SNRPA/PPIH/TIMM50/PRPF31/MALSU1/DHX9/NPM1/PTCD3/SNRPB/SRP9/EZH2/PRMT3/NVL	15
MF	GO:0048256	flap endonuclease activity	5/449	10/18352	1.95234e-06	4.90053e-05	3.73578e-05	DNA2/GEN1/FEN1/EXO1/ZGRF1	5
MF	GO:0035173	histone kinase activity	6/449	17/18352	2.04189e-06	4.90053e-05	3.73578e-05	CHEK1/CDK1/AURKA/CCNB1/CDK2/AURKB	6
MF	GO:0008276	protein methyltransferase activity	12/449	91/18352	2.18133e-06	4.99722e-05	3.8095e-05	SUV39H2/NDUFAF7/FAM98B/PRMT1/METTL21A/EED/PRMT6/CAMKMT/N6AMT1/EZH2/PRMT3/FBL	12
MF	GO:0003774	motor activity	14/449	132/18352	4.44052e-06	9.73054e-05	7.41781e-05	KIF20B/CENPE/KIF18A/KIF22/SMC3/KIF11/KIF15/KIF2C/KIF14/KIF4A/KIF20A/KIFC1/KIF23/KIF4B	14
MF	GO:1990825	sequence-specific mRNA binding	5/449	13/18352	9.38165e-06	0.000197015	0.000150189	SSB/SRSF3/DHX9/DHFR/TYMS	5
MF	GO:0030515	snoRNA binding	7/449	32/18352	9.92277e-06	0.000200043	0.000152497	DKC1/UTP6/GAR1/NOP56/XRCC5/NOP58/NUDT1	7
MF	GO:0042162	telomeric DNA binding	7/449	36/18352	2.2615e-05	0.000438383	0.000334189	HNRNPA2B1/NCL/PIF1/HNRNPD/XRCC5/HNRNPA1/RPA2	7
MF	GO:0042393	histone binding	18/449	238/18352	2.43964e-05	0.000455399	0.000347161	NASP/HJURP/PHF14/ANP32E/RCC1/NCAPG2/PTMA/ASF1B/PRMT6/CHAF1B/NPM1/TONSL/DNAJC2/CKS1B/SSRP1/ANP32A/PIH1D1/DEK	18
MF	GO:0003730	mRNA 3'-UTR binding	12/449	117/18352	2.98856e-05	0.00053794	0.000410084	HNRNPA2B1/HNRNPU/FUS/HNRNPC/HNRNPR/EXOSC9/ILF3/HNRNPD/TARDBP/RSL1D1/HNRNPL/NUDT21	12
MF	GO:0000400	four-way junction DNA binding	5/449	17/18352	4.15956e-05	0.000698806	0.000532715	MSH2/HMGB2/XRCC2/GEN1/HMGB1	5
MF	GO:0016888	endodeoxyribonuclease activity, producing 5'-phosphomonoesters	5/449	17/18352	4.15956e-05	0.000698806	0.000532715	DNA2/GEN1/FEN1/EXO1/ZGRF1	5
MF	GO:0001094	TFIID-class transcription factor complex binding	4/449	10/18352	6.6045e-05	0.00105822	0.000806706	RUVBL2/NOP58/ZNHIT6/FBL	4
MF	GO:0031072	heat shock protein binding	12/449	127/18352	6.73042e-05	0.00105822	0.000806706	TFAM/CDK1/NUP62/KPNB1/STIP1/PTGES3/METTL18/METTL21A/PPP5C/CAMKMT/HDAC2/DNAJC2	12
MF	GO:0003727	single-stranded RNA binding	10/449	90/18352	6.92883e-05	0.00105822	0.000806706	RBMX/HNRNPU/SSB/PNPT1/DDX1/HNRNPC/ILF3/KHDRBS1/DHX9/HNRNPA1	10
MF	GO:0001091	RNA polymerase II general transcription initiation factor binding	5/449	19/18352	7.50638e-05	0.00111271	0.000848244	HNRNPU/RUVBL2/NOP58/ZNHIT6/FBL	5
MF	GO:0070182	DNA polymerase binding	5/449	20/18352	9.80824e-05	0.00138642	0.0010569	HMGB1/PTGES3/PCNA/RAD51/CDT1	5
MF	GO:0016273	arginine N-methyltransferase activity	4/449	11/18352	0.000101781	0.00138642	0.0010569	NDUFAF7/PRMT1/PRMT6/PRMT3	4
MF	GO:0016274	protein-arginine N-methyltransferase activity	4/449	11/18352	0.000101781	0.00138642	0.0010569	NDUFAF7/PRMT1/PRMT6/PRMT3	4
MF	GO:0003724	RNA helicase activity	9/449	77/18352	0.000107206	0.00142189	0.00108394	DDX1/DDX55/DDX56/DDX10/DDX46/DHX9/DDX27/RAD54B/DHX34	9
MF	GO:0051082	unfolded protein binding	11/449	118/18352	0.000151728	0.00196079	0.00149475	RUVBL2/SRSF10/CCT8/PTGES3/PFDN4/CCT4/HSPD1/CHAF1B/NPM1/PPIA/NUDC	11
MF	GO:0070034	telomerase RNA binding	5/449	22/18352	0.000160001	0.00201602	0.00153686	HNRNPU/DKC1/HNRNPC/GAR1/SNRPB	5
MF	GO:0004527	exonuclease activity	9/449	83/18352	0.000191986	0.00236002	0.0017991	PNPT1/CPSF3/DDX1/POLD1/EXOSC9/MGME1/FEN1/EXOSC2/EXO1	9
MF	GO:0001098	basal transcription machinery binding	8/449	72/18352	0.000366692	0.00429797	0.00327644	HNRNPU/WDR43/RUVBL2/NOP58/DHX9/ZNHIT6/FBL/CTR9	8
MF	GO:0001099	basal RNA polymerase II transcription machinery binding	8/449	72/18352	0.000366692	0.00429797	0.00327644	HNRNPU/WDR43/RUVBL2/NOP58/DHX9/ZNHIT6/FBL/CTR9	8
MF	GO:0008574	ATP-dependent microtubule motor activity, plus-end-directed	4/449	16/18352	0.000509312	0.0057435	0.0043784	KIF20B/KIF18A/KIF11/KIF14	4
MF	GO:0016796	exonuclease activity, active with either ribo- or deoxyribonucleic acids and producing 5'-phosphomonoesters	7/449	58/18352	0.000512812	0.0057435	0.0043784	PNPT1/POLD1/EXOSC9/MGME1/FEN1/EXOSC2/EXO1	7
MF	GO:0017056	structural constituent of nuclear pore	5/449	28/18352	0.000529148	0.00579762	0.00441965	NUP62/NDC1/NUP160/NUP88/NUP35	5
MF	GO:0004536	deoxyribonuclease activity	7/449	59/18352	0.000569784	0.00598274	0.00456077	DNA2/GEN1/POLD1/MGME1/FEN1/EXO1/ZGRF1	7
MF	GO:0042054	histone methyltransferase activity	7/449	59/18352	0.000569784	0.00598274	0.00456077	SUV39H2/PRMT1/EED/PRMT6/N6AMT1/EZH2/FBL	7
MF	GO:0008187	poly-pyrimidine tract binding	5/449	29/18352	0.000626661	0.00644566	0.00491367	HNRNPU/SSB/PNPT1/HNRNPC/KHDRBS1	5
MF	GO:0004518	nuclease activity	14/449	210/18352	0.000690291	0.00695814	0.00530434	DNA2/PNPT1/EME1/CPSF3/DDX1/GEN1/POLD1/EXOSC9/MGME1/FEN1/RPP30/EXOSC2/EXO1/ZGRF1	14
MF	GO:0140142	nucleocytoplasmic carrier activity	5/449	31/18352	0.000861306	0.00851173	0.00648868	XPO1/KPNB1/CSE1L/TMCO6/RAN	5
MF	GO:0043138	3'-5' DNA helicase activity	4/449	19/18352	0.00102338	0.00975309	0.007435	MCM6/RECQL4/DHX9/GINS4	4
MF	GO:0036002	pre-mRNA binding	7/449	65/18352	0.00102562	0.00975309	0.007435	HNRNPA2B1/HNRNPU/SRSF2/TARDBP/HNRNPA1/HNRNPL/SLBP	7
MF	GO:0016893	endonuclease activity, active with either ribo- or deoxyribonucleic acids and producing 5'-phosphomonoesters	6/449	48/18352	0.00106629	0.00995206	0.00758668	DNA2/GEN1/FEN1/RPP30/EXO1/ZGRF1	6
MF	GO:0031490	chromatin DNA binding	9/449	106/18352	0.00117166	0.0107367	0.00818479	HNRNPU/HMGN1/RUVBL2/RCC1/HNRNPC/HMGN2/DHX9/HDAC2/EZH2	9
MF	GO:0051536	iron-sulfur cluster binding	7/449	67/18352	0.00122875	0.0108647	0.00828241	DNA2/POLD1/PRIM2/KIF4A/LIAS/SDHB/KIF4B	7
MF	GO:0051540	metal cluster binding	7/449	67/18352	0.00122875	0.0108647	0.00828241	DNA2/POLD1/PRIM2/KIF4A/LIAS/SDHB/KIF4B	7
MF	GO:0008173	RNA methyltransferase activity	7/449	69/18352	0.00146208	0.012705	0.00968532	TRMT6/WDR4/FDXACB1/TFB2M/EMG1/FBL/TGS1	7
MF	GO:0008641	ubiquitin-like modifier activating enzyme activity	3/449	10/18352	0.0015357	0.0128999	0.00983387	NAE1/SAE1/UBA2	3
MF	GO:0098505	G-rich strand telomeric DNA binding	3/449	10/18352	0.0015357	0.0128999	0.00983387	HNRNPA2B1/HNRNPA1/RPA2	3
MF	GO:0031491	nucleosome binding	7/449	70/18352	0.00159101	0.0131454	0.010021	HMGN1/RCC1/HNRNPC/HMGN2/EED/HDAC2/SSRP1	7
MF	GO:0004529	exodeoxyribonuclease activity	4/449	22/18352	0.00182252	0.0145802	0.0111148	POLD1/MGME1/FEN1/EXO1	4
MF	GO:0016895	exodeoxyribonuclease activity, producing 5'-phosphomonoesters	4/449	22/18352	0.00182252	0.0145802	0.0111148	POLD1/MGME1/FEN1/EXO1	4
MF	GO:0005049	nuclear export signal receptor activity	3/449	11/18352	0.00207342	0.0158334	0.0120701	XPO1/CSE1L/RAN	3
MF	GO:0032404	mismatch repair complex binding	3/449	11/18352	0.00207342	0.0158334	0.0120701	MSH2/MCM8/PCNA	3
MF	GO:0047429	nucleoside-triphosphate diphosphatase activity	3/449	11/18352	0.00207342	0.0158334	0.0120701	NUDT15/DHX9/NUDT1	3
MF	GO:0016874	ligase activity	11/449	165/18352	0.00251329	0.0186058	0.0141836	NARS2/DARS2/LIG1/FARSB/NAE1/PAICS/SAE1/UBA2/DPH6/GART/IARS2	11
MF	GO:0008649	rRNA methyltransferase activity	4/449	24/18352	0.00254723	0.0186058	0.0141836	FDXACB1/TFB2M/EMG1/FBL	4
MF	GO:0140102	catalytic activity, acting on a rRNA	4/449	24/18352	0.00254723	0.0186058	0.0141836	FDXACB1/TFB2M/EMG1/FBL	4
MF	GO:0005542	folic acid binding	3/449	12/18352	0.00271465	0.018973	0.0144635	SLC19A1/DHFR/TYMS	3
MF	GO:0043047	single-stranded telomeric DNA binding	3/449	12/18352	0.00271465	0.018973	0.0144635	HNRNPA2B1/HNRNPA1/RPA2	3
MF	GO:0097157	pre-mRNA intronic binding	3/449	12/18352	0.00271465	0.018973	0.0144635	HNRNPA2B1/TARDBP/HNRNPL	3
MF	GO:0004520	endodeoxyribonuclease activity	5/449	40/18352	0.00278571	0.018973	0.0144635	DNA2/GEN1/FEN1/EXO1/ZGRF1	5
MF	GO:0031492	nucleosomal DNA binding	5/449	40/18352	0.00278571	0.018973	0.0144635	HMGN1/RCC1/HNRNPC/HMGN2/HDAC2	5
MF	GO:0070063	RNA polymerase binding	7/449	79/18352	0.00319	0.0214368	0.0163418	HNRNPU/TCOF1/WDR43/TCERG1/DHX9/BRCA1/CTR9	7
MF	GO:0008266	poly(U) RNA binding	4/449	26/18352	0.00344832	0.0218013	0.0166196	SSB/PNPT1/HNRNPC/KHDRBS1	4
MF	GO:0035925	mRNA 3'-UTR AU-rich region binding	4/449	26/18352	0.00344832	0.0218013	0.0166196	EXOSC9/ILF3/HNRNPD/NUDT21	4
MF	GO:0030544	Hsp70 protein binding	5/449	42/18352	0.00346052	0.0218013	0.0166196	CDK1/NUP62/STIP1/METTL21A/DNAJC2	5
MF	GO:0051539	4 iron, 4 sulfur cluster binding	5/449	42/18352	0.00346052	0.0218013	0.0166196	DNA2/POLD1/PRIM2/LIAS/SDHB	5
MF	GO:0051879	Hsp90 protein binding	5/449	42/18352	0.00346052	0.0218013	0.0166196	NUP62/KPNB1/STIP1/PTGES3/PPP5C	5
MF	GO:0016279	protein-lysine N-methyltransferase activity	6/449	61/18352	0.00369744	0.0230063	0.0175382	SUV39H2/METTL21A/EED/CAMKMT/N6AMT1/EZH2	6
MF	GO:0017091	AU-rich element binding	4/449	27/18352	0.0039709	0.0243556	0.0185668	EXOSC9/ILF3/HNRNPD/NUDT21	4
MF	GO:0016278	lysine N-methyltransferase activity	6/449	62/18352	0.00401094	0.0243556	0.0185668	SUV39H2/METTL21A/EED/CAMKMT/N6AMT1/EZH2	6
MF	GO:0140296	general transcription initiation factor binding	5/449	44/18352	0.00424536	0.0254722	0.019418	HNRNPU/RUVBL2/NOP58/ZNHIT6/FBL	5
MF	GO:0030983	mismatched DNA binding	3/449	14/18352	0.00433111	0.0256809	0.0195771	MSH2/PCNA/PMS1	3
MF	GO:0044389	ubiquitin-like protein ligase binding	16/449	316/18352	0.00505827	0.0296179	0.0225784	CACYBP/UBE2C/AURKA/HSPBP1/XRCC5/HSPD1/CCNB1/FANCL/NAE1/CHEK2/PA2G4/PSMD1/UBE2T/BRCA1/RPA2/LRPPRC	16
MF	GO:0001046	core promoter sequence-specific DNA binding	5/449	46/18352	0.00514949	0.0296179	0.0225784	RUVBL2/POU2F1/NPM1/EZH2/PIH1D1	5
MF	GO:0070717	poly-purine tract binding	4/449	29/18352	0.00517138	0.0296179	0.0225784	HNRNPU/PNPT1/DDX1/KHDRBS1	4
MF	GO:0098847	sequence-specific single stranded DNA binding	3/449	15/18352	0.00531651	0.030107	0.0229512	HNRNPA2B1/HNRNPA1/RPA2	3
MF	GO:0016779	nucleotidyltransferase activity	9/449	133/18352	0.00546522	0.0306052	0.0233311	PNPT1/DKC1/PRIM1/POLD1/POLE2/PTGES3/PRIM2/POLR1B/MTPAP	9
MF	GO:1904047	S-adenosyl-L-methionine binding	3/449	16/18352	0.00642587	0.0355894	0.0271306	SUV39H2/PRMT1/N6AMT1	3
MF	GO:0008022	protein C-terminus binding	11/449	189/18352	0.00697416	0.0382063	0.0291255	MSH2/NCL/ITGB3BP/STIP1/MAD2L1/XRCC5/PCNA/SAE1/COIL/RAD51/PRDX3	11
MF	GO:0000287	magnesium ion binding	12/449	217/18352	0.00735029	0.0398338	0.0303662	MSH2/FIGNL1/GEN1/PIF1/FARSB/FEN1/CDK2/PLK1/UBA2/PRTFDC1/MTPAP/RAN	12
MF	GO:0043024	ribosomal small subunit binding	3/449	17/18352	0.00766286	0.041086	0.0313208	MTIF2/NPM1/PTCD3	3
MF	GO:0008301	DNA binding, bending	3/449	18/18352	0.00903069	0.0479102	0.036523	HMGB2/TFAM/HMGB1	3
MF	GO:1990939	ATP-dependent microtubule motor activity	4/449	34/18352	0.00917555	0.0481716	0.0367223	KIF20B/KIF18A/KIF11/KIF14	4
MF	GO:0017069	snRNA binding	5/449	54/18352	0.0101382	0.052677	0.0401569	HNRNPU/SNRPA/PRPF31/COIL/SNRNP70	5
MF	GO:0008409	5'-3' exonuclease activity	3/449	19/18352	0.0105321	0.0541649	0.0412911	CPSF3/FEN1/EXO1	3
MF	GO:0034061	DNA polymerase activity	4/449	36/18352	0.0112179	0.0571091	0.0435355	DKC1/POLD1/POLE2/PTGES3	4
MF	GO:0003712	transcription coregulator activity	21/449	498/18352	0.011378	0.0573454	0.0437157	HNRNPU/HMGB2/DDX1/FUS/CCAR1/SRSF2/CEBPZ/RUVBL2/HMGB1/GMNN/TCERG1/DHX9/NPM1/RRP1B/HDGF/BCLAF1/TFB2M/TAF5/EZH2/MCIDAS/BRCA1	21
MF	GO:0051010	microtubule plus-end binding	3/449	20/18352	0.0121692	0.0607257	0.0462926	KNSTRN/KIF18A/KIF2C	3
MF	GO:0004519	endonuclease activity	8/449	127/18352	0.0129022	0.0637521	0.0485997	DNA2/EME1/CPSF3/GEN1/FEN1/RPP30/EXO1/ZGRF1	8

## Sheet: Table. S5
Table. S5: Functional annotation for m6A phenotype -related genes (Kyoto Encyclopedia of Genes and Genomes)
ID	Description	GeneRatio	BgRatio	pvalue	p.adjust	qvalue	geneID	Count
hsa03040	Spliceosome	30/212	147/8105	5.04972e-19	5.01999e-17	4.39055e-17	SRSF1/RBMX/LSM5/HNRNPU/SRSF3/FUS/SRSF7/RP9/MAGOHB/SNRPA/HNRNPM/PPIH/SRSF2/HNRNPC/SRSF10/HNRNPK/TCERG1/SNRPG/PRPF31/SMNDC1/DDX46/SNRPE/HNRNPA1/PRPF40A/TRA2A/THOC1/SNRPB/MAGOH/SNRNP70/LSM6	30
hsa04110	Cell cycle	28/212	126/8105	7.38234e-19	5.01999e-17	4.39055e-17	CHEK1/TTK/ORC6/CDK1/CDC25A/MCM6/BUB3/SMC3/CDC7/BUB1B/MAD2L1/ORC1/CDC25C/CCNB1/CHEK2/BUB1/PCNA/CDK2/CCNA2/PLK1/HDAC2/SKP2/MCM4/RBL1/E2F3/ORC3/CDC23/DBF4	28
hsa03030	DNA replication	14/212	36/8105	1.04499e-13	4.7373e-12	4.14331e-12	DNA2/RPA3/PRIM1/MCM6/POLD1/POLE2/LIG1/FEN1/PRIM2/PCNA/MCM4/RFC5/RFC3/RPA2	14
hsa03008	Ribosome biogenesis in eukaryotes	17/212	109/8105	2.5811e-09	7.82793e-08	6.84641e-08	XPO1/DKC1/TCOF1/WDR75/UTP6/WDR43/MPHOSPH10/GAR1/NOP56/RPP30/NOP58/GTPBP4/UTP14A/EMG1/FBL/RAN/NVL	17
hsa03430	Mismatch repair	9/212	23/8105	2.87792e-09	7.82793e-08	6.84641e-08	MSH2/RPA3/POLD1/LIG1/PCNA/RFC5/EXO1/RFC3/RPA2	9
hsa03013	Nucleocytoplasmic transport	16/212	108/8105	1.65761e-08	3.75726e-07	3.28615e-07	XPO1/MAGOHB/NUP62/NUP43/KPNB1/NDC1/NUP37/CSE1L/NUP160/NUP88/THOC1/RAE1/NUP35/MAGOH/RAN/AAAS	16
hsa03440	Homologous recombination	10/212	41/8105	6.69531e-08	1.3008e-06	1.1377e-06	XRCC2/EME1/RPA3/POLD1/BARD1/RAD51/RAD54B/BRCA1/RPA2/RAD54L	10
hsa03460	Fanconi anemia pathway	11/212	54/8105	1.07969e-07	1.83548e-06	1.60533e-06	EME1/FANCA/RPA3/FANCF/FANCL/RMI2/RAD51/FANCB/UBE2T/BRCA1/RPA2	11
hsa03420	Nucleotide excision repair	9/212	47/8105	2.78004e-06	4.20095e-05	3.67421e-05	RPA3/POLD1/POLE2/LIG1/GTF2H3/PCNA/RFC5/RFC3/RPA2	9
hsa04914	Progesterone-mediated oocyte maturation	12/212	102/8105	1.27968e-05	0.000174037	0.000152215	CDK1/CDC25A/KIF22/AURKA/MAD2L1/CDC25C/CCNB1/BUB1/CDK2/CCNA2/PLK1/CDC23	12
hsa03410	Base excision repair	7/212	33/8105	1.81672e-05	0.000224613	0.000196449	NEIL3/POLD1/HMGB1/POLE2/LIG1/FEN1/PCNA	7
hsa05014	Amyotrophic lateral sclerosis	24/212	364/8105	2.56612e-05	0.000290827	0.000254361	HNRNPA2B1/SRSF3/FUS/SRSF7/NUP62/NUP43/TOMM40/NDUFA4/NDC1/NUP37/TARDBP/PSMD13/HNRNPA1/NUP160/PSMD14/NUP88/RAE1/PSMA1/NUP35/PSMD1/SDHD/CYCS/SDHB/PSMA2	24
hsa04114	Oocyte meiosis	11/212	131/8105	0.00061452	0.00642882	0.00562273	CDK1/FBXO5/AURKA/SMC3/MAD2L1/CDC25C/CCNB1/BUB1/CDK2/PLK1/CDC23	11
hsa00020	Citrate cycle (TCA cycle)	5/212	30/8105	0.000976029	0.00948142	0.00829258	MDH1/FH/DLAT/SDHD/SDHB	5
hsa01523	Antifolate resistance	5/212	31/8105	0.00113929	0.0103295	0.00903435	ATIC/SLC19A1/GART/DHFR/TYMS	5
hsa00670	One carbon pool by folate	4/212	20/8105	0.00158575	0.0134789	0.0117888	ATIC/GART/DHFR/TYMS	4
hsa04115	p53 signaling pathway	7/212	73/8105	0.00286252	0.0229002	0.0200288	CHEK1/CDK1/RRM2/CCNB1/CHEK2/CDK2/CYCS	7
hsa03050	Proteasome	5/212	46/8105	0.00669567	0.0505895	0.0442463	PSMD13/PSMD14/PSMA1/PSMD1/PSMA2	5
hsa04218	Cellular senescence	10/212	156/8105	0.00769445	0.0550761	0.0481703	CHEK1/CDK1/CDC25A/LIN9/CCNB1/CHEK2/CDK2/CCNA2/RBL1/E2F3	10

## Sheet: Table. S6
Table. S6: Prognostic analysis of 36 m6A phenotype-related genes using a univariate Cox regression model
ID	HR	HR.95L	HR.95H	pvalue
CACYBP	1.04931	1.01054	1.08957	0.0122218
DKC1	1.03643	1.00847	1.06516	0.0103217
GPR75-ASB3	6.84258	1.14829	40.7745	0.0347038
PCGF6	1.26685	1.01646	1.5789	0.0352634
SAAL1	1.17046	1.04249	1.31415	0.00771503
NPM1P9	3.103	1.02148	9.4261	0.0457751
PTGES3	1.01383	1.00538	1.02234	0.00128943
TPRKB	1.057	1.00834	1.108	0.0211548
CYCSP55	1.95063	1.0126	3.75759	0.0457818
VPS33A	1.38508	1.0327	1.85771	0.0296455
CRIPT	1.1298	1.03124	1.23778	0.00878092
HSPD1	1.0061	1.0027	1.0095	0.000425142
SMNDC1	1.19903	1.0267	1.40028	0.0218614
MALSU1	1.12065	1.01598	1.2361	0.022794
KARS	1.01866	1.00312	1.03445	0.0184474
NOP58	1.0153	1.00175	1.02904	0.0268044
PIGU	1.06363	1.00805	1.12229	0.0242794
RNU6-695P	2.05874	1.05698	4.0099	0.0337626
NFE2L3	1.0168	1.00155	1.03229	0.030733
MTFR2	1.09286	1.01297	1.17905	0.0218622
PA2G4P4	1.60459	1.03597	2.48532	0.0341525
NPM1	1.00521	1.00015	1.01029	0.0434894
TRA2A	1.0424	1.00385	1.08242	0.0307736
UTP14A	1.11616	1.02545	1.21489	0.0110516
FDXACB1	0.267041	0.0843367	0.845552	0.0247522
DPM1	1.01678	1.00259	1.03116	0.0202902
PSMA1	1.08467	1.02223	1.15094	0.00721832
SNRPB	1.00377	1.00067	1.00688	0.0169902
N6AMT1	0.570958	0.33403	0.975941	0.040462
RBM27	1.29756	1.04604	1.60956	0.0178171
CYCS	1.01057	1.00487	1.0163	0.000270445
C2orf47	1.14541	1.05552	1.24295	0.00113059
HIST1H2AH	4.23766	1.43044	12.554	0.00916009
PSMA2	1.19654	1.01877	1.40534	0.0287743
C6orf211	1.07455	1.00612	1.14763	0.0322156
